# Supplementary material for: Anti-Schistosomal activity and ADMET properties of 1,2,5-oxadiazinane-containing compound synthesized by visible-light photoredox catalysis
Source: Royal Society of Chemistry journal article supplement (doi:10.1039/d4md00599f), 2024-01-01
Supplement: d4md00599f3.pdf [file d4md00599f3.pdf]

## Electronic Supplementary Information (ESI)

### **Anti-Schistosomal Activity and ADMET Properties of 1,2,5-Oxadiazinane-Containing Compound Synthesized by Visible-Light Photoredox Catalysis**

Kennosuke Itoh,<sup>\*a,b</sup> Hiroki Nakahara,<sup>a</sup> Atsushi Takashino,<sup>a</sup> Aya Hara,<sup>a</sup> Akiho Katsuno,<sup>a</sup> Yuriko Abe,<sup>a</sup> Takaaki Mizuguchi,<sup>a,b</sup> Fumika Karaki,<sup>a,b</sup> Shigeto Hirayama,<sup>a,b</sup> Kenichiro Nagai,<sup>b</sup> Reiko Seki,<sup>b</sup> Noriko Sato,<sup>b</sup> Kazuki Okuyama,<sup>c</sup> Masashi Hashimoto,<sup>c</sup> Ken Tokunaga,<sup>d</sup> Hitoshi Ishida,<sup>e</sup> Fusako Mikami,<sup>f</sup> Kofi Dadzie Kwofie,<sup>f</sup> Hayato Kawada,<sup>f</sup> Bangzhong Lin,<sup>g</sup> Kazuto Nunomura,<sup>g</sup> Toshio Kanai,<sup>g</sup> Takeshi Hatta,<sup>f</sup> Naotoshi Tsuji,<sup>f</sup> Junichi Haruta,<sup>g</sup> and Hideaki Fujii<sup>\*a,b</sup>

- a. *Laboratory of Medicinal Chemistry, School of Pharmacy, Kitasato University, 5-9-1 Shirokane, Minato-ku, Tokyo 108-8641, Japan.*  
*Corresponding author. E-mail: itok@pharm.kitasato-u.ac.jp*
- b. *Medicinal Research Laboratories, School of Pharmacy, Kitasato University, 5-9-1 Shirokane, Minato-ku, Tokyo 108-8641, Japan.*
- c. *Department of Material Science, Graduate School of Science, Josai University, 1-1 Keyakidai, Sakado, Saitama 350-0295, Japan.*
- d. *Division of Liberal Arts, Center for Promotion of Higher Education, Kogakuin University, 2665-1 Nakano-machi, Hachioji, Tokyo 192-0015, Japan.*
- e. *Graduate School of Science and Engineering, Department of Chemistry, Materials and Bioengineering, Kansai University, 3-3-35 Yamate-cho, Suita, Osaka, 564-8680, Japan.*
- f. *Department of Parasitology and Tropical Medicine, Kitasato University School of Medicine, 1-15-1 Kitazato, Minami-ku, Sagami-hara, Kanagawa 252-0374, Japan.*
- g. *Drug Innovation Center Lead Exploration Unit, Graduate School of Pharmaceutical Sciences, Osaka University, 1-6 Yamadagaoka, Suita, Osaka 565-0871, Japan.*

---

## Table of Contents

|                                                                                                                 |            |
|-----------------------------------------------------------------------------------------------------------------|------------|
| <b>1. General information</b>                                                                                   | <b>S3</b>  |
| 1. Instruments                                                                                                  | S3         |
| 2. Materials                                                                                                    | S3         |
| 3. Reaction Monitoring and Purification                                                                         | S3         |
| <b>2. Synthesis of Ir<sup>III</sup> Complex IX</b>                                                              | <b>S4</b>  |
| <b>3. Synthesis of Nitrone 1i</b>                                                                               | <b>S4</b>  |
| <b>4. Small-Scale Photochemical Reactions</b>                                                                   | <b>S5</b>  |
| 1. Equipment for Small-Scale Photochemical Reaction                                                             | S5         |
| 2. General Procedure                                                                                            | S5         |
| <b>5. Photochemical Flow Reaction</b>                                                                           | <b>S6</b>  |
| 1. Photochemical Flow Reactor for Multi-Gram Scale Synthesis                                                    | S6         |
| 2. Procedure for Multi-Gram Scale Synthesis of 3tb                                                              | S6         |
| <b>6. Synthesis of <i>anti</i>-Schistosomal Molecule 4</b>                                                      | <b>S7</b>  |
| <b>7. Characterization of Products</b>                                                                          | <b>S8</b>  |
| 1. Characterization of Ir <sup>III</sup> Complex IX                                                             | S8         |
| 2. Characterization of Nitrones 1h and 1i                                                                       | S8         |
| 3. Characterization of Previously Reported 1,2,5-Oxadiazinanes Acquired in this Research                        | S8         |
| 4. Characterization of Novel 1,2,5-Oxadiazinanes                                                                | S10        |
| 5. Characterization of <i>Anti</i> -Schistosomal Molecule 4                                                     | S13        |
| <b>8. NMR Spectra</b>                                                                                           | <b>S14</b> |
| <b>9. Quenching Experiment</b>                                                                                  | <b>S54</b> |
| <b>10. Determination of Quantum Yield</b>                                                                       | <b>S54</b> |
| <b>11. Determination of Redox Potential and Excited-State Potential of Ir<sup>III</sup> complex VIII and IX</b> | <b>S55</b> |
| <b>12. Computation of Dipole Moment</b>                                                                         | <b>S58</b> |
| <b>13. Single Crystal X-Ray Diffraction of 3ab</b>                                                              | <b>S61</b> |
| <b>14. Biological Assay</b>                                                                                     | <b>S64</b> |
| <b>15. ADMET Assay</b>                                                                                          | <b>S64</b> |
| 1. Solubility and LogD                                                                                          | S64        |
| 2. Caco-2 Assay                                                                                                 | S64        |
| 3. LC-MS/MS Analysis                                                                                            | S64        |
| 4. Acid Stability Assay                                                                                         | S64        |
| 5. Metabolic Stability in Microsomes                                                                            | S64        |
| 6. Cytotoxicity Assay                                                                                           | S65        |
| 7. Cardiotoxicity Assay                                                                                         | S65        |
| <b>16. References</b>                                                                                           | <b>S66</b> |



---

## 1. General Information

### 1.1. Instruments

Proton NMR spectra were recorded using Agilent 400 MR (400 MHz) and Agilent 600 MR (600 MHz) spectrometers. Chemical shifts were reported in parts per million (ppm) downfield ( $\delta$ ) relative to internal tetramethylsilane (TMS,  $\delta$  = 0.00) or/with the solvent reference as the internal standard ( $\text{CDCl}_3$ ,  $\delta$  = 7.26;  $\text{CD}_3\text{OD}$ ,  $\delta$  = 3.31;  $[\text{D}_6]\text{Acetone}$ ,  $\delta$  = 2.05;  $[\text{D}_6]\text{DMSO}$ ,  $\delta$  = 2.50). Data were presented as follows: chemical shift, multiplicity (s = singlet, d = doublet, t = triplet, q = quartet, quint = quintet, sept = septet, br = broad, m = multiplet), coupling constants (Hz), integration, and assignment. Carbon NMR spectra were recorded using Agilent 400 MR (100 MHz) and Agilent 600 MR (600 MHz) spectrometers with complete proton decoupling. Chemical shifts were reported in ppm downfield ( $\delta$ ) relative to the respective solvent reference as the internal standard ( $\text{CDCl}_3$ ,  $\delta$  = 77.16;  $\text{CD}_3\text{OD}$ ,  $\delta$  = 49.00;  $[\text{D}_6]\text{Acetone}$ ,  $\delta$  = 29.84;  $[\text{D}_6]\text{DMSO}$ ,  $\delta$  = 39.52). Fluorine-19 NMR spectra were recorded using Agilent 400 MR (376 MHz) and Agilent 600 MR (600 MHz) spectrometers without complete proton decoupling. Chemical shifts were reported in ppm downfield ( $\delta$ ) relative to the respective solvent reference as the external standard ( $\text{CFCl}_3$ ,  $\delta$  = 0.00) in  $\text{CDCl}_3$ . Infrared (IR) spectra were recorded using a JASCO FT/IR-5300 IR spectrophotometer, with  $\nu_{\text{max}}$  given in  $\text{cm}^{-1}$ . Mass spectra were obtained using JEOL JMS-T100LP AccuTOF and JEOL JMS-700 MStation spectrometers. Melting points were recorded using a YANAKO MP-S3 apparatus. X-ray diffraction measurements for the 1,2,5-oxadiazinane **3ab** were performed at 93K using a Rigaku R-Axis RAPID diffractometer with graphite monochromated Cu K $\alpha$  radiation ( $\lambda$  = 1.54187 Å). Elemental analysis (C, H and N) of the *anti*-Schistosomal molecule **4** was performed using a J-SCIENCE LAB MICRO CORDER JM11. The absorption spectrum of the  $\text{Ir}^{\text{III}}$  complex **IX** was measured using a JASCO V-730 spectrophotometer. The emission spectra of the  $\text{Ir}^{\text{III}}$  complex **IX** at ambient temperature and 77K were recorded using a JASCO FP-8300 spectrophotometer. Electrochemical measurements for the  $\text{Ir}^{\text{III}}$  complexes **VIII** and **IX** were conducted using an electrochemical analyzer (Als/CHI, model 760D) equipped with a single-compartment cell under an argon atmosphere.

### 1.2. Materials

All reaction solvents were anhydrous and were purchased from FUJIFILM Wako Pure Chemical Corporation. Deuterated solvents for NMR spectroscopic measurements were obtained from KANTO CHEMICAL Co., Inc.  $\text{Ir}^{\text{III}}$  and  $\text{Ru}^{\text{II}}$  complexes **I–XI** were prepared using previously reported procedures.<sup>1,2</sup> A novel  $\text{Ir}^{\text{III}}$  complex **IX** was synthesized using  $[\text{Ir}(\text{dFCF}_3\text{ppy})_2\text{Cl}]_2$  and 2-(2,4-difluorophenyl)-4-(trifluoromethyl)pyridine<sup>3</sup> following the known method mentioned above. Nitrones **1a–1u** were prepared according to previously reported methods.<sup>4</sup> *N,N,N',N'*-Tetramethyldiaminomethane (**2a**) was purchased from Tokyo Chemical Industry Co., Ltd., while other *N,N,N',N'*-tetraalkyldiaminomethanes **2b–2e** were prepared using previously reported procedures.<sup>5</sup>

### 1.3. Reaction Monitoring and Purification

All reaction were monitored performed by thin layer chromatography (TLC), using glass TLC plate, silica gel coated with fluorescent indicator F254. The TLC was visualized by UV-quenching and oxidative staining with phosphomolybdic acid (PMA) / ethanol solution. Flash chromatography was performed using Silica Gel (PSQ-60B) purchased from Fuji Silysia Chemical, LTD. Organic solvents and volatile compounds were removed by evaporation at 40 °C.

## 2. Synthesis of Ir<sup>III</sup> Complex IX

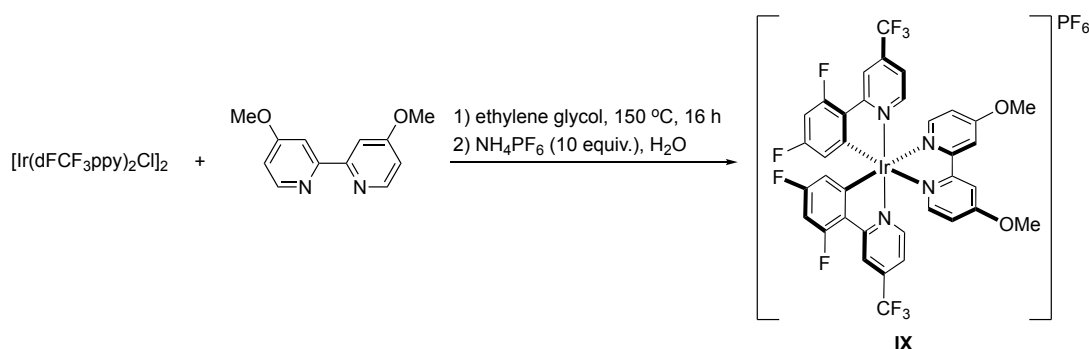

Scheme S1.

To a 30 mL eggplant flask equipped with a stir bar, [Ir(dFCF<sub>3</sub>ppy)<sub>2</sub>Cl]<sub>2</sub> (180 mg, 0.121 mmol, 1.00 equiv.), 4,4'-dimethoxy-2,2'-bipyridine (60.0 mg, 0.277 mmol, 2.29 equiv.), and ethylene glycol (8.20 mL) were added under a stream of argon. The resulting suspension was heated to 150 °C and stirred for 16 hours. The resulting yellowish solution was cooled to room temperature and poured into aqueous NH<sub>4</sub>PF<sub>6</sub> (197 mg, 1.21 mmol, 10.0 equiv.) / water (5.00 mL) solution was added. The resulting suspension was stirred for overnight, and then the bright yellow precipitates was collected by filtration followed by washing with water (20.0 mL). The yellow precipitates was purified by flash chromatography (stationary phase: silica gel, eluent: gradient from 50% AcOEt / *n*-hexane to 100% AcOEt) to afford 220 mg (85%) of IX as a bright yellow solid.

## 3. Synthesis of Nitron 1i

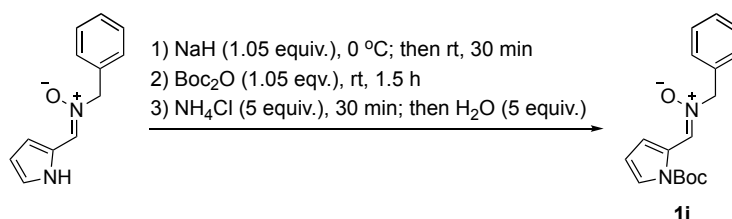

Scheme S2.

To a 50 mL single-neck round-bottom flask equipped with a stir bar, (Z)-N-benzyl-1-(1H-pyrrol-2-yl)methanimine oxide (500 mg, 2.50 mmol, 1.00 equiv.) and THF (12.5 mL) were added under a stream of argon. The resulting colorless solution was cooled to 0 °C and stirred for 10 minutes, after which NaH (60% dispersion in mineral oil) (175 mg, 2.62 mmol, 1.05 equiv.) was added. The resulting suspension, containing grayish-white precipitates, was warmed to room temperature and stirred until hydrogen gas evolution ceased. Boc<sub>2</sub>O (572 mg, 2.62 mmol, 1.05 equiv.), pre-weighed as a solid before melting, was then added to the suspension and stirred for 1.5 hours. Upon completion of the reaction, NH<sub>4</sub>Cl (668 mg, 12.5 mmol, 5.00 equiv.) was added to the reaction mixture with vigorous stirring for 30 minutes to form a suspension with white precipitates, followed by the addition of water (225 mg, 12.5 mmol, 5.00 equiv.). The resulting suspension was evaporated, yielding white precipitates as the crude product. The crude product was purified directly by flash chromatography (stationary phase: spherical silica gel; eluent: 10% → 25% → 50% ethyl acetate/*n*-hexane) to afford 677 mg (90%) of (Z)-N-benzyl-1-(1-(tert-butoxycarbonyl)-1H-pyrrol-2-yl)methanimine oxide (1i) as colorless flakes.

## 4. Small-Scale Photochemical Reactions

### 4.1. Equipment for Small-Scale Photochemical Reaction

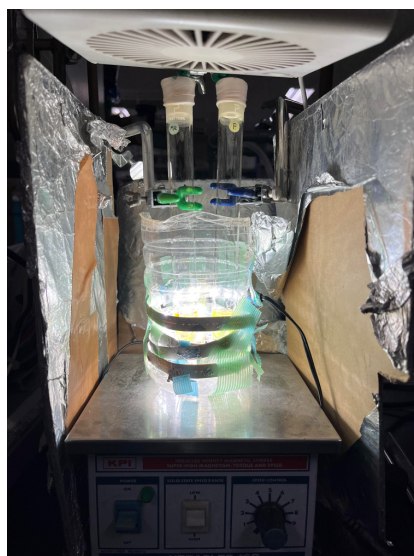

Figure S1.

Small-scale photochemical reactions (Table 1, Scheme 2) were conducted employing a 12 W white LED tape light sourced from Akiba LED PIKARI-KAN (<https://www.akiba-led.jp/product/1019>). The LED tape light, measuring 10 mm in width and 1 m in length, features SAMSUNG 5630, LM561B LED chips with a color temperature of 5000 K. A DOSHISHA FST-106U WH cooling fan was utilized, and the LED tape was affixed around a PET bottle with slits.

### 4.2. General Procedure

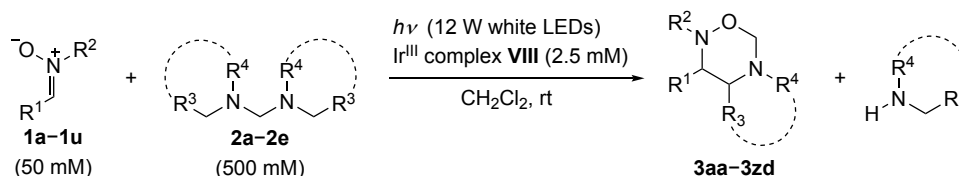

Scheme S3.

To a test tube equipped with a stir bar were added nitron **1a** (50.0 mg, 237  $\mu\text{mol}$ , 1.00 equiv.),  $\text{CH}_2\text{Cl}_2$  (4.74 mL),  $\text{Ir}^{\text{III}}$  complex **VIII** (12.7 mg, 11.8  $\mu\text{mol}$ , 0.0500 equiv.), and *N,N,N',N'*-tetramethyldiaminomethane (**2a**) (323  $\mu\text{L}$ , 2.37 mmol, 10.0 equiv.). The resulting solution was degassed by bubbling with argon for 15 min under stirring. External irradiation was performed using a homemade photochemical reactor equipped with a 12 W white LED tape light (Figure S1). The resulting bright yellow solution was stirred at room temperature for 6 h, after which the volatile compounds were removed through evaporation. The crude product was purified through flash chromatography (stationary phase: spherical silica gel; eluent: gradient ranging from 20% ethyl acetate/*n*-hexane) to afford 54.9 mg (86%) of ( $\pm$ )-2-benzyl-5-methyl-3-phenyl-1,2,5-oxadiazinane (**3aa**) as a colorless solid.

## 5. Photochemical Flow Reaction

### 5.1. Photochemical Flow Reactor for Multi-Gram Scale Synthesis

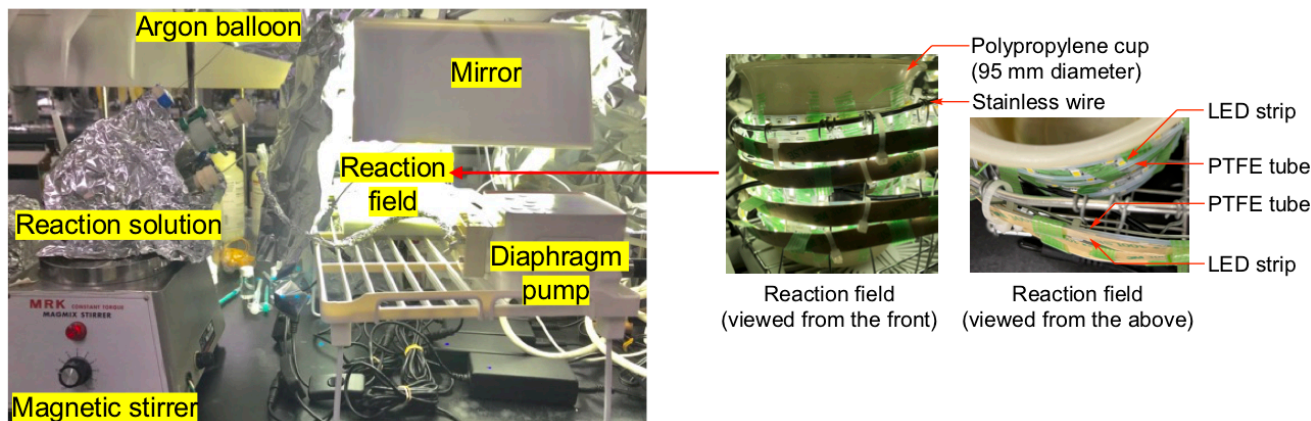

Figure S2.

For the gram-scale photoflow synthesis of **3tb** (Scheme 3), a dedicated photochemical flow system was constructed. Specifications and conditions for the photoflow synthesis are as follows: LED tapes measuring 4 meters in length (60 LEDs/m), PTFE tube with an outer diameter of 1.59 mm and inner diameter of 0.8 mm, spanning 3.75 meters, diaphragm pump model TAKUMINA Q-5-KR-UP-S.

### 5.2. Procedure for Multi-Gram Scale Synthesis of **3tb**

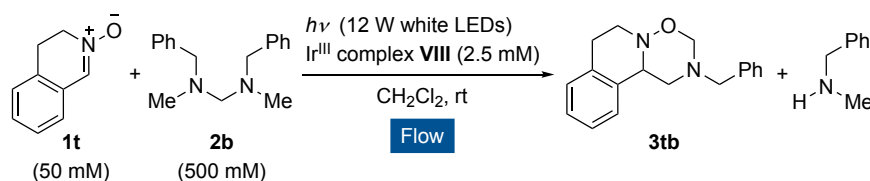

Scheme S4.

To a 500 mL three-neck round-bottom flask equipped with a stir bar were added nitron **1t** (1.70 g, 11.6 mmol, 1.00 equiv.), CH<sub>2</sub>Cl<sub>2</sub> (231 mL), Ir<sup>III</sup> complex **VIII** (618 mg, 0.578 mmol, 0.0500 equiv.), and *N,N*-dibenzyl-*N',N'*-dimethylmethanediamine (**2b**) (29.4 g, 116 mmol, 10.0 equiv.). The resulting bright yellow solution was degassed by bubbling argon through it for 15 minutes while stirring. Using a diaphragm pump, the resulting CH<sub>2</sub>Cl<sub>2</sub> solution was transferred to the reaction field for irradiation (Figure S2). The residence time was set to 45 minutes, resulting in an average flow rate of 0.0420 mL/min. During the flow reaction, the 500 mL three-neck round-bottom flask was filled with argon using an argon balloon. The CH<sub>2</sub>Cl<sub>2</sub> solution, which turned brownish, was collected into a 500 mL single-neck round-bottom flask. After completing the flow, CH<sub>2</sub>Cl<sub>2</sub> (115 mL) was added to the 500 mL three-neck round-bottom flask. The resulting CH<sub>2</sub>Cl<sub>2</sub> solution in the 500 mL three-neck round-bottom flask, containing a small amount of reagents, was then delivered to the reaction field for irradiation at the same flow rate mentioned above and collected into the same 500 mL single-neck round-bottom flask. The combined brownish solution in the 500 mL single-neck round-bottom flask was evaporated, yielding a brownish oil as the crude product. The crude product was dissolved in Et<sub>2</sub>O (115 mL), and then acetic acid (13.3 mL, 231 mmol, 20.0 equiv.) was added. After stirring for 30 minutes, a colorless solid precipitated. The resulting precipitate was removed by filtration and washed with Et<sub>2</sub>O. The filtrate was evaporated, yielding a pale brown oil, which was purified through flash chromatography (stationary phase: spherical silica gel; eluent: 9% ethyl acetate/*n*-hexane) to afford 1.88 g (58%) of (±)-2-Benzyl-1,2,3,6,7,11b-hexahydro-[1,2,5]oxadiazino[3,2-*a*]isoquinoline (**3tb**) as a colorless viscous oil. The ratio of the eluent was changed to 50% ethyl acetate/*n*-hexane, yielding some fractions containing the Ir<sup>III</sup> complex. The counter anion was possibly altered from PF<sub>6</sub> of **VIII** to another, which needs to be determined. We have been attempting to establish the regeneration method of **VIII**. Next, the colorless solid was added to a saturated aqueous solution of NaHCO<sub>3</sub>, followed by extraction with AcOEt to recover unreacted **2b**. The recovered **2b** was purified by distillation under reduced pressure, yielding 13.2 g (48%) of **2b** as a colorless oil, which was reusable.

## 6. Synthesis of *anti*-Schistosomal Molecule 4

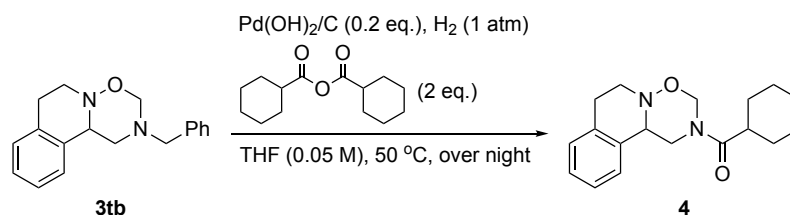

**Scheme S5.**

To a 200 mL single-neck round-bottom flask equipped with a stir bar were added (±)-2-Benzyl-1,2,3,6,7,11b-hexahydro-[1,2,5]oxadiazino[3,2-a]isoquinoline (**3tb**) (518 mg, 1.85 mmol, 1.00 equiv.), cyclohexanecarboxylic anhydride (880 mg, 3.69 mmol, 2.00 equiv.), and THF (37.0 mL). The resulting solution was conditioned under reduced pressure using a low-pressure hand pump, then filled with argon via an argon balloon. Pd(OH)<sub>2</sub>/C (20 wt%, dry basis) (259 mg, 0.369 mmol, 0.200 equiv.) was then added to the THF solution, which was again conditioned under reduced pressure using a low-pressure hand pump, followed by the introduction of H<sub>2</sub> gas to the reaction mixture using a balloon. The mixture was stirred overnight. The suspension was filtered, and the filtrate was evaporated, yielding a pale yellow oil as the crude product. The crude product was purified by flash chromatography (stationary phase: spherical silica gel; eluent: 9% ethyl acetate/*n*-hexane) to afford 333 mg (60%) of (±)-cyclohexyl(1,6,7,11b-tetrahydro-[1,2,5]oxadiazino[3,2-a]isoquinolin-2(3*H*)-yl)methanone (**4**) as a colorless solid.

## 7. Characterization of Products

### 7.1. Characterization of Ir<sup>III</sup> Complex

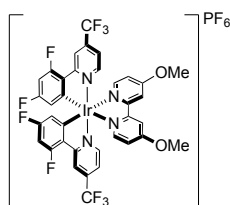

#### (4,4'-Dimethoxy-2,2'-bipyridine)bis[3,5-difluoro-2-[4-(trifluoromethyl)-2-pyridinyl-κN]phenyl-κC]iridium(III) hexafluorophosphate (IX)

Bright yellow solid; <sup>1</sup>H NMR (600 MHz, [D<sub>6</sub>]Acetone, 22 °C, TMS, ppm): δ = 8.57–8.49 (2H, m), 8.41 (2H, d, *J* = 2.7 Hz), 8.30 (2H, d, *J* = 6.3 Hz), 7.96 (2H, d, *J* = 6.5 Hz), 7.56 (2H, dd, *J* = 6.3, 2.0 Hz), 7.27 (2H, dd, *J* = 6.5, 2.7 Hz), 6.85 (2H, ddd, *J* = 12.9, 8.8, 2.4 Hz), 5.96 (2H, dd, *J* = 8.8, 2.4 Hz), 4.1 (6H, s); <sup>13</sup>C NMR (150 MHz, [D<sub>6</sub>]Acetone, 22 °C, TMS, ppm): δ = 166.5, 165.2 (dd, *J* = 261.2, 13.2 Hz), 163.0 (dd, *J* = 258.2, 12.5 Hz), 156.1 (d, *J* = 7.3 Hz), 152.9, 152.2, 140.6 (q, *J* = 34.5 Hz), 127.9 (dd, *J* = 8.9, 2.9 Hz), 123.3 (q, *J* = 273.1 Hz), 120.7 (dd, *J* = 6.0, 3.1 Hz), 119.9 (q, *J* = 21.3 Hz), 115.4, 115.1 (dd, *J* = 14.7, 2.9 Hz), 112.8, 99.9 (dd, *J* = 27.1, 27.1 Hz), 57.4; <sup>19</sup>F (564 MHz, [D<sub>6</sub>]Acetone, 23 °C, TMS, ppm): δ = –109.2 (1F, dt, *J* = 12.1, 4.2 Hz), –105.7 (1F, td, *J* = 11.2, 9.0 Hz), –65.8 (3F, s); HRMS (ESI): *m/z* Calcd for C<sub>36</sub>H<sub>22</sub>F<sub>10</sub>IrN<sub>4</sub>O<sub>2</sub> [M]<sup>+</sup>: 925.1216; Found: 925.1213.

### 7.2. Characterization of Novel Nitrones 1h and 1i

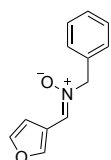

#### (Z)-N-Benzyl-1-(furan-3-yl)methanimine oxide (1h)

Pale brown solid; M.p. 98–99 °C; <sup>1</sup>H NMR (400 MHz, CDCl<sub>3</sub>, 22 °C, TMS, ppm): δ = 8.90 (1H, s), 7.54–7.36 (6H, m), 7.33 (1H, s), 5.03 (2H, s); <sup>13</sup>C NMR (100 MHz, CDCl<sub>3</sub>, 22 °C, TMS, ppm): δ = 146.3, 142.8, 133.1, 129.4, 129.2 (2C), 127.8, 116.8, 109.4, 69.4; IR (KBr): ν = 3076, 1591, 1457, 1430, 1135, 1018, 818 cm<sup>–1</sup>; HRMS (FAB): *m/z* Calcd for C<sub>12</sub>H<sub>12</sub>NO<sub>2</sub>: 202.0868 [M+H]<sup>+</sup>; Found: 202.0868.

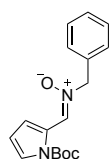

#### (Z)-N-Benzyl-1-(1-(tert-butoxycarbonyl)-1H-pyrrol-2-yl)methanimine oxide (1i)

Colorless flake; M.p. 131–132 °C; <sup>1</sup>H NMR (400 MHz, CDCl<sub>3</sub>, 22 °C, TMS, ppm): δ = 8.70 (1H, s), 8.15 (1H, dd, *J* = 3.6, 1.6 Hz), 7.53–7.43 (2H, m), 7.43–7.31 (4H, m), 6.29 (1H, dd, *J* = 3.6, 3.6 Hz), 5.03 (2H, s), 1.59 (9H, s); <sup>13</sup>C NMR (100 MHz, CDCl<sub>3</sub>, 22 °C, TMS, ppm): δ = 149.4, 133.9, 129.1, 129.0, 128.8, 126.6, 126.4, 124.6, 120.2, 112.0, 84.8, 70.6, 28.1; IR (KBr): ν = 3156, 2983, 2950, 1751, 1566, 1471, 1327, 1296, 1127, 835, 737 cm<sup>–1</sup>; HRMS (ESI): *m/z* Calcd for C<sub>17</sub>H<sub>21</sub>N<sub>2</sub>O<sub>3</sub>: 301.1552 [M+H]<sup>+</sup>; Found: 301.1547.

### 7.3. Characterization of Previously Reported 1,2,5-Oxadiazinanes Acquired in this Research

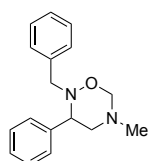

#### (±)-2-Benzyl-5-methyl-3-phenyl-1,2,5-oxadiazinane (3aa)

<sup>1</sup>H NMR (400 MHz, CDCl<sub>3</sub>, 22 °C, TMS, ppm): δ = 7.60–7.07 (m, 10H), 4.65 (d, *J* = 9.7 Hz, 1H), 4.40 (dd, *J* = 9.7, 1.8 Hz, 1H), 4.03 (dd, *J* = 10.6, 2.3 Hz, 1H), 3.88 (d, *J* = 14.6 Hz, 1H), 3.55 (d, *J* = 14.6 Hz, 1H), 3.05 (dd, *J* = 13.0, 10.6 Hz, 1H), 2.87 (ddd, *J* = 13.0, 2.3, 1.8 Hz, 1H), 2.52 (s, 3H); <sup>13</sup>C NMR (100 MHz, CDCl<sub>3</sub>, 22 °C, TMS, ppm): δ = 139.8, 138.3, 128.9, 128.5, 128.1, 128.0, 127.9, 126.9, 87.0, 65.0, 60.0, 59.6, 39.7; HRMS (ESI): *m/z* Calcd for C<sub>17</sub>H<sub>21</sub>N<sub>2</sub>O: 269.1654 [M+H]<sup>+</sup>; found: 269.1652. The spectral characteristics were consistent with spectral data previously reported.<sup>5b</sup>

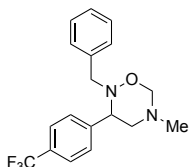

#### (±)-2-Benzyl-5-methyl-3-(4-(trifluoromethyl)phenyl)-1,2,5-oxadiazinane (3ba)

<sup>1</sup>H NMR (400 MHz, CDCl<sub>3</sub>, 22 °C, TMS, ppm): δ = 7.61 (d, *J* = 8.2 Hz, 2H), 7.52 (br d, *J* = 7.0 Hz, 1H), 7.36–7.15 (m, 5H), 4.67 (d, *J* = 10.0 Hz, 1H), 4.41 (dd, *J* = 10.0, 2.0 Hz, 1H), 4.10 (dd, *J* = 10.6, 3.0 Hz, 1H), 3.82 (d, *J* = 14.7 Hz, 1H), 3.58 (d, *J* = 14.7 Hz, 1H), 3.03 (dd, *J* = 13.2, 10.6 Hz, 1H), 2.86 (ddd, *J* = 13.2, 3.0, 2.0 Hz, 1H), 2.53 (s, 3H); <sup>13</sup>C NMR (100 MHz, CDCl<sub>3</sub>, 22 °C, TMS, ppm): δ = 143.9, 137.8, 130.3 (q, *J* = 32.5 Hz), 128.5, 128.2 (2C), 127.1, 125.9 (q, *J* = 3.7 Hz), 124.1 (q, *J* = 272.2 Hz), 86.9, 64.4, 59.85, 59.81, 39.6; <sup>19</sup>F NMR (376 MHz, CDCl<sub>3</sub>, 23 °C, TMS, ppm): δ = –62.6; HRMS (ESI): *m/z* Calcd for C<sub>18</sub>H<sub>20</sub>F<sub>3</sub>N<sub>2</sub>O: 337.1528 [M+H]<sup>+</sup>; found: 337.1520. The spectral characteristics were consistent with spectral data previously reported.<sup>5b</sup>

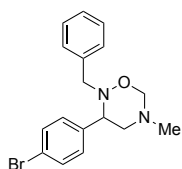

**(±)-2-Benzyl-3-(4-bromophenyl)-5-methyl-1,2,5-oxadiazinane (3ca)**

$^1\text{H}$  NMR (400 MHz,  $\text{CDCl}_3$ , 22 °C, TMS, ppm):  $\delta$  = 7.53–7.41 (m, 2H), 7.39–7.14 (m, 7H), 4.63 (d,  $J$  = 10.0 Hz, 1H), 4.40 (dd,  $J$  = 10.0, 1.9 Hz, 1H), 4.00 (dd,  $J$  = 10.5, 3.0 Hz, 1H), 3.82 (d,  $J$  = 14.6 Hz, 1H), 3.55 (d,  $J$  = 14.6 Hz, 1H), 2.98 (dd,  $J$  = 13.1, 10.5 Hz, 1H), 2.85 (ddd,  $J$  = 13.1, 3.0, 1.9 Hz, 1H), 2.51 (s, 3H);  $^{13}\text{C}$  NMR (100 MHz,  $\text{CDCl}_3$ , 22 °C, TMS, ppm):  $\delta$  = 138.8, 138.0, 132.1, 129.5, 128.6, 128.2, 127.1, 121.9, 87.0, 64.2, 59.9, 59.6, 39.7; HRMS (ESI):  $m/z$  Calcd for  $\text{C}_{17}\text{H}_{20}^{81}\text{BrN}_2\text{O}$ : 349.0739  $[M+H]^+$ ; found: 349.0751. The spectral characteristics were consistent with spectral data previously reported.<sup>5b</sup>

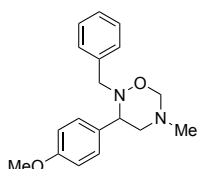

**(±)-2-Benzyl-3-(4-methoxyphenyl)-5-methyl-1,2,5-oxadiazinane (3da)**

$^1\text{H}$  NMR (400 MHz,  $\text{CDCl}_3$ , 22 °C, TMS, ppm):  $\delta$  = 7.43–7.13 (m, 7H), 6.97–6.78 (m, 2H), 4.62 (d,  $J$  = 9.8 Hz, 1H), 4.39 (dd,  $J$  = 9.8, 1.9 Hz, 1H), 3.98 (dd,  $J$  = 10.7, 3.0 Hz, 1H), 3.89 (d,  $J$  = 14.8 Hz, 1H), 3.79 (s, 3H), 3.53 (d,  $J$  = 14.8 Hz, 1H), 3.00 (dd,  $J$  = 12.7, 10.7 Hz, 1H), 2.85 (ddd,  $J$  = 12.7, 3.0, 1.9 Hz, 1H), 2.51 (s, 3H);  $^{13}\text{C}$  NMR (100 MHz,  $\text{CDCl}_3$ , 22 °C, TMS, ppm):  $\delta$  = 159.4, 138.4, 131.7, 129.0, 128.5, 128.2, 126.9, 114.3, 87.0, 64.3, 60.0, 59.4, 55.4, 39.7; HRMS (ESI):  $m/z$  Calcd for  $\text{C}_{18}\text{H}_{23}\text{N}_2\text{O}_2$ : 299.1760  $[M+H]^+$ ; found: 299.1758. The spectral characteristics were consistent with spectral data previously reported.<sup>5b</sup>

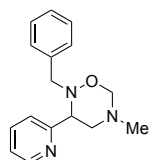

**(±)-2-Benzyl-5-methyl-3-(pyridin-2-yl)-1,2,5-oxadiazinane (3ea)**

$^1\text{H}$  NMR (400 MHz,  $\text{CDCl}_3$ , 22 °C, TMS, ppm):  $\delta$  = 8.63–8.52 (m, 1H), 7.67 (ddd,  $J$  = 7.7, 7.7, 1.8 Hz, 1H), 7.47 (d,  $J$  = 7.7 Hz, 1H), 7.35–7.16 (m, 6H), 4.78 (d,  $J$  = 10.2 Hz, 1H), 4.41 (dd,  $J$  = 10.2, 2.0 Hz, 1H), 4.30 (dd,  $J$  = 10.7, 2.9 Hz, 1H), 3.81 (d,  $J$  = 14.9 Hz, 1H), 3.69 (d,  $J$  = 14.9 Hz, 1H), 3.18 (dd,  $J$  = 13.2, 10.7 Hz, 1H), 2.99 (ddd,  $J$  = 13.2, 2.9, 2.0 Hz, 1H), 2.58 (s, 3H);  $^{13}\text{C}$  NMR (100 MHz,  $\text{CDCl}_3$ , 22 °C, TMS, ppm):  $\delta$  = 159.4, 149.6, 137.9, 137.0, 128.5, 128.2, 127.0, 122.9, 122.4, 86.8, 66.0, 60.1, 58.3, 39.6; HRMS (ESI):  $m/z$  Calcd for  $\text{C}_{16}\text{H}_{20}\text{N}_3\text{O}$ : 270.1606  $[M+H]^+$ ; found: 270.1609. The spectral characteristics were consistent with spectral data previously reported.<sup>5b</sup>

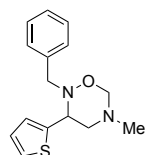

**(±)-2-Benzyl-5-methyl-3-(thiophen-2-yl)-1,2,5-oxadiazinane (3fa)**

$^1\text{H}$  NMR (400 MHz,  $\text{CDCl}_3$ , 22 °C, TMS, ppm):  $\delta$  = 7.41–7.18 (m, 6H), 7.03 (br d,  $J$  = 3.6 Hz, 1H), 6.96 (dd,  $J$  = 5.1, 3.6 Hz, 1H), 4.63 (d,  $J$  = 10.0 Hz, 1H), 4.37 (d,  $J$  = 10.4 Hz, 1H), 4.36 (d,  $J$  = 10.0 Hz, 1H), 3.96 (d,  $J$  = 14.7 Hz, 1H), 3.56 (d,  $J$  = 14.7 Hz, 1H), 3.11 (dd,  $J$  = 12.9, 10.4 Hz, 1H), 2.97 (br d,  $J$  = 12.9 Hz, 1H), 2.51 (s, 3H);  $^{13}\text{C}$  NMR (100 MHz,  $\text{CDCl}_3$ , 22 °C, TMS, ppm):  $\delta$  = 141.9, 138.1, 128.7, 128.2, 127.0, 126.6, 125.7, 125.6, 87.0, 60.7, 60.1, 59.6, 39.6; HRMS (ESI):  $m/z$  Calcd for  $\text{C}_{15}\text{H}_{19}\text{N}_2\text{OS}$ : 275.1218  $[M+H]^+$ ; found: 275.1228. The spectral characteristics were consistent with spectral data previously reported.<sup>5b</sup>

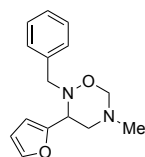

**(±)-2-Benzyl-3-(furan-2-yl)-5-methyl-1,2,5-oxadiazinane (3ga)**

$^1\text{H}$  NMR (400 MHz,  $[\text{D}_6]\text{Acetone}$ , 22 °C, TMS, ppm):  $\delta$  = 7.57–7.53 (dd,  $J$  = 1.6, 0.8 Hz, 1H), 7.33–7.12 (m, 5H), 6.52–6.38 (m, 2H), 4.54 (d,  $J$  = 9.6 Hz, 1H), 4.27 (d,  $J$  = 9.6 Hz, 1H), 4.18 (dd,  $J$  = 11.1, 2.5 Hz, 1H), 3.78 (d,  $J$  = 14.7 Hz, 1H), 3.62 (d,  $J$  = 14.7 Hz, 1H), 3.24 (dd,  $J$  = 13.5, 11.1 Hz, 1H), 2.88 (ddd,  $J$  = 13.5, 2.5, 2.0 Hz, 1H), 2.47s (s, 3H);  $^{13}\text{C}$  NMR (100 MHz,  $[\text{D}_6]\text{Acetone}$ , 22 °C, TMS, ppm):  $\delta$  = 153.4, 143.2, 139.3, 129.3, 128.7, 127.4, 111.3, 109.2, 87.4, 60.4, 58.3, 57.0, 39.5; HRMS (ESI):  $m/z$  Calcd for  $\text{C}_{15}\text{H}_{19}\text{N}_2\text{O}_2$ : 259.1447  $[M+H]^+$ ; Found: 259.1458. The spectral characteristics were consistent with spectral data previously reported.<sup>5b</sup>

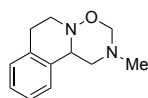

**(±)-2-Methyl-1,2,3,6,7,11b-hexahydro-[1,2,5]oxadiazino[3,2-a]isoquinoline (3ta)**

$^1\text{H}$  NMR (400 MHz,  $\text{CDCl}_3$ , 22 °C, TMS, ppm):  $\delta$  = 7.21–7.14 (2H, m), 7.13–7.02 (2H, m), 4.62 (1H, d,  $J$  = 9.4 Hz), 4.47 (1H, dd,  $J$  = 9.4, 1.6 Hz), 4.05 (1H, d,  $J$  = 9.6 Hz), 3.50 (1H, dd,  $J$  = 10.6, 6.5 Hz), 3.42 (1H, d,  $J$  = 10.6 Hz), 3.28 (1H, ddd,  $J$  = 12.0, 10.4, 4.5 Hz), 3.02 (1H, ddd,  $J$  = 12.0, 10.4, 4.5 Hz), 2.90–2.70 (2H, m), 2.56 (3H, s);  $^{13}\text{C}$  NMR (100 MHz,  $\text{CDCl}_3$ , 22 °C, TMS, ppm):  $\delta$  = 134.5, 134.1, 128.9, 127.1, 126.3, 123.8, 87.0, 60.8, 55.9, 52.8, 40.2, 29.1; HRMS (ESI):  $m/z$  Calcd for  $\text{C}_{12}\text{H}_{17}\text{N}_2\text{O}$ : 205.1341  $[M+H]^+$ ; Found: 205.1307. The spectral characteristics were consistent with spectral data previously reported.<sup>5b</sup>

## 7.4. Characterization of Novel 1,2,5-Oxadiazinanes

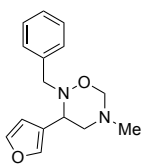

### (±)-2-Benzyl-3-(furan-3-yl)-5-methyl-1,2,5-oxadiazinane (3ha)

Pale yellow oil;  $^1\text{H}$  NMR (400 MHz,  $\text{CD}_3\text{OD}$ , 22  $^\circ\text{C}$ , TMS, ppm):  $\delta$  = 7.57 (1H, s), 7.49 (1H, dd,  $J$  = 1.1, 1.1 Hz), 7.29–7.14 (5H, m), 6.51 (1H, d,  $J$  = 1.1 Hz), 4.41 (1H, d,  $J$  = 9.8 Hz), 4.39–4.28 (1H, m), 4.06 (1H, dd,  $J$  = 10.2, 3.2 Hz), 3.94 (1H, d,  $J$  = 14.4 Hz), 3.53 (1H, d,  $J$  = 14.4 Hz), 2.91 (1H, dd,  $J$  = 12.7, 10.2 Hz), 2.85 (1H, ddd,  $J$  = 12.7, 3.2, 1.7 Hz), 2.41 (3H, s);  $^{13}\text{C}$  NMR (100 MHz,  $\text{CD}_3\text{OD}$ , 22  $^\circ\text{C}$ , TMS, ppm):  $\delta$  = 144.7, 141.9, 138.9, 129.7, 128.7, 127.6, 124.2, 109.9, 87.3, 60.1, 59.5, 57.5, 39.1; IR (neat):  $\nu$  = 2939, 1497, 1454, 1159, 1021  $\text{cm}^{-1}$ ; HRMS (ESI):  $m/z$  Calcd for  $\text{C}_{15}\text{H}_{19}\text{N}_2\text{O}$ : 259.1447  $[M+\text{H}]^+$ ; Found: 259.1456. To prevent the observation of broadened signals in the NMR measurement, we utilized  $\text{CD}_3\text{OD}$  as a deuterated solvent.

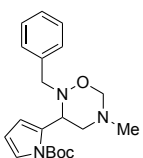

### (±)-tert-Butyl 2-(2-benzyl-5-methyl-1,2,5-oxadiazinan-3-yl)-1H-pyrrole-1-carboxylate (3ia)

Pale yellow solid; M.p. 74–75  $^\circ\text{C}$ ;  $^1\text{H}$  NMR (400 MHz,  $[\text{D}_6]\text{Acetone}$ , 22  $^\circ\text{C}$ , TMS, ppm):  $\delta$  = 7.35–7.14 (6H, m), 6.54–6.30 (1H, br s), 6.18 (1H, dd,  $J$  = 1.1, 1.1 Hz), 5.01 (1H, dd,  $J$  = 9.9, 3.1 Hz), 4.56 (1H, d,  $J$  = 9.8 Hz), 4.29 (1H, d,  $J$  = 9.8 Hz), 3.93 (1H, d,  $J$  = 14.7 Hz), 3.63 (1H, d,  $J$  = 14.7 Hz), 3.03 (1H, br d,  $J$  = 12.6 Hz), 2.91 (1H, dd,  $J$  = 12.6, 9.9 Hz), 2.48 (3H, s), 1.63 (9H, s);  $^{13}\text{C}$  NMR (100 MHz,  $[\text{D}_6]\text{Acetone}$ , 22  $^\circ\text{C}$ , TMS, ppm):  $\delta$  = 150.1, 139.6, 134.2, 129.3, 128.7, 127.4, 122.3, 113.3, 111.3, 87.4, 84.9, 59.9, 59.6, 56.8, 39.6, 28.1; IR (KBr):  $\nu$  = 3169, 2971, 2932, 1735, 1321, 969, 732  $\text{cm}^{-1}$ ; HRMS (ESI):  $m/z$   $\text{C}_{20}\text{H}_{28}\text{N}_3\text{O}_3$ : 358.2131  $[M+\text{H}]^+$ ; Found: 358.2114. To prevent the observation of broadened signals in the NMR measurement, we utilized  $[\text{D}_6]\text{Acetone}$  as a deuterated solvent.

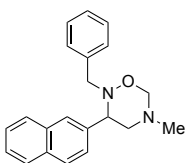

### (±)-2-Benzyl-5-methyl-3-(naphthalen-2-yl)-1,2,5-oxadiazinane (3ja)

Colorless oil;  $^1\text{H}$  NMR (400 MHz,  $\text{CDCl}_3$ , 22  $^\circ\text{C}$ , TMS, ppm):  $\delta$  = 7.93–7.74 (4H, m), 7.65–7.52 (br s, 1H), 7.50–7.40 (2H, m), 7.32–7.16 (5H, m), 4.71 (1H, d,  $J$  = 9.9 Hz), 4.44 (1H, dd,  $J$  = 9.9, 2.2 Hz), 4.21 (1H, dd,  $J$  = 10.7, 2.7 Hz), 3.92 (1H, d,  $J$  = 14.8 Hz), 3.62 (1H, d,  $J$  = 14.8 Hz), 3.16 (1H, dd,  $J$  = 12.2, 10.7 Hz), 2.93 (1H, ddd,  $J$  = 12.2, 2.7, 2.2 Hz), 2.56 (3H, s);  $^{13}\text{C}$  NMR (100 MHz,  $\text{CDCl}_3$ , 22  $^\circ\text{C}$ , TMS, ppm):  $\delta$  = 138.2, 137.3, 133.5, 133.3, 128.7, 128.6, 128.2, 127.9, 127.8, 127.1, 127.0, 126.4, 126.2, 125.5, 87.1, 65.0, 59.9, 59.8, 39.7; IR (neat):  $\nu$  = 2940, 1509, 1048, 700  $\text{cm}^{-1}$ ; HRMS (ESI):  $m/z$  Calcd for  $\text{C}_{21}\text{H}_{23}\text{N}_2\text{O}$   $[M+\text{H}]^+$ : 319.1810; Found: 319.1825.

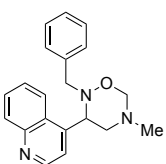

### (±)-2-Benzyl-5-methyl-3-(quinolin-4-yl)-1,2,5-oxadiazinane (3ka)

Colorless oil;  $^1\text{H}$  NMR (400 MHz,  $[\text{D}_6]\text{DMSO}$ , 80  $^\circ\text{C}$ , ppm):  $\delta$  = 8.86 (1H, d,  $J$  = 4.5 Hz), 8.46 (1H, br s), 8.05 (1H, d,  $J$  = 8.5, 1.0 Hz), 7.76 (1H, ddd,  $J$  = 8.5, 6.6, 1.2 Hz), 7.65 (1H, ddd,  $J$  = 8.5, 6.6, 1.0 Hz), 7.64 (1H, d,  $J$  = 4.5 Hz), 7.26–7.17 (5H, m), 4.88 (1H, br d,  $J$  = 10.7 Hz), 4.68 (1H, d,  $J$  = 10.0 Hz), 4.43 (1H, dd,  $J$  = 10.0, 2.2 Hz), 3.74 (1H,  $J$  = 14.9 Hz), 3.64 (1H,  $J$  = 14.9 Hz), 3.13 (1H, br dd,  $J$  = 13.1, 10.7 Hz), 2.93 (1H, ddd,  $J$  = 13.1, 3.6, 2.2 Hz), 2.54 (3H, s);  $^{13}\text{C}$  NMR (100 MHz,  $[\text{D}_6]\text{DMSO}$ , 80  $^\circ\text{C}$ , ppm):  $\delta$  = 149.8, 147.9, 144.5, 137.3, 129.6, 128.8, 127.9, 127.4, 126.24, 126.20, 125.4, 123.1, 119.6, 85.9, 58.9 (2C), 57.7, 38.5; IR (neat):  $\nu$  = 3029, 2938, 2884, 1586, 1508, 1050, 966, 759  $\text{cm}^{-1}$ ; HRMS (ESI):  $m/z$  Calcd for  $\text{C}_{20}\text{H}_{22}\text{N}_3\text{O}$   $[M+\text{H}]^+$ : 320.1763; Found: 320.1768. The  $^1\text{H}$  NMR spectrum and  $^{13}\text{C}$  NMR spectrum were measured at room temperature, where signals from conformational isomers were observed. Therefore, the measurement was conducted at 80  $^\circ\text{C}$  to coalesce the signals of the conformational isomers.

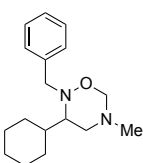

### (±)-2-Benzyl-3-cyclohexyl-5-methyl-1,2,5-oxadiazinane (3la)

Pale yellow solid; M.p. 57–58  $^\circ\text{C}$ ;  $^1\text{H}$  NMR (400 MHz,  $\text{CDCl}_3$ , 22  $^\circ\text{C}$ , TMS, ppm):  $\delta$  = 7.44–7.352 (2H, m), 7.350–7.27 (2H, m), 7.27–7.21 (1H, m), 4.33–4.18 (3H, m), 3.62 (1H, d,  $J$  = 14.8 Hz), 2.94 (1H, ddd,  $J$  = 10.1, 3.6, 3.6 Hz), 2.78 (1H, ddd,  $J$  = 12.2, 3.6, 1.2 Hz), 2.76 (1H, dd,  $J$  = 12.2, 10.1 Hz), 2.36 (3H, s), 1.89–1.593 (5H, m), 1.592–1.44 (1H, m), 1.37–0.96 (5H, m);  $^{13}\text{C}$  NMR (100 MHz,  $\text{CDCl}_3$ , 22  $^\circ\text{C}$ , TMS, ppm):  $\delta$  = 138.6, 128.5, 128.2, 126.9, 86.7, 63.5, 58.3, 52.5, 39.8, 39.1, 30.1, 27.2, 26.9, 26.8, 26.4; IR (KBr):  $\nu$  = 2953, 2925, 2849, 1452, 1047, 969  $\text{cm}^{-1}$ ; HRMS (ESI):  $m/z$  Calcd for  $\text{C}_{17}\text{H}_{27}\text{N}_2\text{O}$   $[M+\text{H}]^+$ : 275.2123; Found: 275.2122.



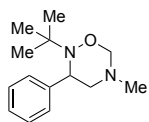

**(±)-2-(*tert*-Butyl)-5-methyl-3-phenyl-1,2,5-oxadiazinane (3ma)**

Pale yellow solid; M.p. 39–40 °C; <sup>1</sup>H NMR (400 MHz, CDCl<sub>3</sub>, 22 °C, TMS, ppm): δ = 7.36 (2H, d, *J* = 6.7 Hz), 7.31–7.19 (3H, m), 4.54 (1H, d, *J* = 9.4 Hz), 4.44 (1H, dd, *J* = 9.4, 2.5 Hz), 4.24 (1H, dd, *J* = 10.0, 2.5 Hz), 2.95 (1H, dd, *J* = 12.6, 10.0 Hz), 2.72 (1H, ddd, *J* = 12.6, 2.5, 2.5 Hz), 2.42 (3H, s), 0.91 (9H, s), <sup>13</sup>C NMR (100 MHz, CDCl<sub>3</sub>, 22 °C, TMS, ppm): δ = 141.6, 128.7, 128.3, 127.7, 87.0, 61.2, 61.0, 60.3, 39.5, 27.3; IR (KBr): ν = 2971, 2920, 2886, 1359, 1048, 978 cm<sup>-1</sup>; HRMS (ESI): *m/z* Calcd for C<sub>14</sub>H<sub>23</sub>N<sub>2</sub>O [*M*+H]<sup>+</sup>: 235.1810; Found: 235.1799.

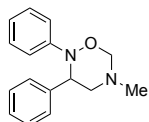

**(±)-5-Methyl-2,3-diphenyl-1,2,5-oxadiazinane (3na)**

Colorless solid; M.p. 41–42 °C; <sup>1</sup>H NMR (400 MHz, CDCl<sub>3</sub>, 22 °C, TMS, ppm): δ = 7.35–6.95 (10H, m), 4.93 (1H, d, *J* = 9.8 Hz), 4.60 (1H, dd, *J* = 9.8, 1.9 Hz), 4.51 (1H, dd, *J* = 9.5, 3.0 Hz), 3.23 (1H, dd, *J* = 13.0, 9.5 Hz), 3.00 (1H, ddd, *J* = 13.0, 3.0, 1.9 Hz), 2.60 (3H, s); <sup>13</sup>C NMR (100 MHz, CDCl<sub>3</sub>, 22 °C, TMS, ppm): δ = 149.1, 138.8, 128.4, 128.3 (2C), 127.7, 125.7, 123.2, 87.6, 64.3, 59.5, 39.6; IR (KBr): ν = 2940, 2800, 1490, 696 cm<sup>-1</sup>; HRMS (ESI): *m/z* Calcd for C<sub>16</sub>H<sub>19</sub>N<sub>2</sub>O [*M*+H]<sup>+</sup>: 255.1502; Found: 255.1497.

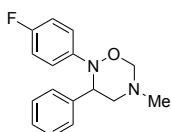

**(±)-2-(4-Fluorophenyl)-5-methyl-3-phenyl-1,2,5-oxadiazinane (3oa)**

Pale yellow solid; M.p. 41–42 °C; <sup>1</sup>H NMR (400 MHz, CDCl<sub>3</sub>, 22 °C, TMS, ppm): δ = 7.06–7.28 (7H, m), 6.76–6.86 (2H, m), 4.91 (1H, d, *J* = 9.8 Hz), 4.59 (1H, dd, *J* = 9.8, 2.0 Hz), 4.43 (1H, dd, *J* = 10.3, 3.0 Hz), 3.23 (1H, dd, *J* = 13.4, 10.3 Hz), 2.99 (1H, ddd, *J* = 13.4, 3.0, 2.0 Hz), 2.62 (3H, s); <sup>13</sup>C NMR (100 MHz, CDCl<sub>3</sub>, 22 °C, TMS, ppm): δ = 160.8 (d, *J* = 245 Hz), 145.2 (d, *J* = 2.9 Hz), 138.5, 128.5 (d, *J* = 10.5 Hz), 128.0, 125.7, 125.6, 115.1 (d, *J* = 22.4 Hz), 87.7, 65.2, 59.6, 39.7; <sup>19</sup>F (376 MHz, CDCl<sub>3</sub>, 23 °C, TMS, ppm): δ = -116.2 (3F, s); IR (KBr): ν = 2942, 1505, 1208, 700 cm<sup>-1</sup>; HRMS (ESI): *m/z* Calcd for C<sub>16</sub>H<sub>18</sub>FN<sub>2</sub>O [*M*+H]<sup>+</sup>: 273.1393; Found: 273.1403.

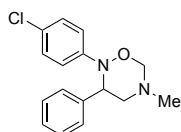

**(±)-2-(4-Chlorophenyl)-5-methyl-3-phenyl-1,2,5-oxadiazinane (3pa)**

Pale yellow solid; M.p. 57–58 °C; <sup>1</sup>H NMR (400 MHz, CDCl<sub>3</sub>, 22 °C, TMS, ppm): δ = 7.25–7.16 (5H, m), 7.13–7.05 (2H, m), 7.05–6.98 (2H, m), 7.00–6.90 (2H, m), 4.91 (1H, d, *J* = 9.9 Hz), 4.60 (1H, dd, *J* = 9.9, 1.9 Hz), 4.44 (1H, dd, *J* = 9.9, 3.0 Hz), 3.23 (1H, dd, *J* = 13.1, 9.9 Hz), 2.99 (1H, ddd, *J* = 13.1, 3.0, 1.9 Hz), 2.60 (3H, s); <sup>13</sup>C NMR (100 MHz, CDCl<sub>3</sub>, 22 °C, TMS, ppm): δ = 146.5, 139.0, 135.7, 128.9, 128.3, 128.2, 127.6, 123.6, 87.5, 64.2, 59.8, 39.6, 20.9; IR (KBr): ν = 2941, 1488, 1087, 700 cm<sup>-1</sup>; HRMS (ESI): *m/z* Calcd for C<sub>16</sub>H<sub>18</sub>ClN<sub>2</sub>O [*M*+H]<sup>+</sup>: 289.1107; Found: 289.1107.

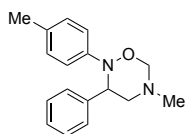

**(±)-5-Methyl-3-phenyl-2-(*p*-tolyl)-1,2,5-oxadiazinane (3qa)**

White solid; M.p. 40–41 °C; <sup>1</sup>H NMR (400 MHz, CDCl<sub>3</sub>, 22 °C, TMS, ppm): δ = 7.27–7.13 (5H, m), 7.06–7.00 (2H, m), 7.00–6.90 (2H, m), 4.91 (1H, d, *J* = 9.9 Hz), 4.58 (1H, dd, *J* = 9.9, 1.9 Hz), 4.50 (1H, dd, *J* = 10.1, 3.0 Hz), 3.20 (1H, dd, *J* = 13.0, 10.1 Hz), 3.00 (1H, ddd, *J* = 13.0, 3.0, 1.9 Hz), 2.60 (3H, s), 2.20 (3H, s); <sup>13</sup>C NMR (100 MHz, CDCl<sub>3</sub>, 22 °C, TMS, ppm): δ = 146.5, 139.0, 135.7, 128.9, 128.3, 128.2, 127.6, 123.6, 87.5, 64.2, 59.8, 39.6, 20.9; IR (KBr): ν = 2940, 1454, 969, 743 cm<sup>-1</sup>; HRMS (ESI): *m/z* Calcd for C<sub>17</sub>H<sub>22</sub>N<sub>2</sub>O [*M*+H]<sup>+</sup>: 269.1654; Found: 269.1654.

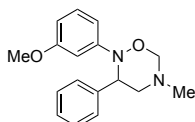

**(±)-2-(3-Methoxyphenyl)-5-methyl-3-phenyl-1,2,5-oxadiazinane (3ra)**

Pale yellow oil; <sup>1</sup>H NMR (400 MHz, CDCl<sub>3</sub>, 22 °C, TMS, ppm): δ = 7.29–7.15 (5H, m), 7.03 (1H, dd, *J* = 8.0, 8.0 Hz), 6.70 (1H, ddd, *J* = 8.1, 1.5, 1.5 Hz), 6.64 (1H, dd, *J* = 1.5, 1.5 Hz), 6.56 (1H, dd, *J* = 8.1, 1.5 Hz), 4.91 (1H, d, *J* = 9.8 Hz), 4.60 (1H, dd, *J* = 9.8, 1.2 Hz), 4.49 (1H, dd, *J* = 9.8, 2.5 Hz), 3.62 (3H, s), 3.23 (1H, dd, *J* = 12.9, 9.8 Hz), 3.00 (1H, ddd, *J* = 12.9, 2.5, 1.2 Hz), 2.58 (3H, s); <sup>13</sup>C NMR (100 MHz, CDCl<sub>3</sub>, 22 °C, TMS, ppm): δ = 159.6, 150.5, 139.0, 129.0, 128.5, 128.4, 127.8, 115.0, 111.6, 108.4, 87.6, 64.5, 59.4, 55.2, 39.7; IR (neat): ν = 2940, 2801, 1602, 1489, 1452, 1046, 698 cm<sup>-1</sup>; HRMS (ESI): *m/z* Calcd for C<sub>17</sub>H<sub>21</sub>N<sub>2</sub>O<sub>2</sub> [*M*+H]<sup>+</sup>: 285.1603; Found: 285.1616.

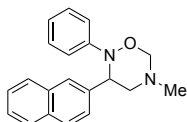

**(±)-5-Methyl-3-(naphthalen-2-yl)-2-phenyl-1,2,5-oxadiazinane (3sa)**

Colorless solid; M.p. 72–73 °C; <sup>1</sup>H NMR (400 MHz, CDCl<sub>3</sub>, 22 °C, TMS, ppm): δ = 7.79–7.64 (4H, m), 7.49–7.35 (3H, m), 7.21–7.04 (4H, m), 7.02–6.92 (1H, m), 4.95 (1H, d, *J* = 9.9 Hz), 4.70 (1H, dd, *J* = 9.9, 3.0 Hz), 4.63 (1H, dd, *J* = 9.9, 1.9 Hz), 3.32 (1H, dd, *J* = 13.1, 9.9 Hz), 3.05 (1H, ddd, *J* = 13.1, 3.0, 1.9 Hz), 2.63 (3H, s); <sup>13</sup>C NMR (100 MHz, CDCl<sub>3</sub>, 22 °C, TMS, ppm): δ = 149.2, 136.7, 133.3, 133.0, 128.5, 128.2, 128.0, 127.7, 127.4, 126.1 (2C), 126.0, 125.9, 123.3, 87.7, 64.3, 59.7, 39.8; IR (KBr): ν = 2933, 1491, 1056, 693 cm<sup>-1</sup>; HRMS (ESI): *m/z* Calcd for C<sub>20</sub>H<sub>21</sub>N<sub>2</sub>O [*M*+H]<sup>+</sup>: 305.1654; Found: 305.1654.

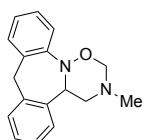

**(±)-3-Methyl-3,4,4a,9-tetrahydro-2H-dibenzo[c,f][1,2,5]oxadiazino[2,3-a]azepine (3ua)**

Colorless solid; 131–132 °C; <sup>1</sup>H NMR (400 MHz, CDCl<sub>3</sub>, 22 °C, TMS, ppm): δ = 7.48–7.41 (1H, m), 7.29–7.04 (5H, m), 6.98–6.89 (2H, m), 4.84 (1H, d, *J* = 9.6 Hz), 4.69 (1H, d, *J* = 13.7 Hz), 4.65 (1H, dd, *J* = 9.6, 1.9 Hz), 4.62 (1H, dd, *J* = 10.5, 2.5 Hz), 3.35 (1H, d, *J* = 13.7 Hz), 3.21 (1H, dd, *J* = 13.0, 10.5 Hz), 3.02 (1H, ddd, *J* = 13.0, 2.5, 1.9 Hz), 2.66 (3H, s); <sup>13</sup>C NMR (100 MHz, CDCl<sub>3</sub>, 22 °C, TMS, ppm): δ = 147.9, 138.3, 136.4, 134.8, 129.0, 128.6, 127.4, 127.1, 126.6, 126.5, 123.7, 116.9, 87.7, 64.7, 61.2, 39.9, 38.9; IR (KBr): ν = 2491, 1485, 1053, 752 cm<sup>-1</sup>; HRMS (ESI): *m/z* Calcd for C<sub>17</sub>H<sub>19</sub>N<sub>2</sub>O [*M*+H]<sup>+</sup>: 267.1497; Found: 267.1485.

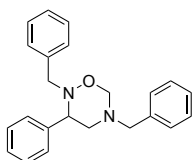

**(±)-2,5-Dibenzyl-3-phenyl-1,2,5-oxadiazinane (3ab)**

Colorless plate; M.p. 110–111 °C; <sup>1</sup>H NMR (400 MHz, CDCl<sub>3</sub>, 22 °C, TMS, ppm): δ = 7.49–7.16 (15H, m), 4.77 (1H, d, *J* = 10.2 Hz), 4.49 (1H, dd, *J* = 10.2, 2.5 Hz), 4.07 (1H, dd, *J* = 10.6, 2.5 Hz), 3.94 (2H, s), 3.89 (1H, d, *J* = 14.8 Hz), 3.59 (1H, d, *J* = 14.8 Hz), 3.09 (1H, dd, *J* = 13.4, 10.6 Hz), 2.93 (1H, ddd, *J* = 13.4, 2.5, 2.5 Hz); <sup>13</sup>C NMR (100 MHz, CDCl<sub>3</sub>, 22 °C, TMS, ppm): δ = 139.8, 138.4 (2C), 129.1, 128.9, 128.6, 128.5, 128.2, 128.0, 127.9, 127.3, 126.9, 85.4, 65.1, 59.7, 57.5, 55.9; IR (KBr): ν = 3031, 2909, 2845, 1493, 1454, 1357, 965, 736, 697 cm<sup>-1</sup>; HRMS (ESI): *m/z* Calcd for C<sub>23</sub>H<sub>25</sub>N<sub>2</sub>O [*M*+H]<sup>+</sup>: 345.1967; Found: 345.1974. The single crystal of this compound was obtained by recrystallization from *n*-hexane / ethyl acetate, and its structure was analyzed by single-crystal X-ray crystallography.

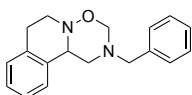

**(±)-2-Benzyl-1,2,3,6,7,11b-hexahydro-[1,2,5]oxadiazino[3,2-a]isoquinoline (3tb)**

Colorless oil; <sup>1</sup>H NMR (400 MHz, CDCl<sub>3</sub>, 22 °C, TMS, ppm): δ = 7.69–7.27 (5H, m), 7.22–7.04 (3H, m), 7.02–6.87 (1H, m), 4.80 (1H, d, *J* = 10.0 Hz), 4.53 (1H, dd, *J* = 10.0, 1.6 Hz), 4.12 (1H, br d, *J* = 10.2 Hz), 3.98 (1H, br d, *J* = 13.3 Hz), 3.96 (1H, br d, *J* = 13.3 Hz), 3.61–3.38 (2H, m), 3.29 (1H, ddd, *J* = 14.5, 11.7, 5.7 Hz), 3.05 (1H, ddd, *J* = 14.5, 9.8, 4.3 Hz), 2.99–2.75 (2H, m); <sup>13</sup>C NMR (100 MHz, CDCl<sub>3</sub>, 22 °C, TMS, ppm): δ = 138.4, 134.5, 134.2, 129.2, 128.9, 128.6, 127.5, 127.1, 126.2, 123.9, 85.5, 60.6, 56.5, 53.3, 52.9, 29.1; IR (neat): ν = 2922, 2830, 1493, 1358, 1022, 743 cm<sup>-1</sup>; HRMS (ESI): *m/z* Calcd for C<sub>18</sub>H<sub>21</sub>N<sub>2</sub>O [*M*+H]<sup>+</sup>: 281.1654; Found: 281.1647.

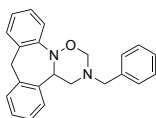

**(±)-3-Benzyl-3,4,4a,9-tetrahydro-2H-dibenzo[c,f][1,2,5]oxadiazino[2,3-a]azepine (3ub)**

Colorless amorphous; <sup>1</sup>H NMR (400 MHz, CDCl<sub>3</sub>, 22 °C, TMS, ppm): δ = 7.54–7.17 (7H, m), 7.16–7.00 (4H, m), 6.94 (1H, ddd, *J* = 7.4, 7.4, 1.2 Hz), 6.85–6.75 (1H, m), 4.98 (1H, d, *J* = 10.5 Hz), 4.73 (1H, dd, *J* = 10.5, 2.0 Hz), 4.70 (1H, d, *J* = 13.8 Hz), 4.66 (1H, dd, *J* = 10.6, 2.3 Hz), 4.13 (1H, d, *J* = 13.3 Hz), 4.07 (1H, d, *J* = 13.3 Hz), 3.34 (1H, d, *J* = 13.8 Hz), 3.27 (1H, dd, *J* = 13.4, 10.6 Hz), 3.05 (1H, ddd, *J* = 13.4, 2.3, 2.0 Hz); <sup>13</sup>C NMR (100 MHz, CDCl<sub>3</sub>, 22 °C, TMS, ppm): δ = 147.9, 138.2, 138.0, 136.3, 134.7, 129.0, 128.8, 128.5, 128.3, 127.3, 127.2, 126.9, 126.4 (2C), 123.5, 116.7, 86.0, 64.4, 58.5, 56.0, 38.7; IR (neat): ν = 3024, 2851, 1486, 753 cm<sup>-1</sup>; HRMS (ESI): *m/z* Calcd for C<sub>23</sub>H<sub>23</sub>N<sub>2</sub>O [*M*+H]<sup>+</sup>: 343.1810; Found: 343.1817.

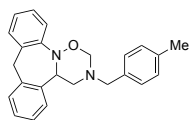

**(±)-3-(4-Methylbenzyl)-3,4,4a,9-tetrahydro-2H-dibenzo[c,f][1,2,5]oxadiazino[2,3-a]azepine (3uc)**

Pale yellow oil;  $^1\text{H}$  NMR (400 MHz,  $\text{CDCl}_3$ , 22 °C, TMS, ppm):  $\delta$  = 7.46 (1H, dd,  $J$  = 8.0, 0.9 Hz), 7.31 (2H, d,  $J$  = 7.9 Hz), 7.22 (1H, ddd,  $J$  = 7.7, 7.7, 1.4 Hz), 7.18 (2H, d,  $J$  = 7.9 Hz), 7.15–7.00 (4H, m), 6.94 (1H, ddd,  $J$  = 7.4, 7.4, 1.2 Hz), 6.85–6.76 (1H, m), 4.97 (1H, d,  $J$  = 10.0 Hz), 4.73 (1H, dd,  $J$  = 10.0, 2.0 Hz), 4.70 (1H, d,  $J$  = 13.7 Hz), 4.66 (1H, dd,  $J$  = 10.5, 2.4 Hz), 4.09 (1H, d,  $J$  = 13.2 Hz), 4.04 (1H, d,  $J$  = 13.2 Hz), 3.34 (1H, d,  $J$  = 13.7 Hz), 3.25 (1H, dd,  $J$  = 13.3, 10.5 Hz), 3.05 (1H, ddd,  $J$  = 13.3, 2.4, 2.0 Hz), 2.36 (3H, s);  $^{13}\text{C}$  NMR (100 MHz,  $\text{CDCl}_3$ , 22 °C, TMS, ppm):  $\delta$  = 147.9, 138.0, 137.0, 136.3, 135.0, 134.7, 129.2, 129.0, 128.7, 128.3, 127.2, 126.8, 126.4 (2C), 123.4, 116.7, 85.9, 64.4, 58.4, 55.7, 38.7, 21.1; IR (neat):  $\nu$  = 2921, 1485, 1032, 753  $\text{cm}^{-1}$ ; HRMS (ESI):  $m/z$  Calcd for  $\text{C}_{24}\text{H}_{25}\text{N}_2\text{O}$   $[M+\text{H}]^+$ : 357.1967; Found: 357.1979.

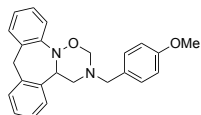

**(±)-3-(4-Methoxybenzyl)-3,4,4a,9-tetrahydro-2H-dibenzo[c,f][1,2,5]oxadiazino[2,3-a]azepine (3ud)**

Colorless solid; M.p. 72–73 °C;  $^1\text{H}$  NMR (400 MHz,  $\text{CDCl}_3$ , 22 °C, TMS, ppm):  $\delta$  = 7.46 (1H, dd,  $J$  = 8.0, 1.0 Hz), 7.38–7.30 (1H, m), 7.23 (1H, ddd,  $J$  = 7.8, 7.8, 1.3 Hz), 7.13–6.99 (4H, m), 6.98–6.87 (3H, m), 6.86–6.77 (1H, m), 4.96 (1H, d,  $J$  = 10.2 Hz), 4.72 (1H, dd,  $J$  = 10.2, 2.1 Hz), 4.70 (1H, d,  $J$  = 13.2 Hz), 4.65 (1H, dd,  $J$  = 10.5, 2.4 Hz), 4.06 (1H, d,  $J$  = 13.0 Hz), 4.02 (1H, d,  $J$  = 13.0 Hz), 3.84 (3H, s), 3.34 (1H, d,  $J$  = 13.2 Hz), 3.25 (1H, dd,  $J$  = 13.3, 10.5 Hz), 3.04 (1H, ddd,  $J$  = 13.3, 2.4, 2.1 Hz);  $^{13}\text{C}$  NMR (100 MHz,  $\text{CDCl}_3$ , 22 °C, TMS, ppm):  $\delta$  = 159.0, 148.0, 138.1, 136.4, 134.7, 130.3, 130.2, 128.8, 128.4, 128.3, 127.3, 126.9, 126.5, 126.4, 123.5, 116.7, 113.9, 85.8, 64.5, 55.4, 55.3, 38.8; IR (KBr):  $\nu$  = 2950, 2835, 1513, 1247, 764  $\text{cm}^{-1}$ ; HRMS (ESI):  $m/z$  Calcd for  $\text{C}_{24}\text{H}_{25}\text{N}_2\text{O}_2$   $[M+\text{H}]^+$ : 373.1916; Found: 373.1914.

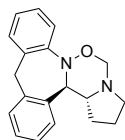

**(±)-1,2,3,3a,3b,8-Hexahydro-15H-dibenzo[c,f]pyrrolo[2',1':4,5][1,2,5]oxadiazino[2,3-a]azepine (3ue)**

Pale yellow solid; M.p. 131–132 °C;  $^1\text{H}$  NMR (400 MHz,  $\text{CDCl}_3$ , 22 °C, TMS, ppm):  $\delta$  = 7.34 (1H, d,  $J$  = 7.8 Hz), 7.20–6.92 (6H, m), 6.88 (1H, td,  $J$  = 7.4, 1.2 Hz), 5.20 (1H, d,  $J$  = 10.0 Hz), 4.86 (1H, d,  $J$  = 10.0 Hz), 4.80–4.30 (2H, br m), 3.72–3.18 (3H, br m), 3.01 (1H, td,  $J$  = 8.8, 4.4 Hz), 2.24–1.70 (4H, br m);  $^{13}\text{C}$  NMR (100 MHz,  $\text{CDCl}_3$ , 22 °C, TMS, ppm):  $\delta$  = 146.5, 139.8, 135.3, 133.9, 130.4, 128.3, 127.4, 127.0, 126.0, 125.8, 122.9, 116.3, 84.0, 69.6, 65.1, 47.3, 39.0, 26.9, 21.9; IR (neat):  $\nu$  = 2961, 2902, 2861, 1600, 1483, 1242, 938, 764  $\text{cm}^{-1}$ ; HRMS (ESI):  $m/z$  Calcd for  $\text{C}_{19}\text{H}_{21}\text{N}_2\text{O}$ : 193.1654  $[M+\text{H}]^+$ ; Found: 293.1664. The relative stereochemistry was determined to be in the trans configuration by ROESY spectroscopy.

## 7.5. Characterization of Anti-Schistosomal Molecule 4

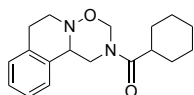

**(±)-Cyclohexyl(1,6,7,11b-tetrahydro-[1,2,5]oxadiazino[3,2-a]isoquinolin-2(3H)-yl)methanone (4)**

Colorless solid; M.p. 106–107 °C;  $^1\text{H}$  NMR (400 MHz,  $[\text{D}_6]\text{DMSO}$ , 100 °C, TMS, ppm):  $\delta$  = 7.30–7.08 (m, 4H), 5.60 (1H, br d,  $J$  = 10.0 Hz), 4.85 (1H, br d,  $J$  = 10.0 Hz), 4.73 (1H, br dd,  $J$  = 12.0, 2.0 Hz), 3.71 (1H, br dd,  $J$  = 10.0, 2.0 Hz), 3.45 (1H, ddd,  $J$  = 10.0, 6.5, 1.5 Hz), 3.22–3.02 (2H, m), 2.91 (1H, ddd,  $J$  = 12.0, 10.0, 4.5 Hz), 2.83 (1H, ddd,  $J$  = 16.0, 4.5, 1.5 Hz), 2.78–2.58 (1H, br m), 1.82–1.56 (5H, m), 1.50–1.29 (4H, m), 1.28–1.12 (1H, m);  $^{13}\text{C}$  NMR (100 MHz,  $[\text{D}_6]\text{DMSO}$ , 100 °C, TMS, ppm):  $\delta$  = 173.6, 133.3, 132.6, 127.9, 126.4, 125.5, 123.7, 76.2, 63.1, 51.4, 44.6, 38.7, 28.6, 28.5, 27.4, 25.0, 24.4; IR (KBr):  $\nu$  = 2929, 2851, 1642, 1443, 1037, 743  $\text{cm}^{-1}$ ; Elemental analysis calcd for  $\text{C}_{18}\text{H}_{24}\text{N}_2\text{O}_2$ : C 71.97, H 8.05, N 9.33, found: C 72.05, H 7.96, N 9.21. The  $^1\text{H}$ ,  $^{13}\text{C}$ ,  $^1\text{H}$ – $^1\text{H}$  COSY, and HSQC NMR spectrum were measured at room temperature, where signals from conformational isomers were observed. Therefore, the measurements were conducted at 100 °C to coalesce the signals of the conformational isomers.

## 8. NMR Spectra

$^1\text{H}$  NMR spectrum of (Z)-N-benzyl-1-(furan-3-yl)methanimine oxide (**1h**)

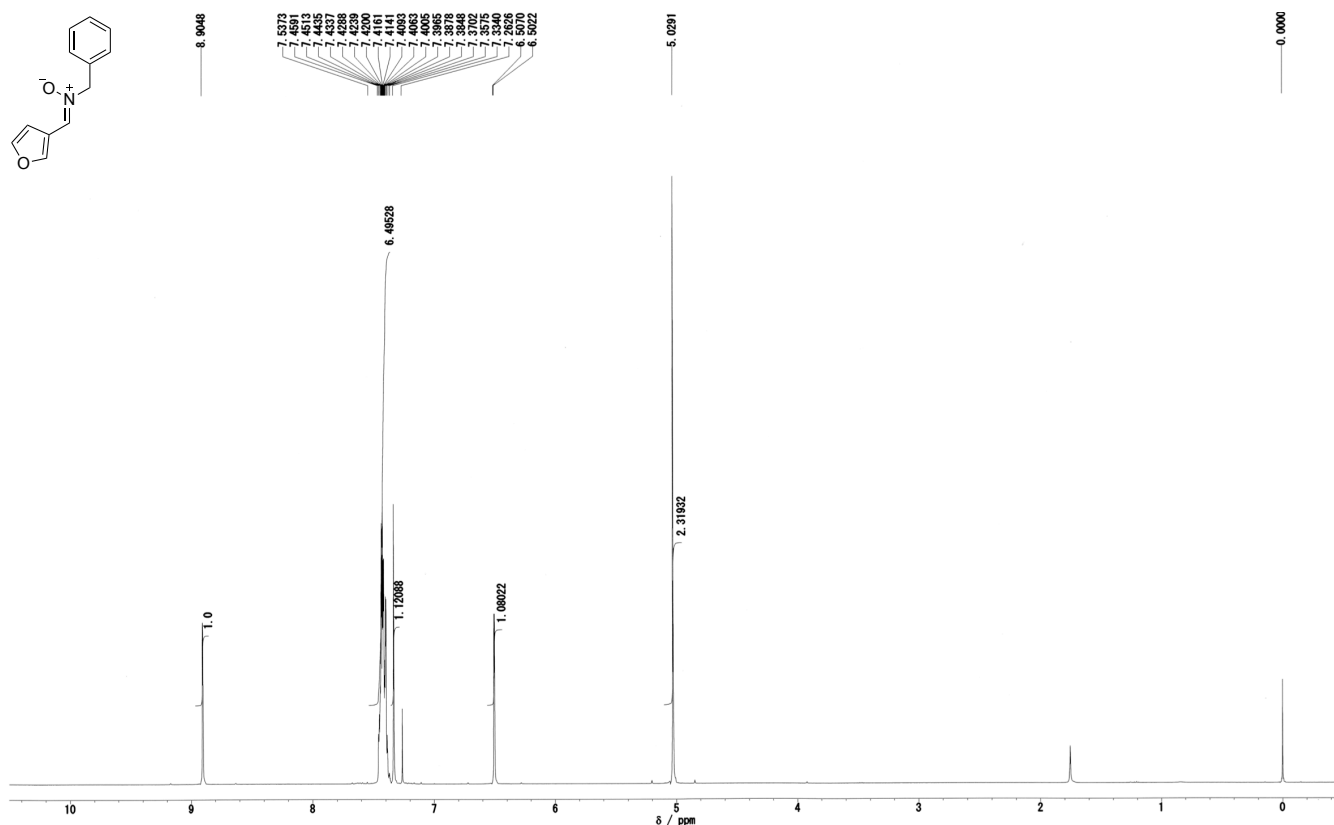

$^{13}\text{C}$  NMR spectrum of (Z)-N-benzyl-1-(furan-3-yl)methanimine oxide (**1h**)

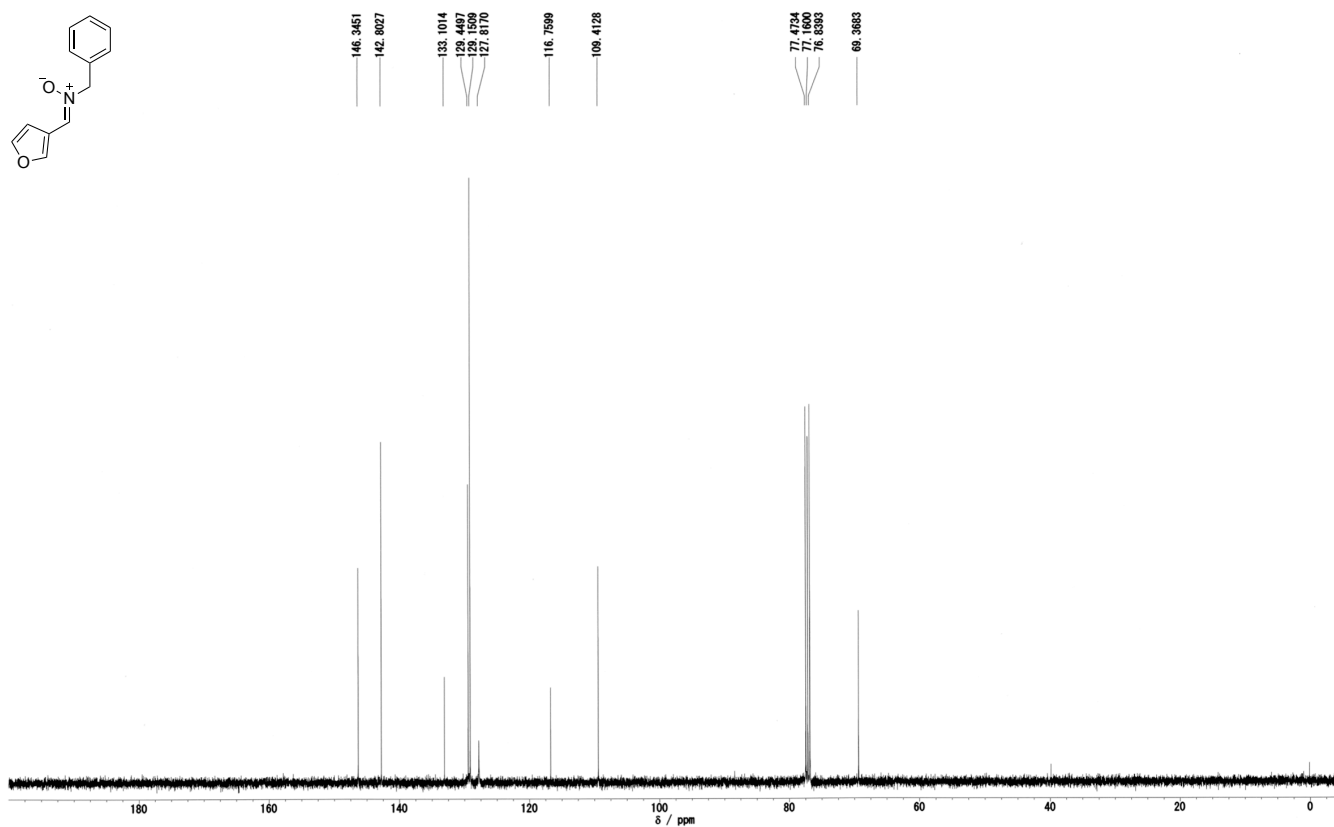

<sup>1</sup>H NMR spectrum of (Z)-N-benzyl-1-(1-(*tert*-butoxycarbonyl)-1*H*-pyrrol-2-yl)methanimine oxide (**3i**)

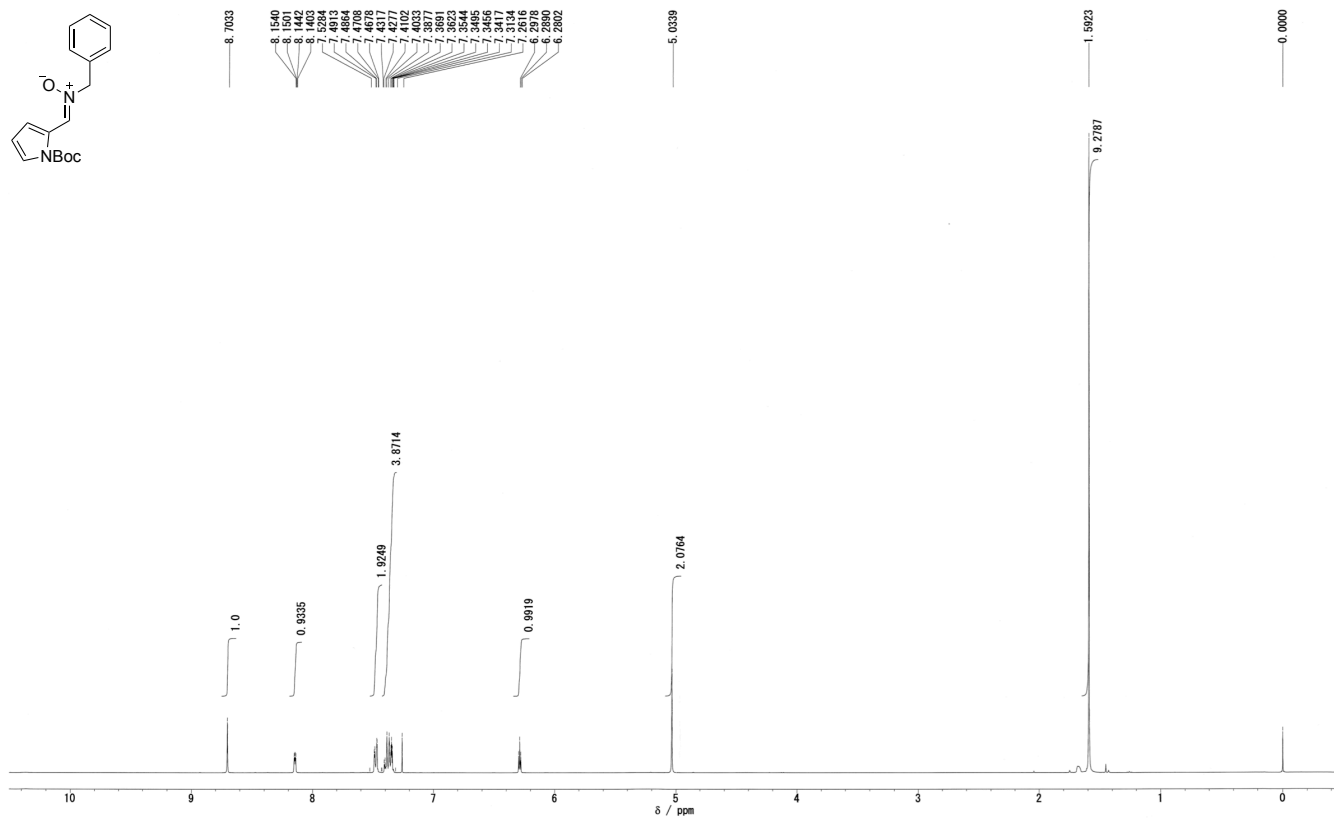

<sup>13</sup>C NMR spectrum of (Z)-N-benzyl-1-(1-(*tert*-butoxycarbonyl)-1*H*-pyrrol-2-yl)methanimine oxide (**3i**)

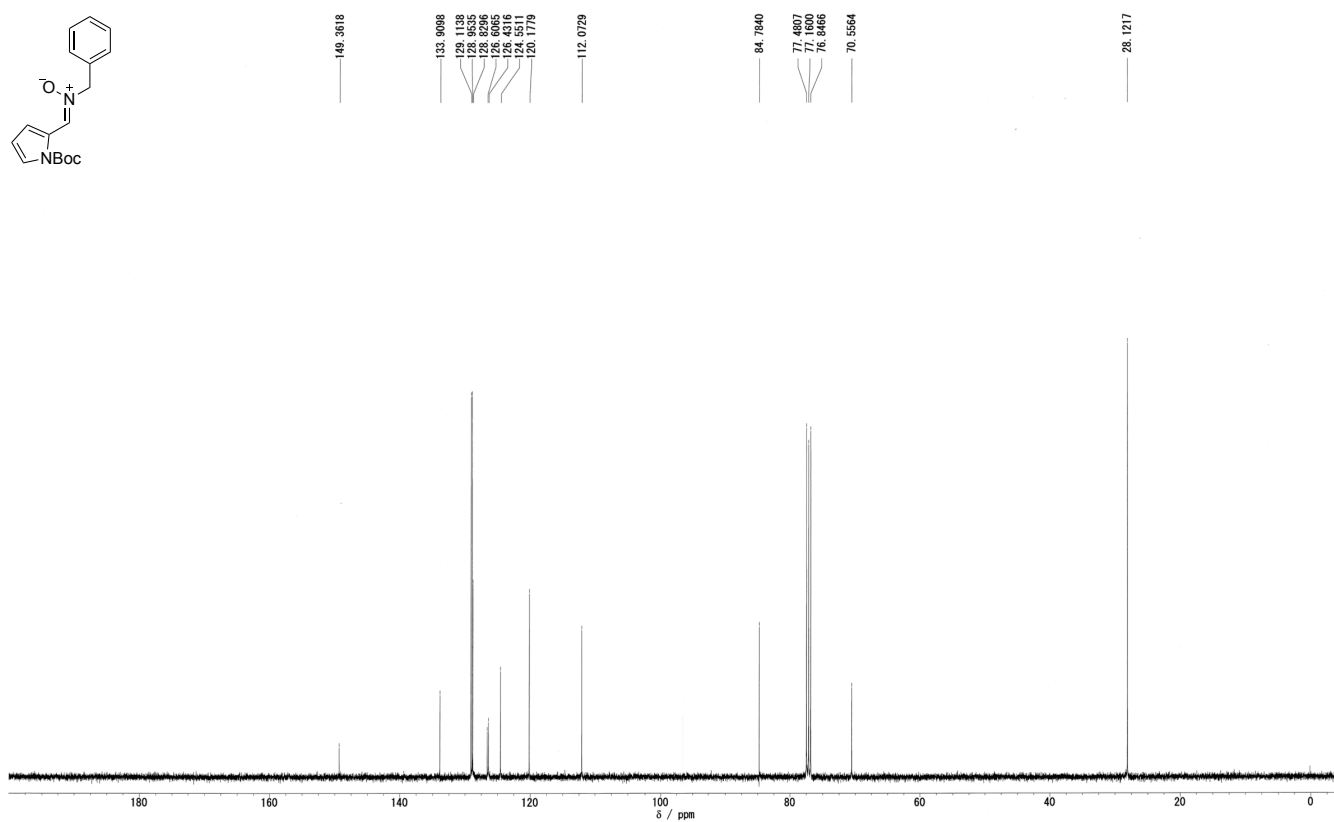

$^1\text{H}$  NMR spectrum of (4,4'-Dimethoxy-2,2'-bipyridine)bis[3,5-difluoro-2-[4-trifluoromethyl-2-pyridinyl- $\kappa N$ ]phenyl- $\kappa C$ ]iridium(III) hexafluorophosphate (IX)

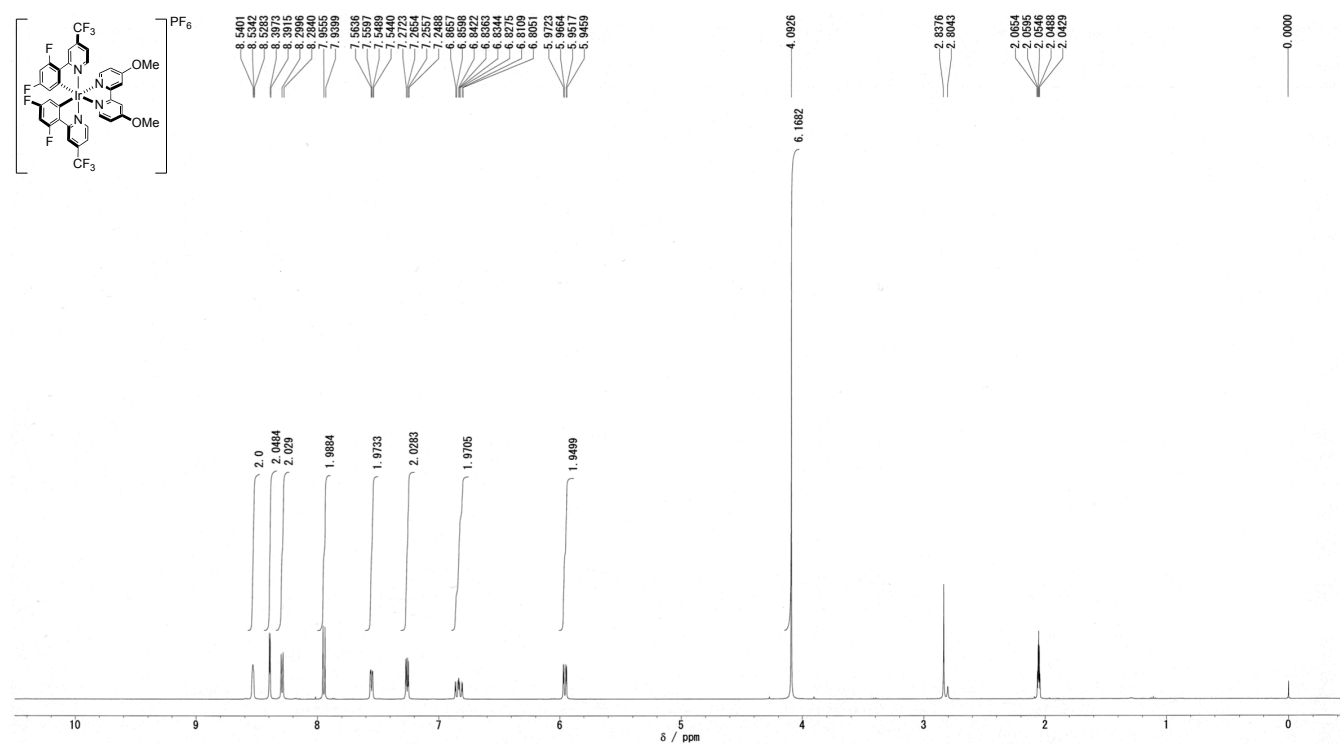

$^{13}\text{C}$  NMR spectrum of (4,4'-Dimethoxy-2,2'-bipyridine)bis[3,5-difluoro-2-[4-trifluoromethyl-2-pyridinyl- $\kappa N$ ]phenyl- $\kappa C$ ]iridium(III) hexafluorophosphate (IX)

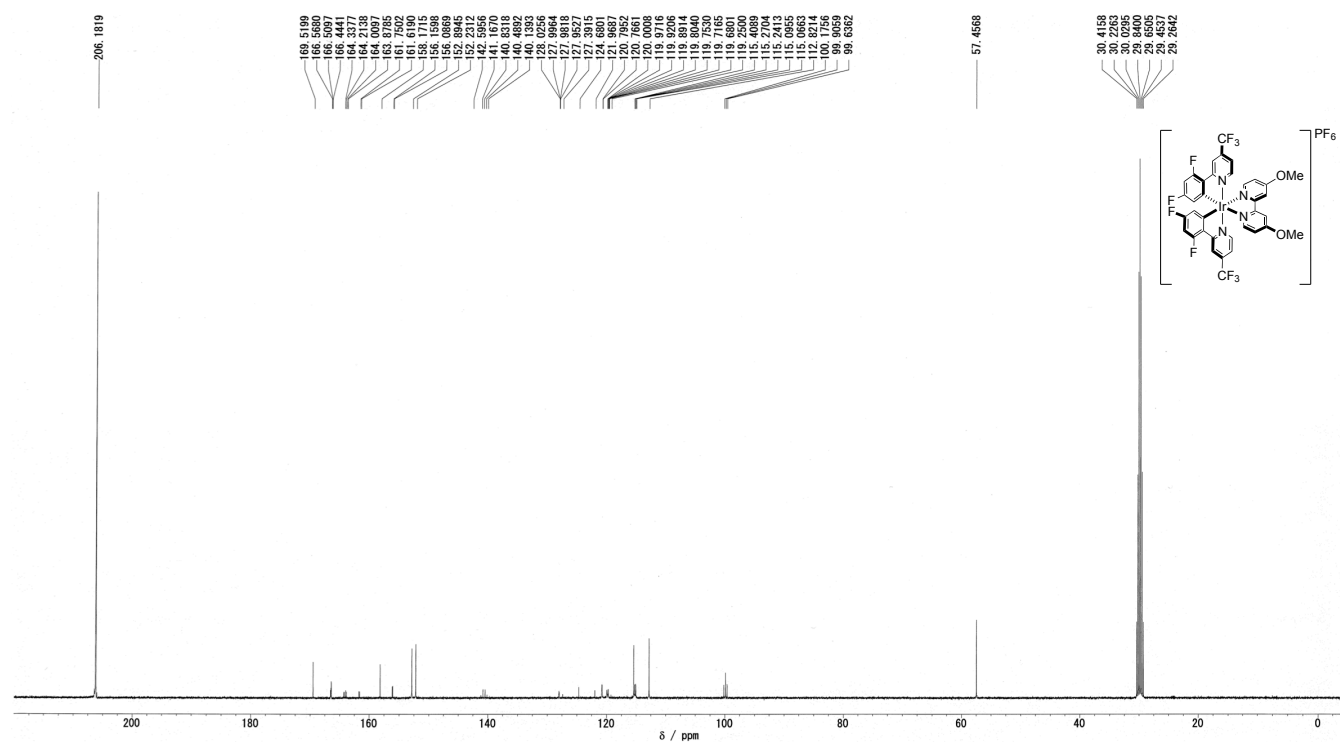

$^{13}\text{C}$  NMR spectrum of (4,4'-Dimethoxy-2,2'-bipyridine)bis[3,5-difluoro-2-[4-trifluoromethyl-2-pyridinyl- $\kappa N$ ]phenyl- $\kappa C$ ]iridium(III) hexafluorophosphate (**IX**) (amplified y-axis)

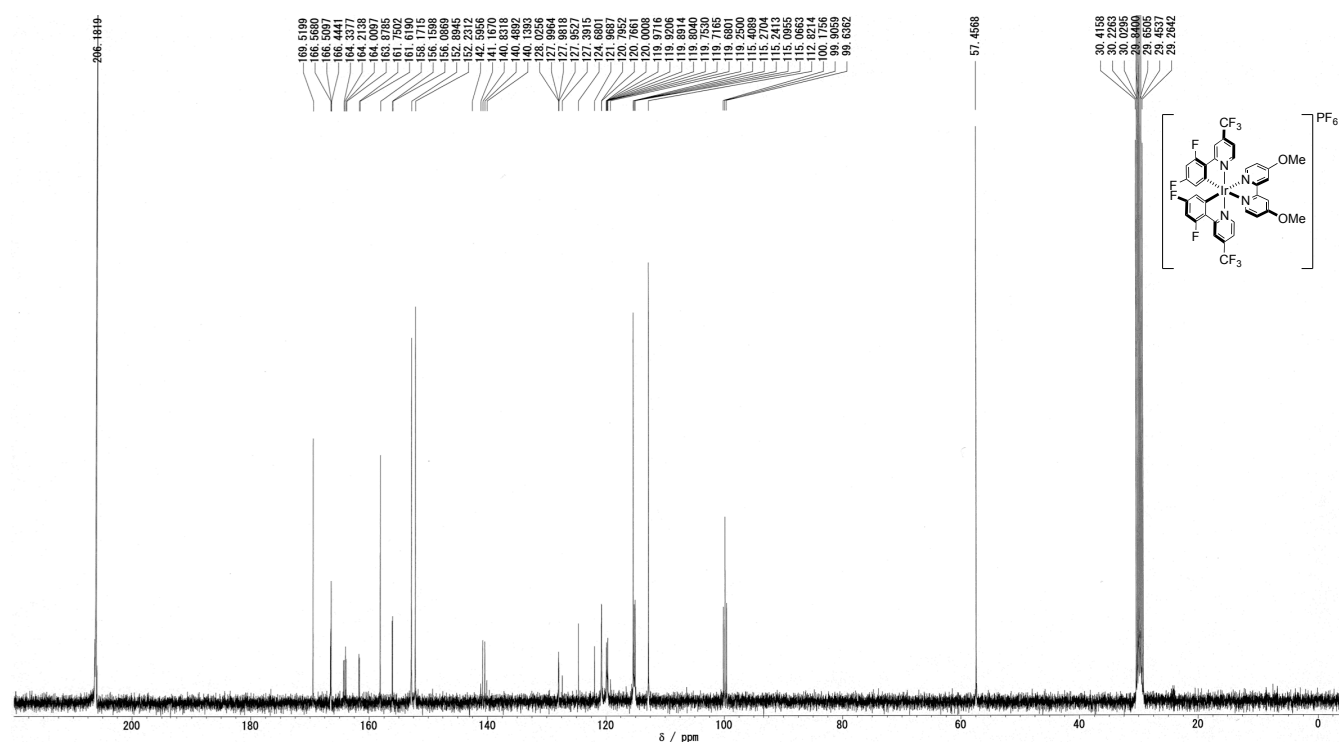

$^{19}\text{F}$  NMR spectrum of (4,4'-Dimethoxy-2,2'-bipyridine)bis[3,5-difluoro-2-[4-trifluoromethyl-2-pyridinyl- $\kappa N$ ]phenyl- $\kappa C$ ]iridium(III) hexafluorophosphate (**IX**)

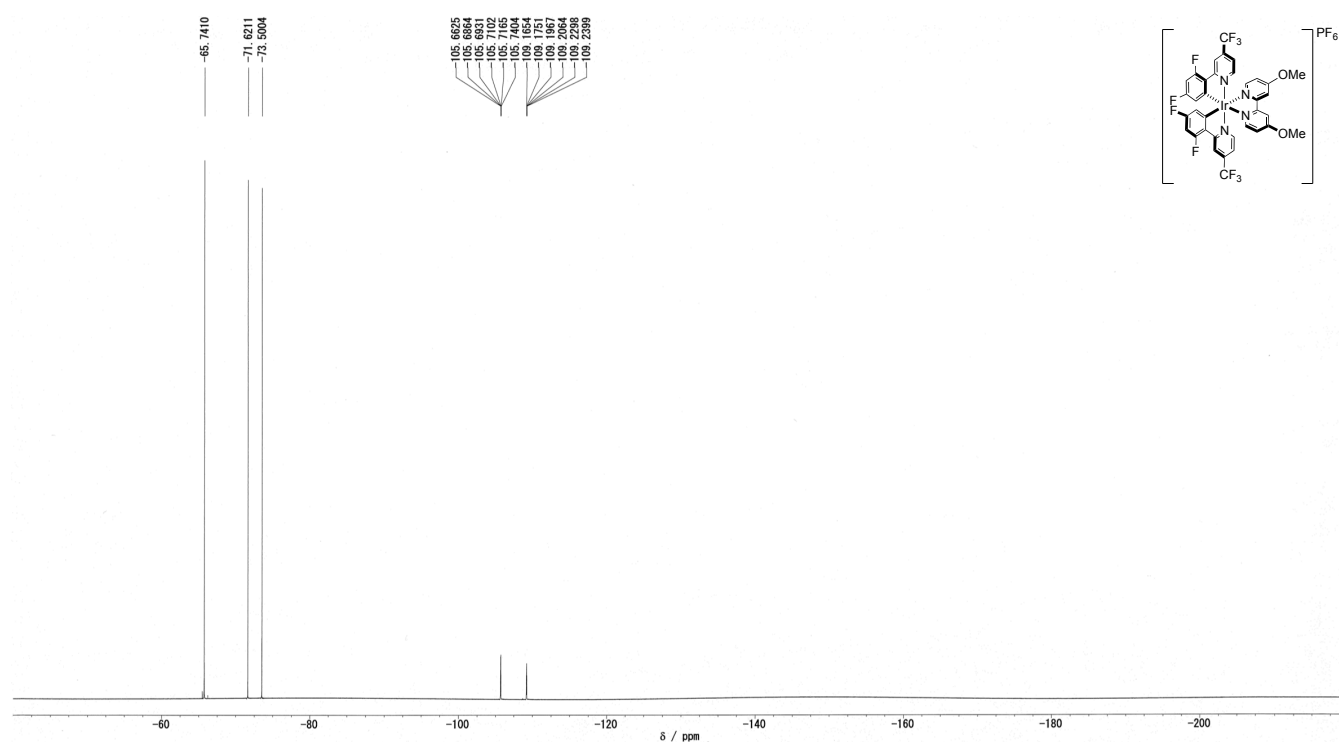

<sup>1</sup>H NMR spectrum of (±)-2-benzyl-5-methyl-3-phenyl-1,2,5-oxadiazinane (**3aa**)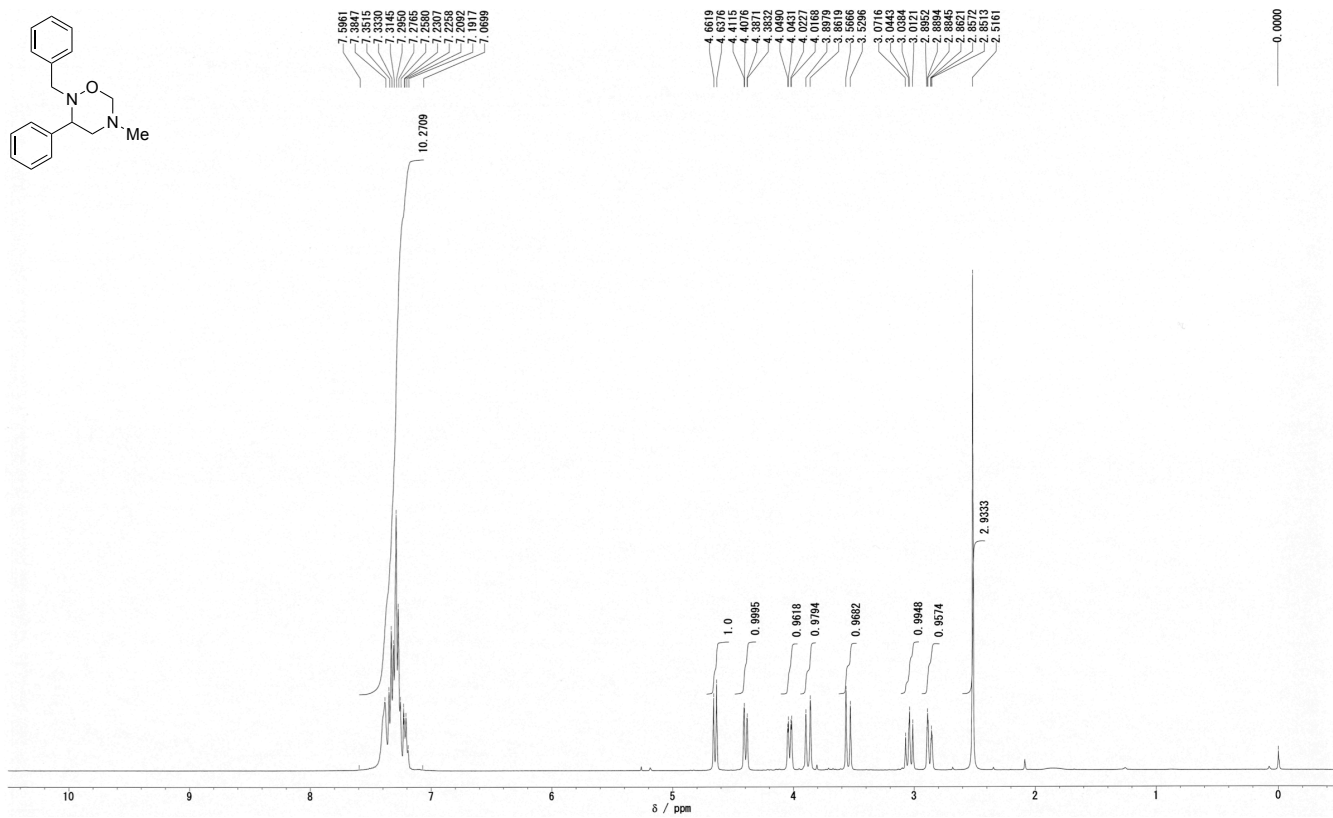

<sup>13</sup>C NMR spectrum of (±)-2-benzyl-5-methyl-3-phenyl-1,2,5-oxadiazinane (**3aa**)

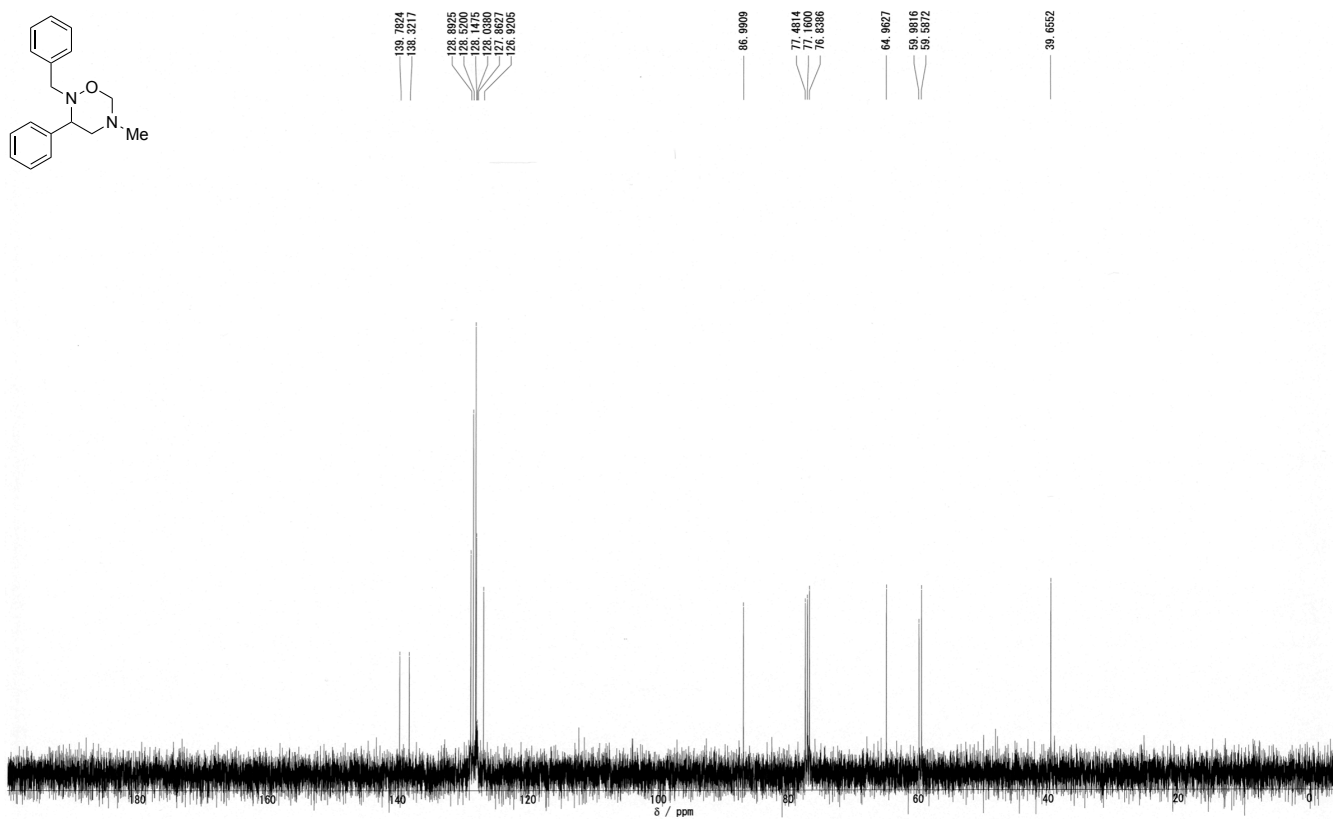



<sup>1</sup>H NMR spectrum of (±)-2-benzyl-5-methyl-3-(4-(trifluoromethyl)phenyl)-1,2,5-oxadiazinane (**3ba**)

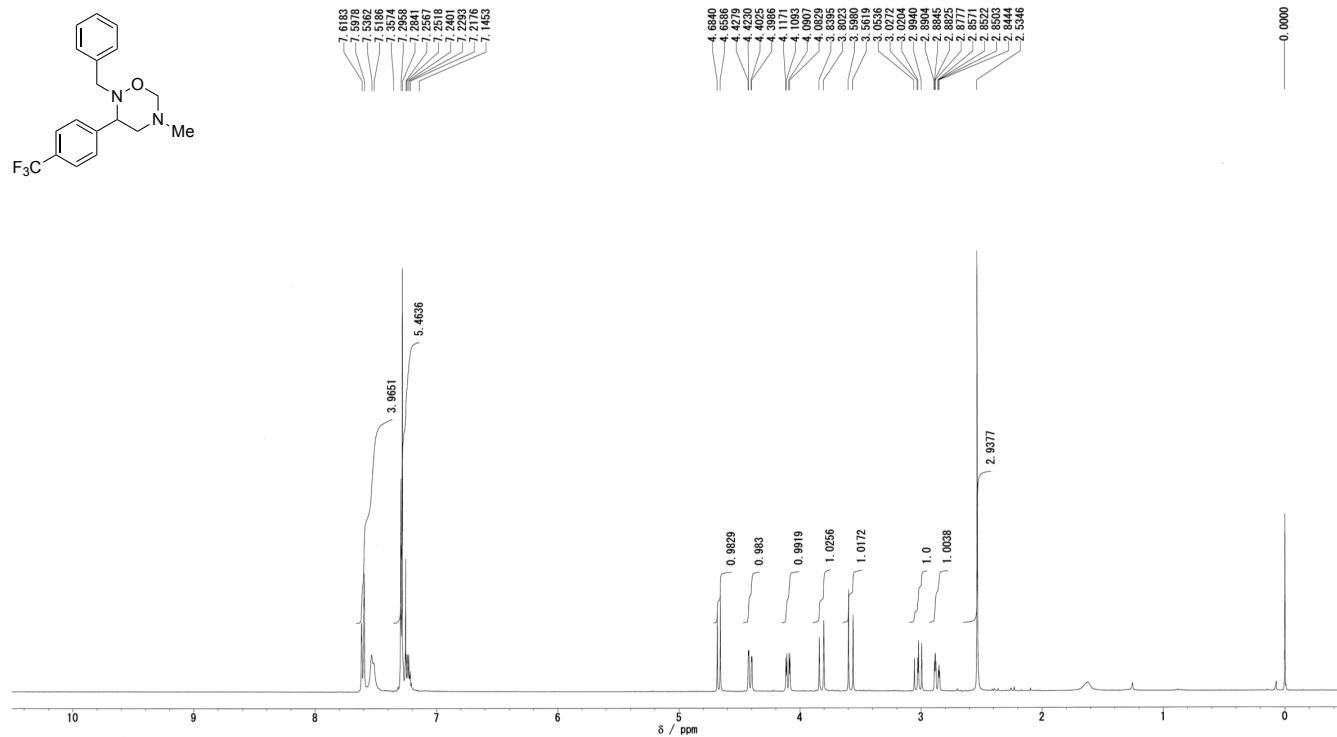

<sup>13</sup>C NMR spectrum of (±)-2-benzyl-5-methyl-3-(4-(trifluoromethyl)phenyl)-1,2,5-oxadiazinane (**3ba**)

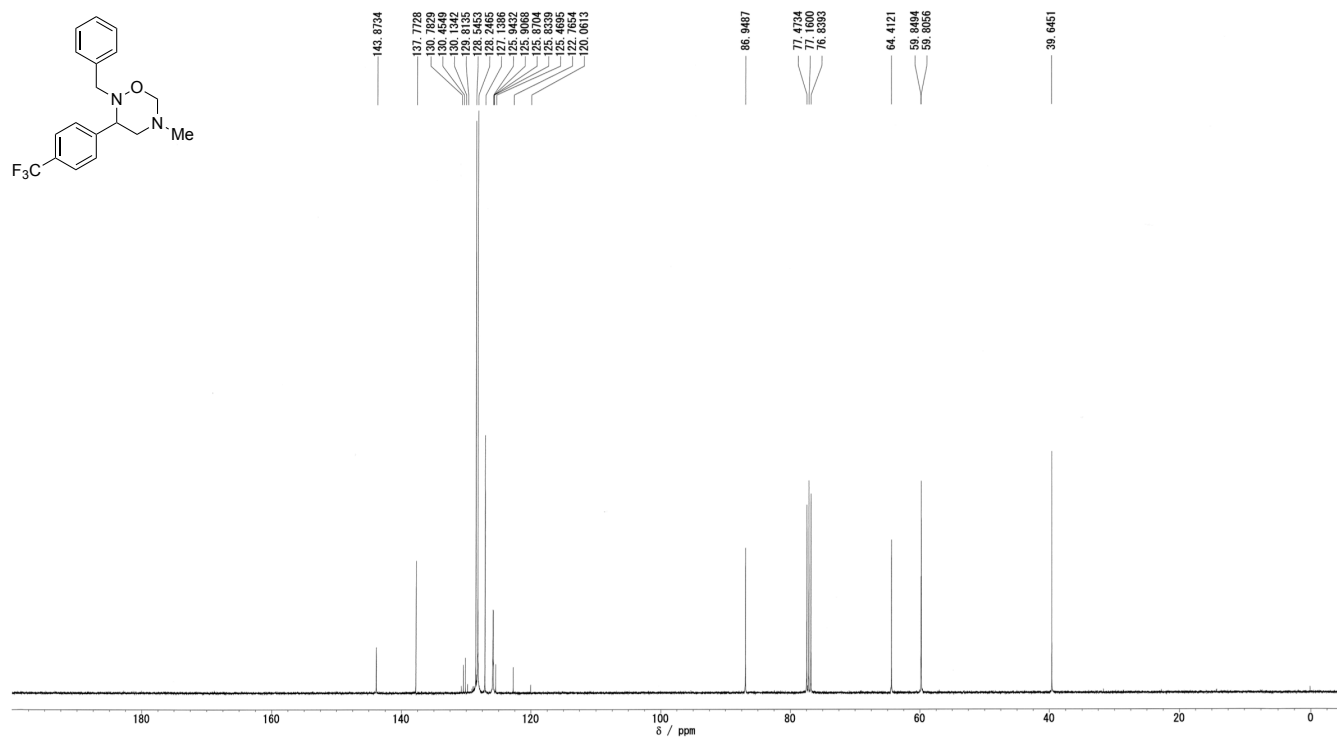

<sup>19</sup>F NMR spectrum of (±)-2-benzyl-5-methyl-3-(4-(trifluoromethyl)phenyl)-1,2,5-oxadiazinane (**3ba**)

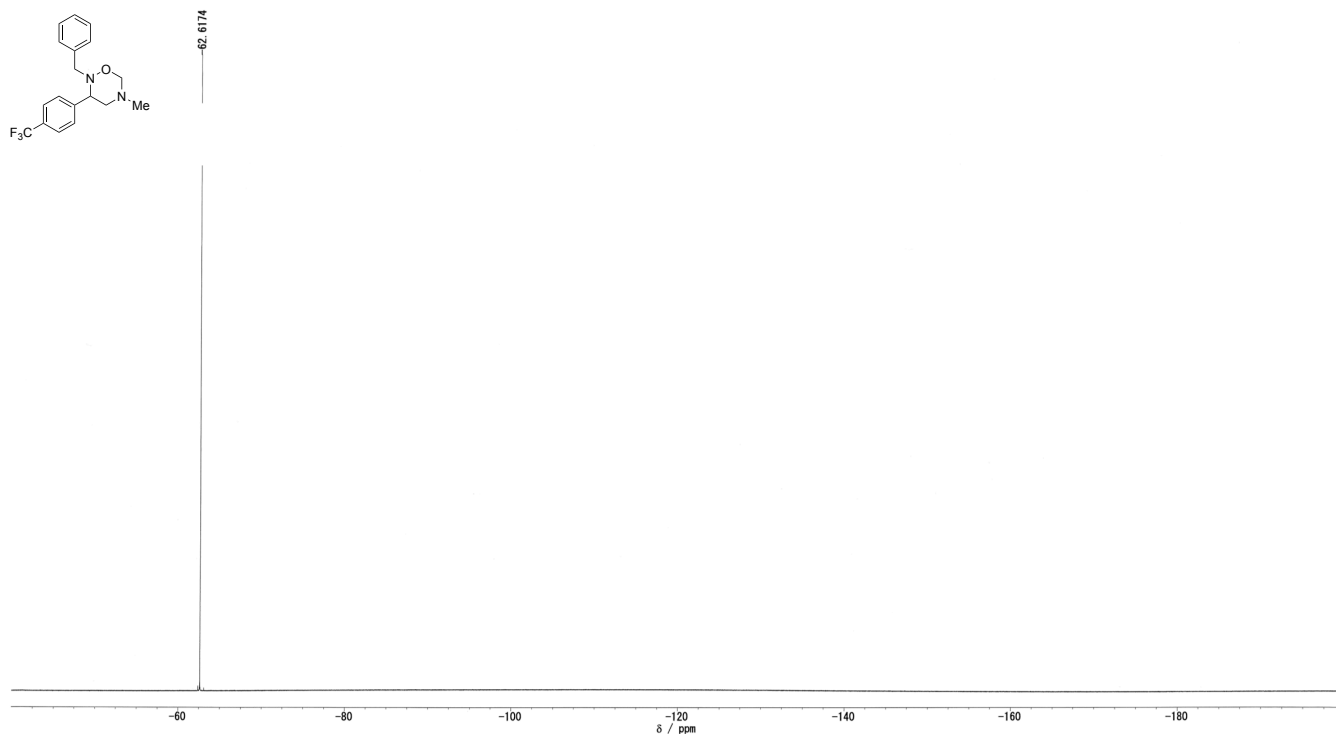

<sup>1</sup>H NMR spectrum of (±)-2-benzyl-3-(4-bromophenyl)-5-methyl-1,2,5-oxadiazinane (**3ca**)

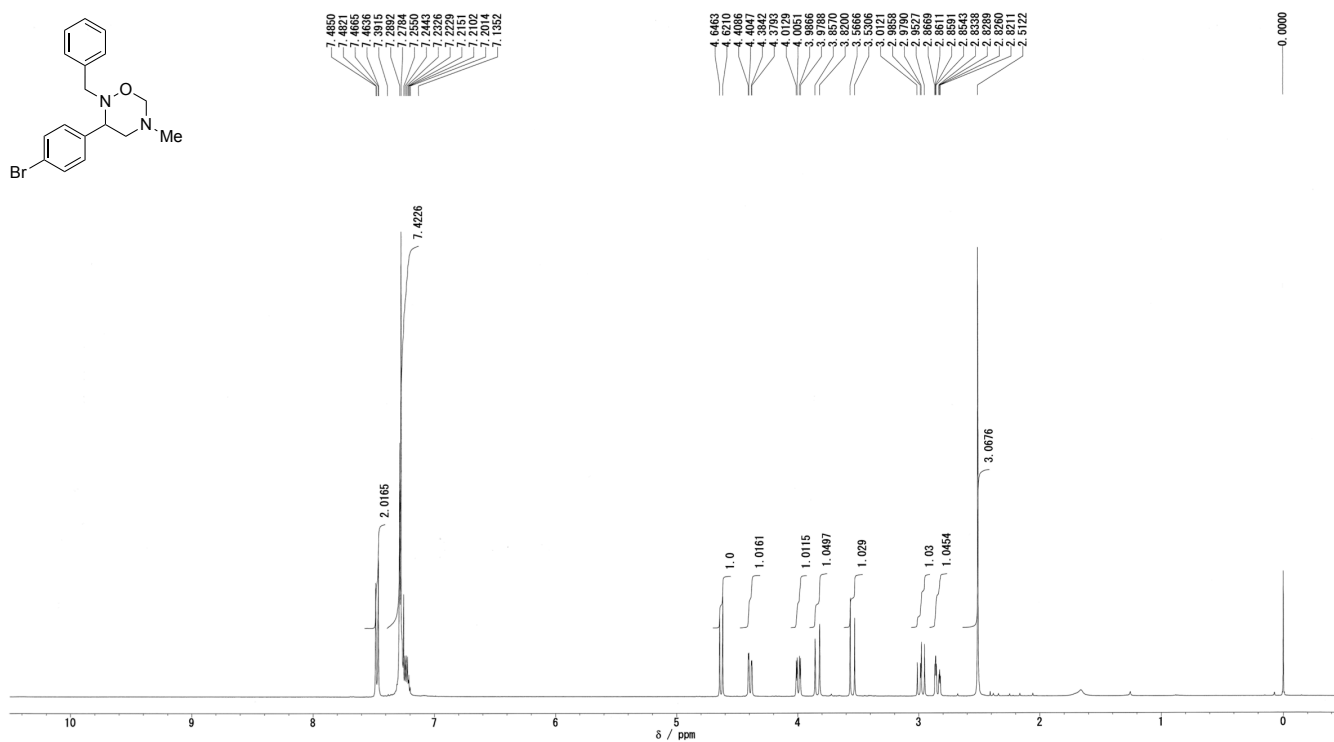

<sup>13</sup>C NMR spectrum of (±)-2-benzyl-3-(4-bromophenyl)-5-methyl-1,2,5-oxadiazinane (**3ca**)

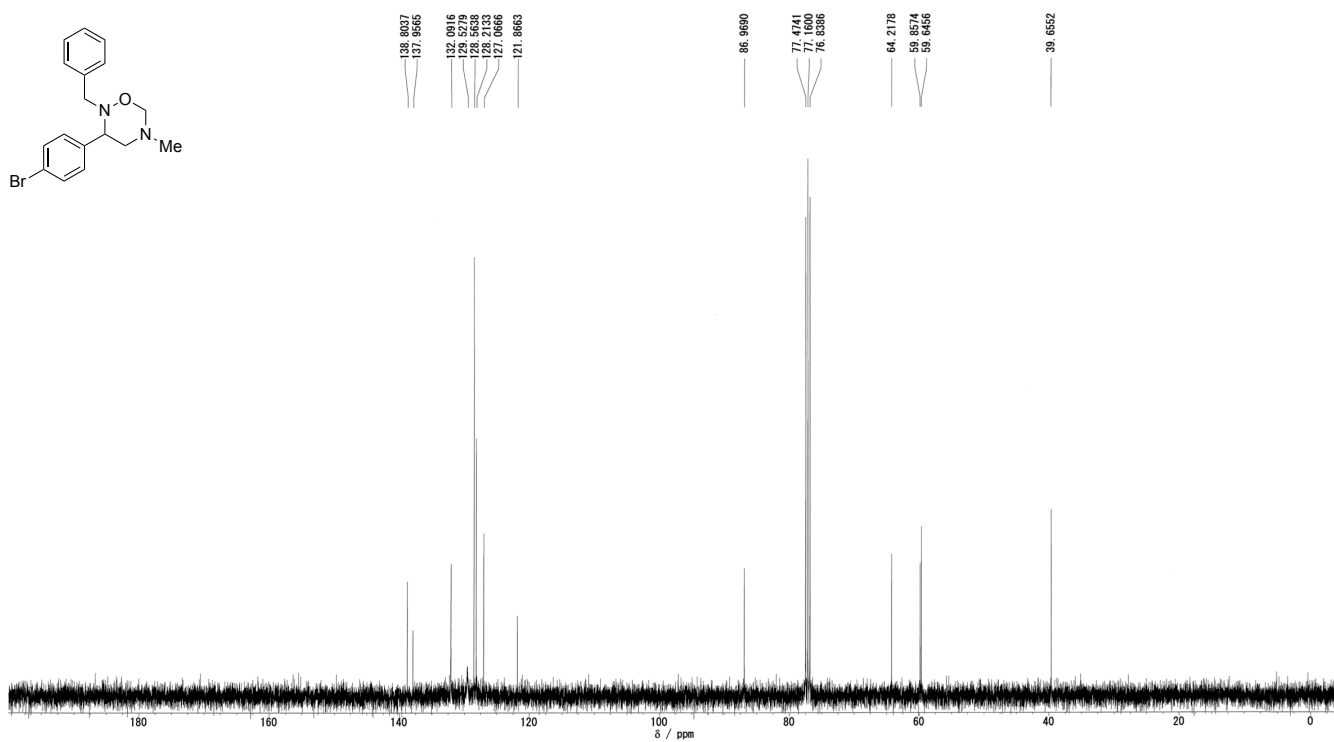

<sup>1</sup>H NMR spectrum of (±)-2-benzyl-3-(4-methoxyphenyl)-5-methyl-1,2,5-oxadiazinane (**3da**)

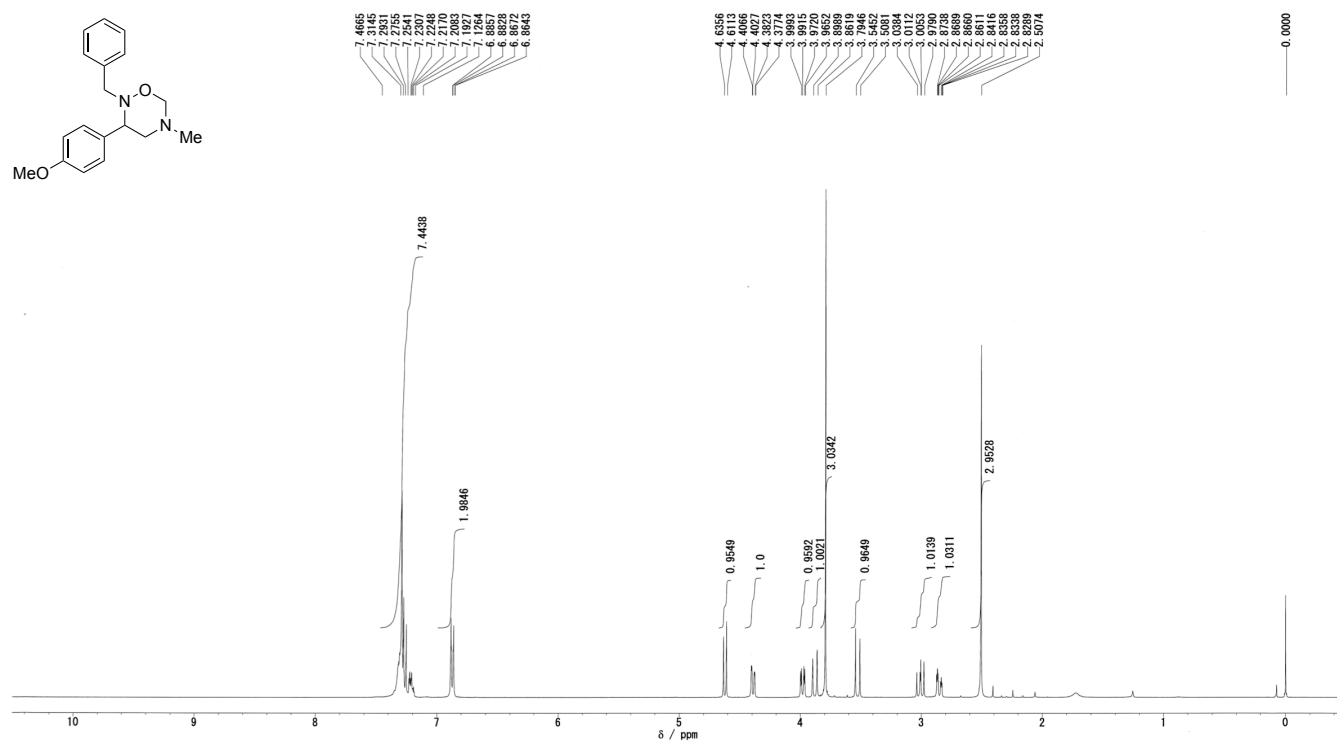

<sup>13</sup>C NMR spectrum of (±)-2-benzyl-3-(4-methoxyphenyl)-5-methyl-1,2,5-oxadiazinane (**3da**)

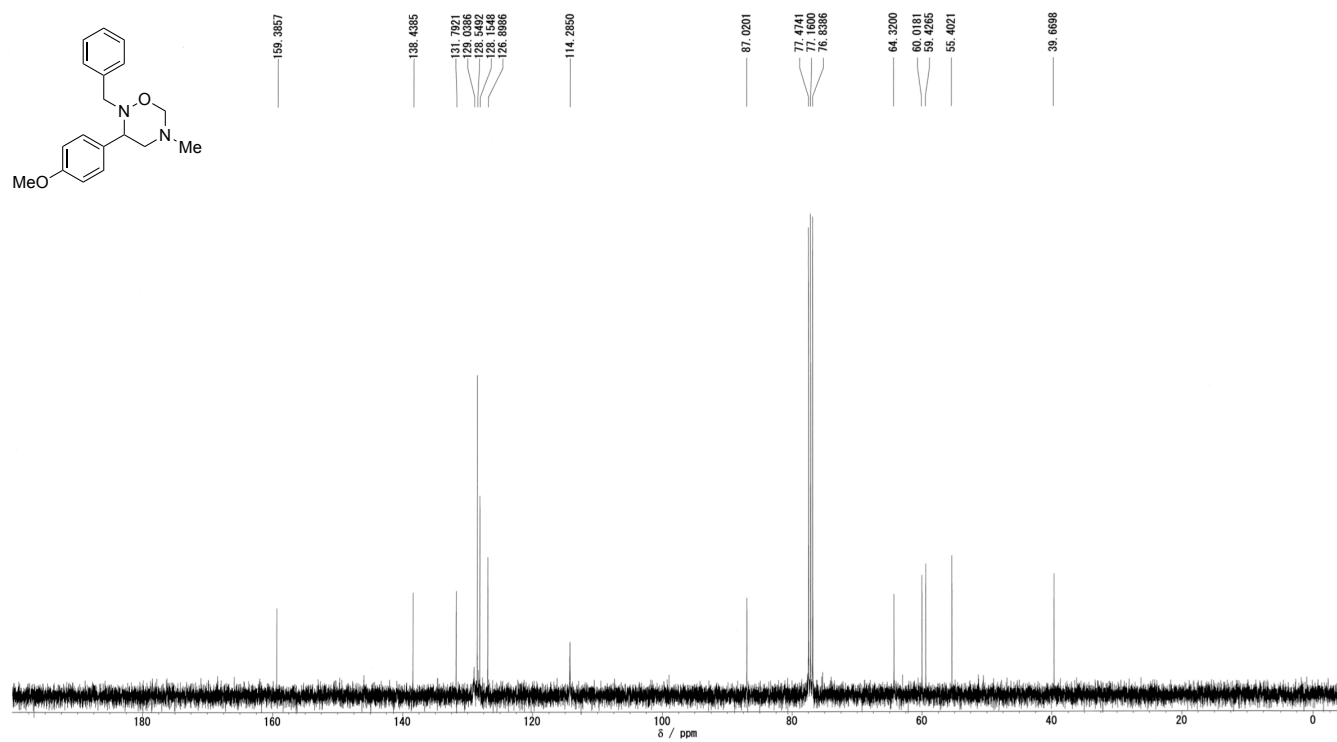

<sup>1</sup>H NMR spectrum of (±)-2-benzyl-5-methyl-3-(pyridin-2-yl)-1,2,5-oxadiazinane (**3ea**)

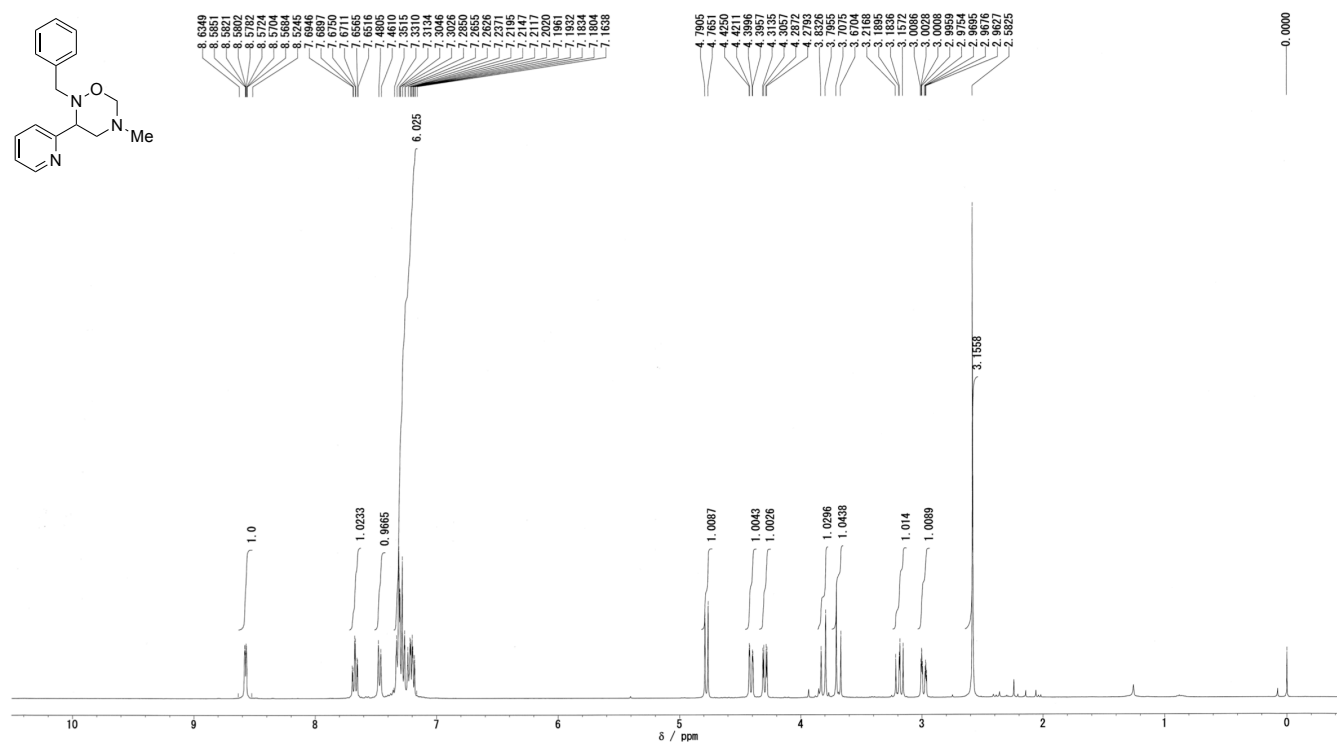

<sup>13</sup>C NMR spectrum of (±)-2-benzyl-5-methyl-3-(pyridin-2-yl)-1,2,5-oxadiazinane (**3ea**)

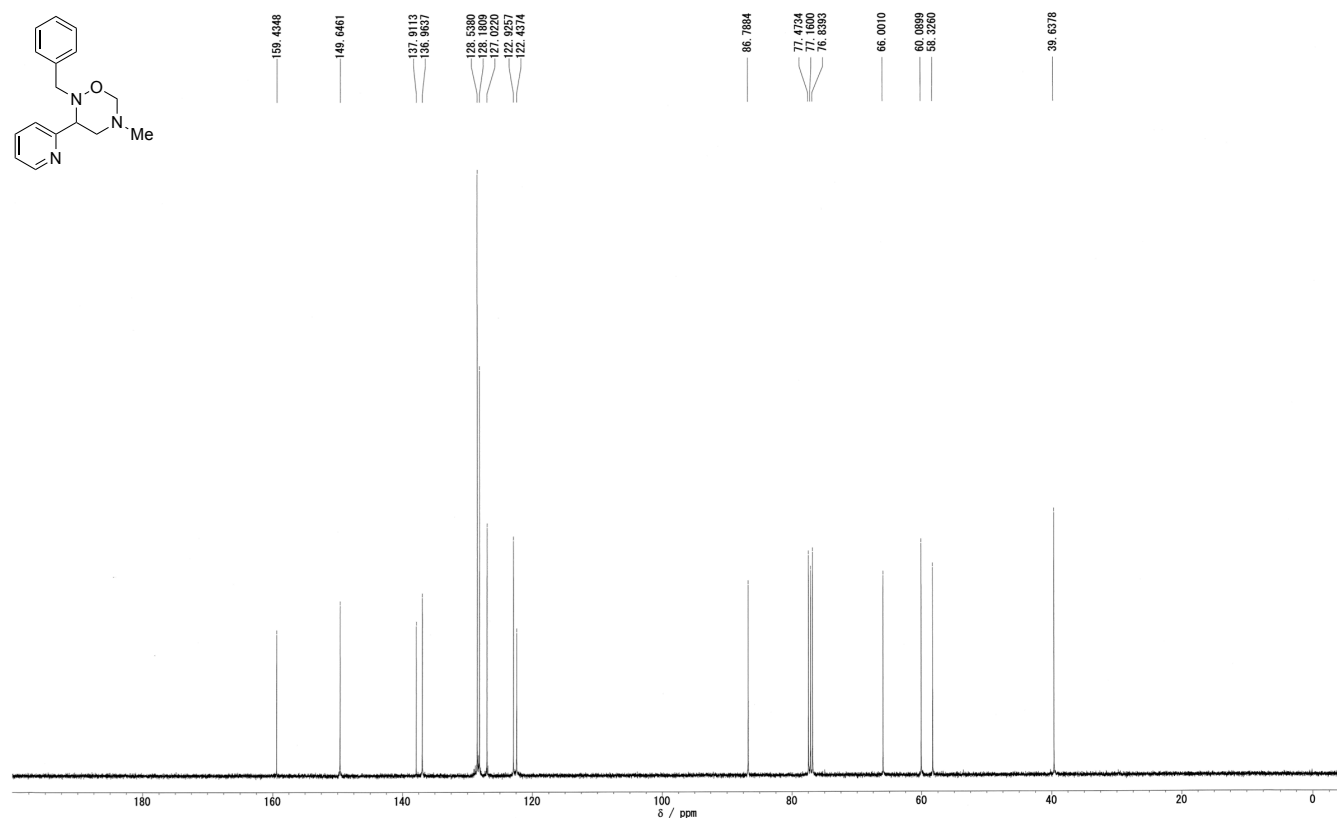

<sup>1</sup>H NMR spectrum of (±)-2-benzyl-5-methyl-3-(thiophen-2-yl)-1,2,5-oxadiazinane (**3fa**)

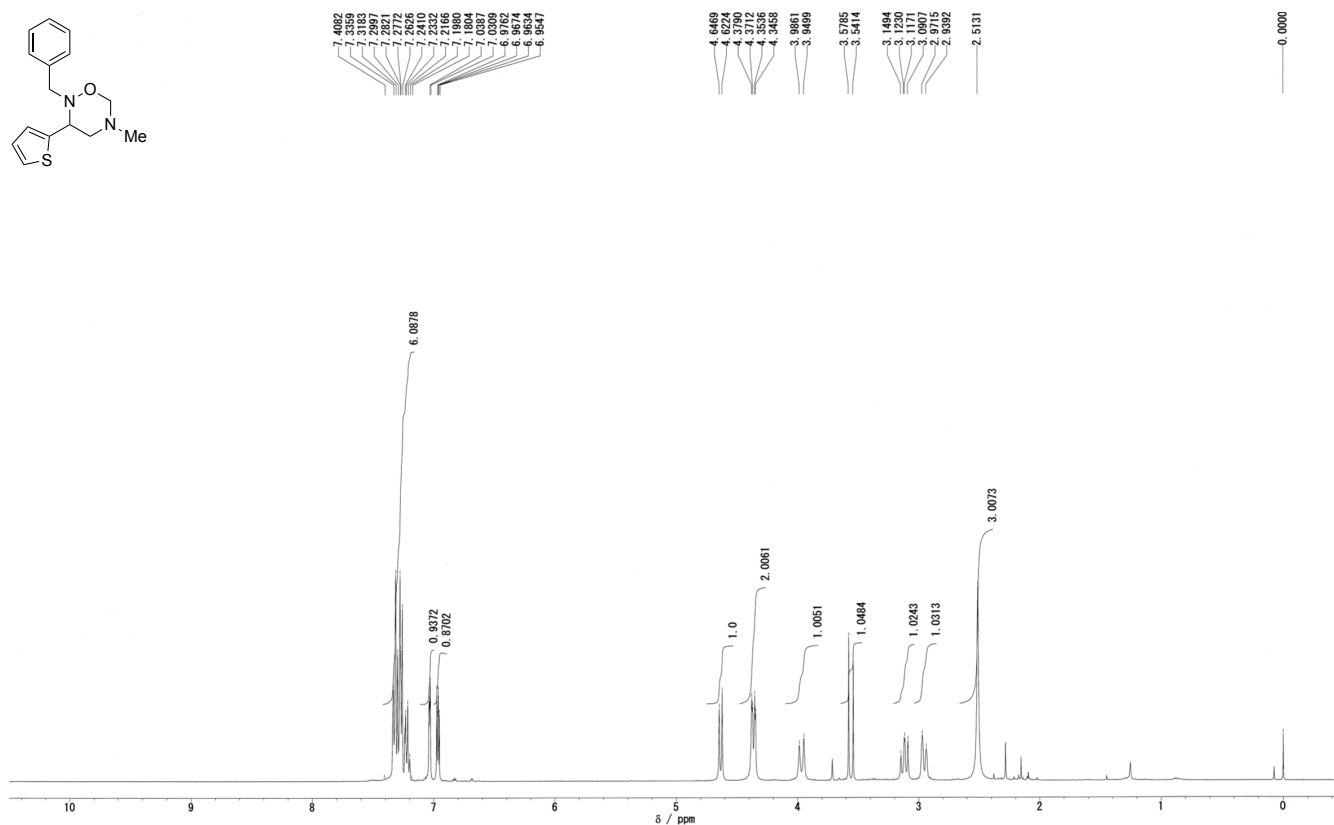

<sup>13</sup>C NMR spectrum of (±)-2-benzyl-5-methyl-3-(thiophen-2-yl)-1,2,5-oxadiazinane (**3fa**)

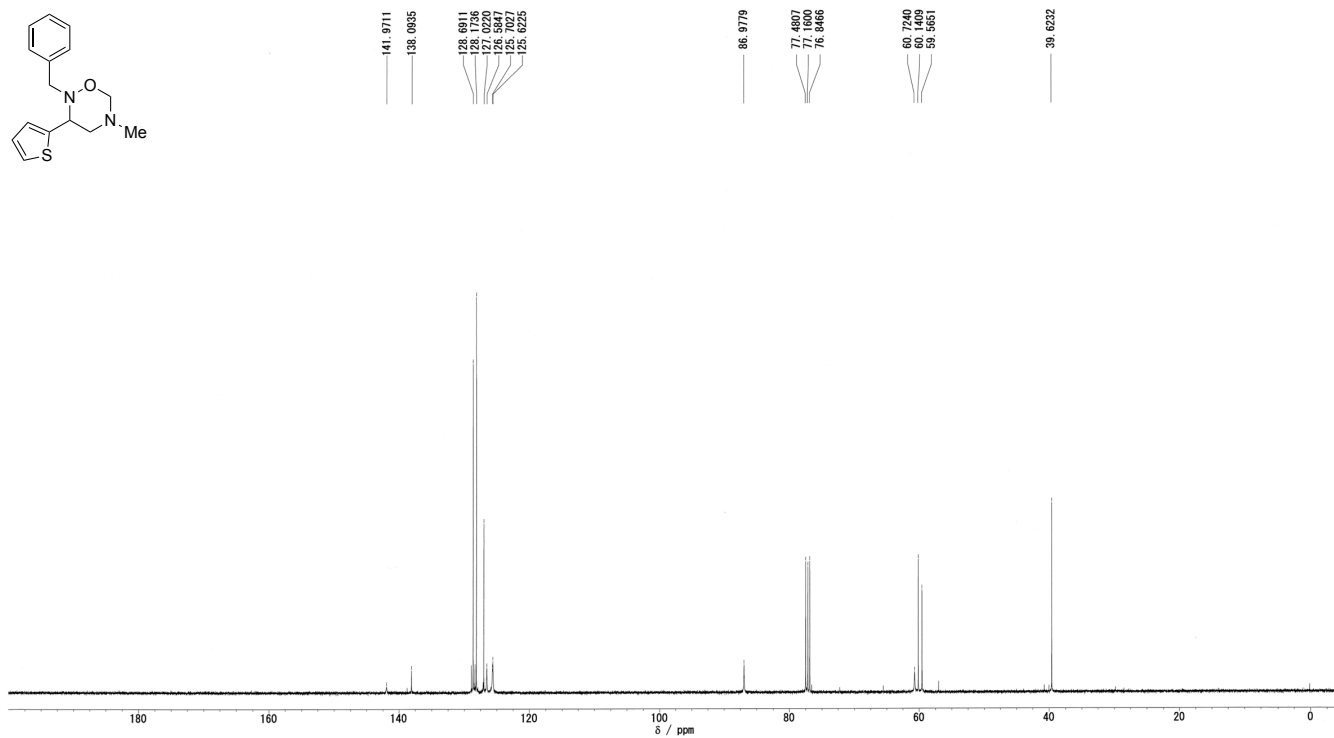

<sup>1</sup>H NMR spectrum of (±)-2-benzyl-3-(furan-2-yl)-5-methyl-1,2,5-oxadiazinane (**3ga**)

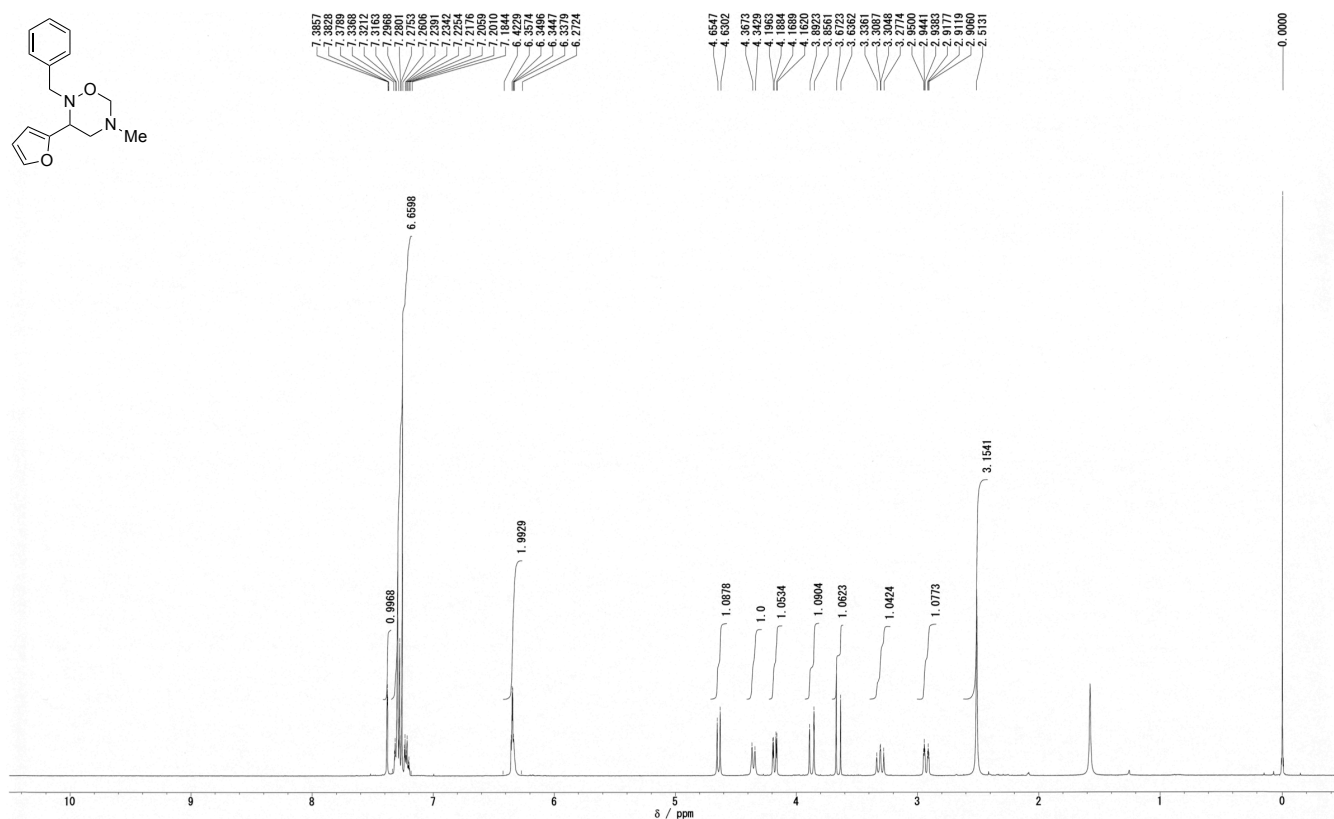

<sup>13</sup>C NMR spectrum of (±)-2-benzyl-3-(furan-2-yl)-5-methyl-1,2,5-oxadiazinane (**3ga**)

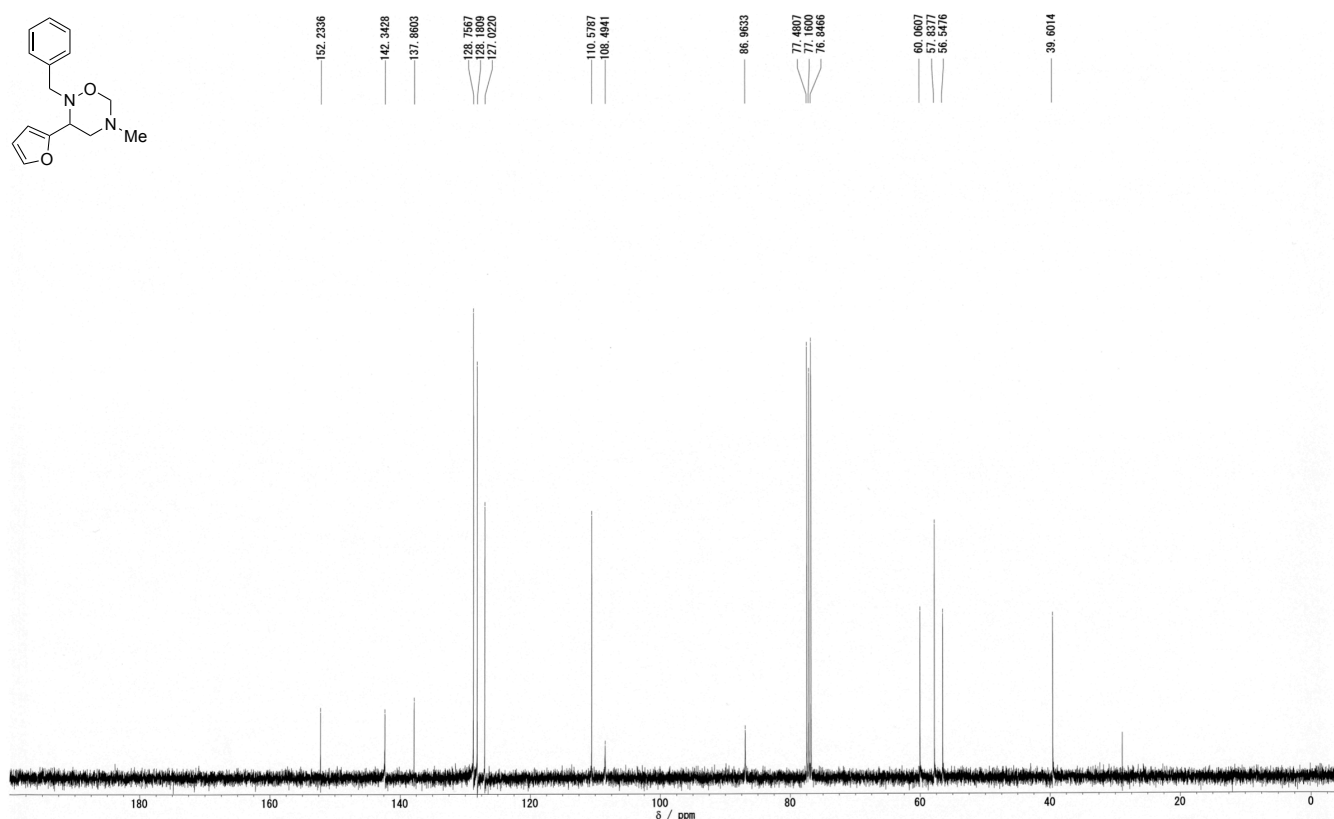

<sup>1</sup>H NMR spectrum of (±)-2-methyl-1,2,3,6,7,11b-hexahydro-[1,2,5]oxadiazino[3,2-a]isoquinoline (**3ta**)

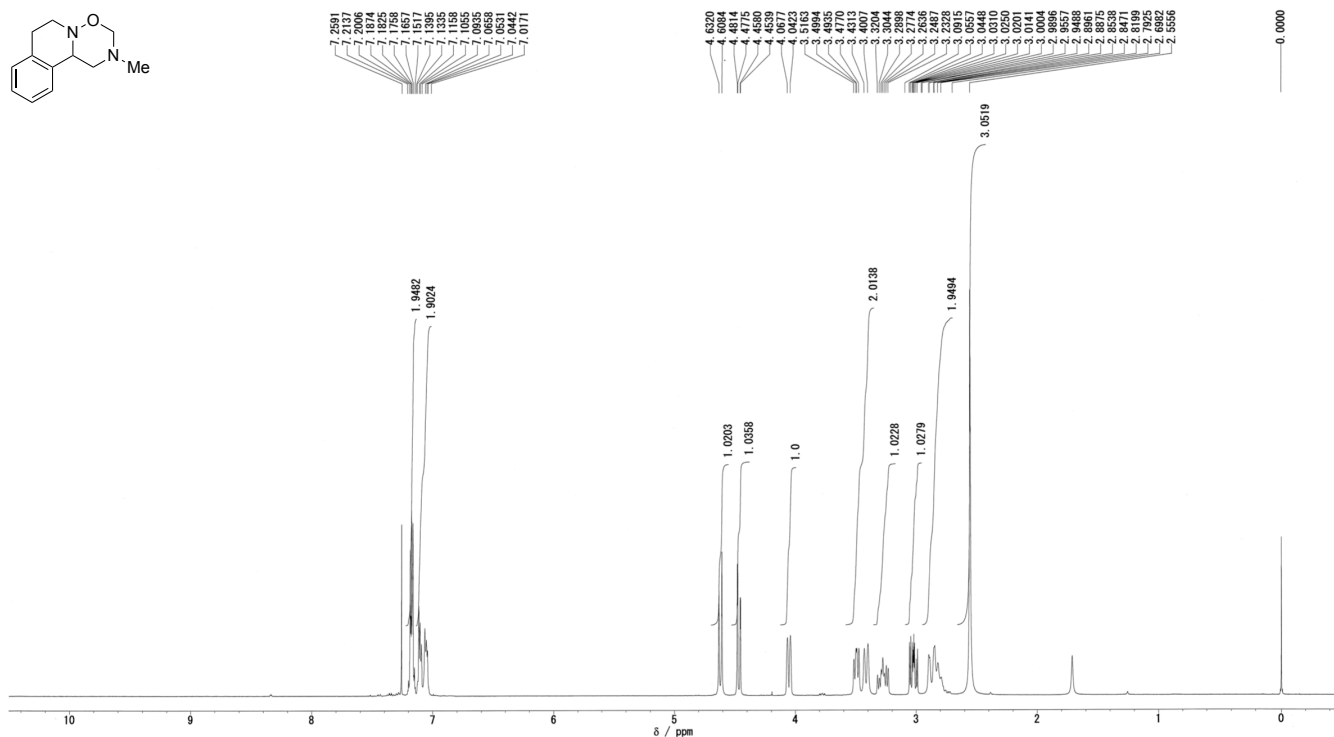

<sup>13</sup>C NMR spectrum of (±)-2-methyl-1,2,3,6,7,11b-hexahydro-[1,2,5]oxadiazino[3,2-a]isoquinoline (**3ta**)

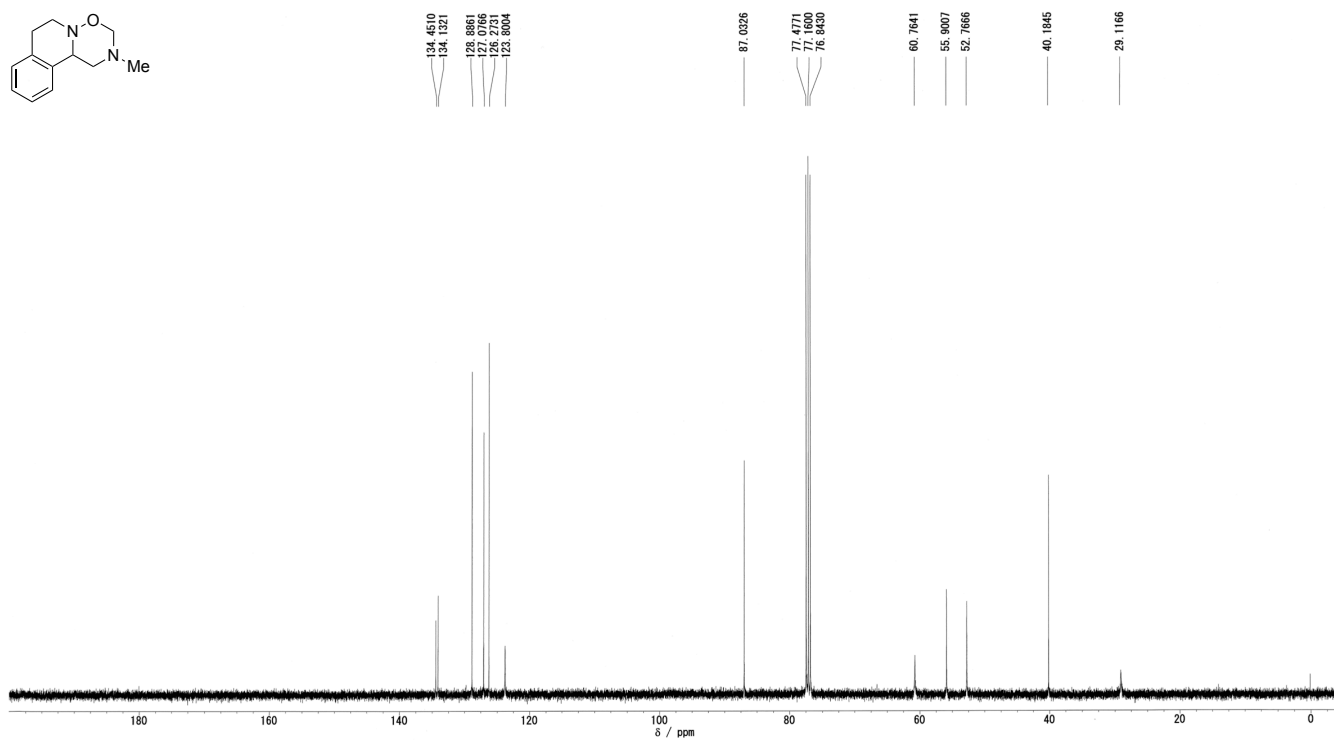



CN1CC2(C1)OC(C2)c3ccoc3Cc4ccccc4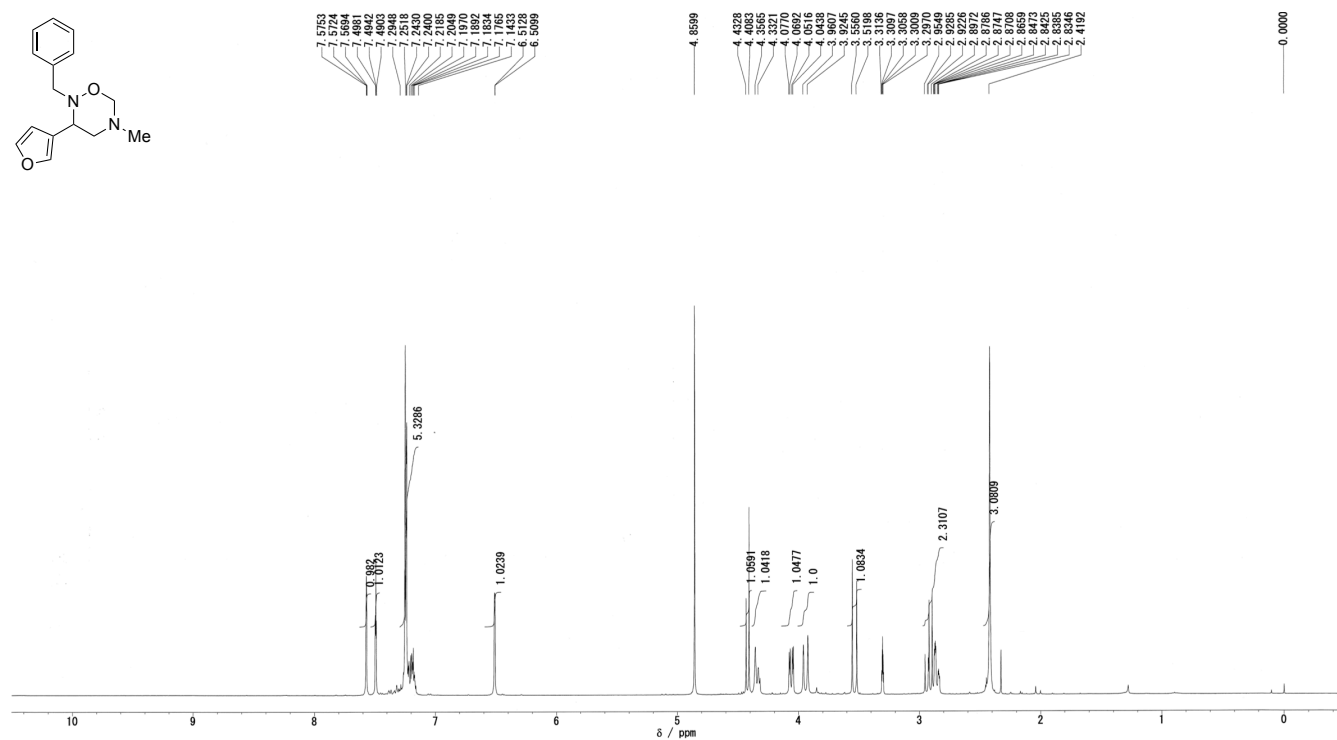CN1CC2C(C1)C3=CC=CC=C3O2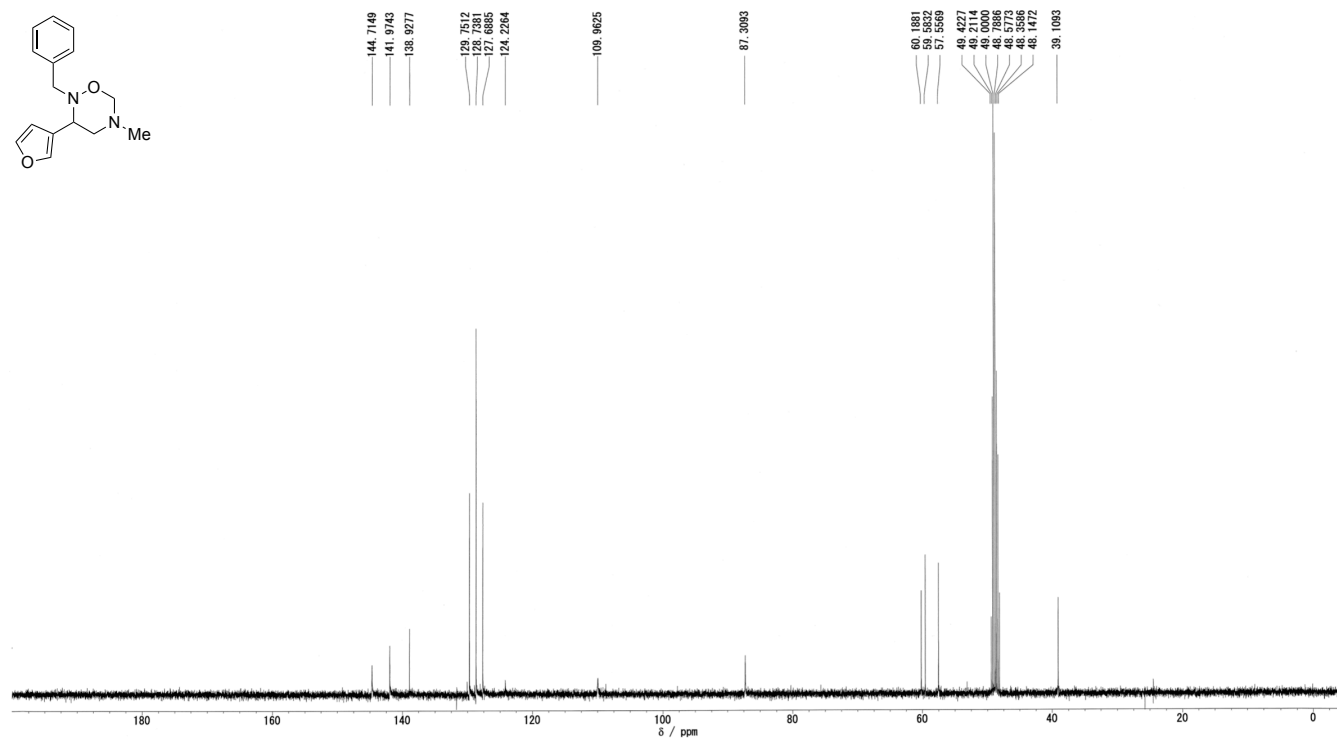

<sup>1</sup>H NMR spectrum of (±)-*tert*-butyl 2-(2-benzyl-5-methyl-1,2,5-oxadiazinan-3-yl)-1*H*-pyrrole-1-carboxylate (**3ia**)

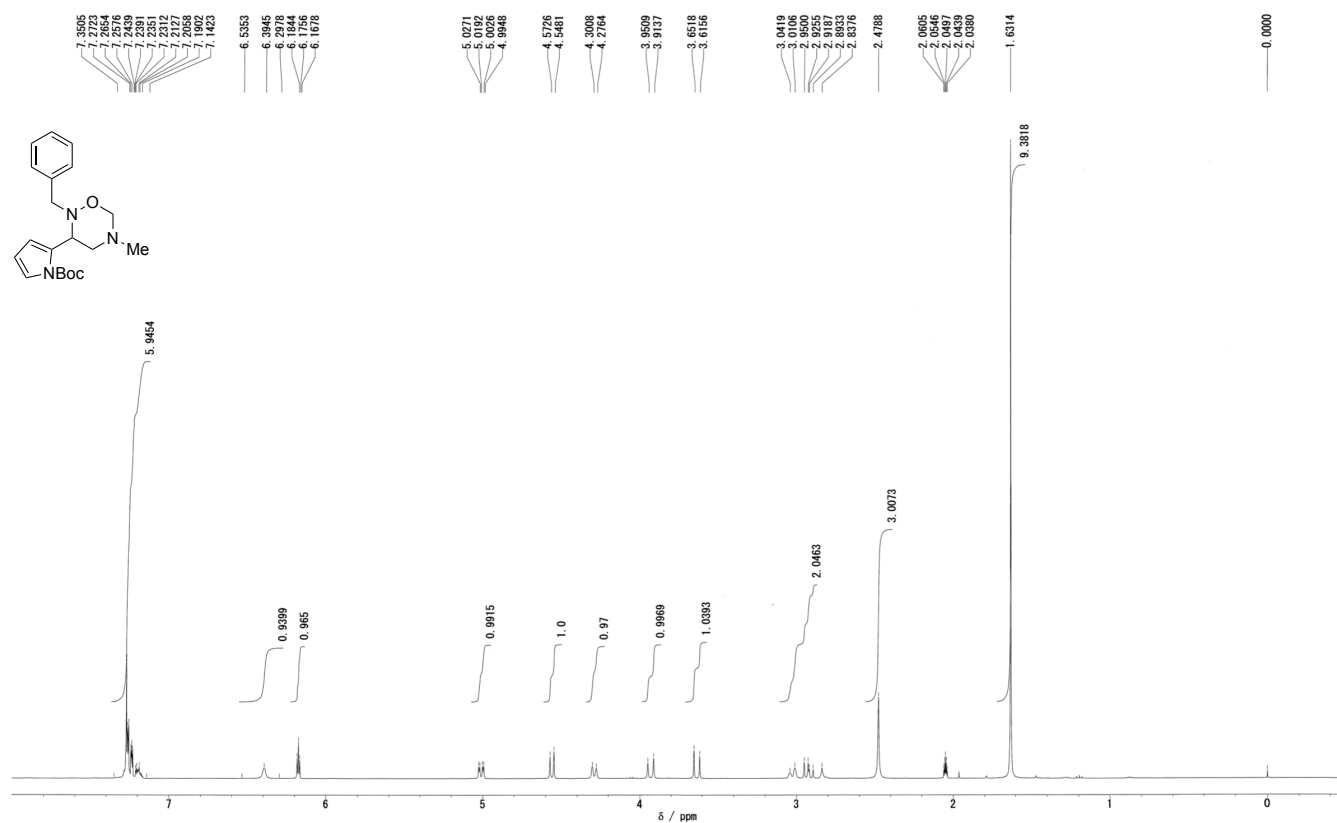

<sup>13</sup>C NMR spectrum of (±)-*tert*-butyl 2-(2-benzyl-5-methyl-1,2,5-oxadiazinan-3-yl)-1*H*-pyrrole-1-carboxylate (**3ia**)

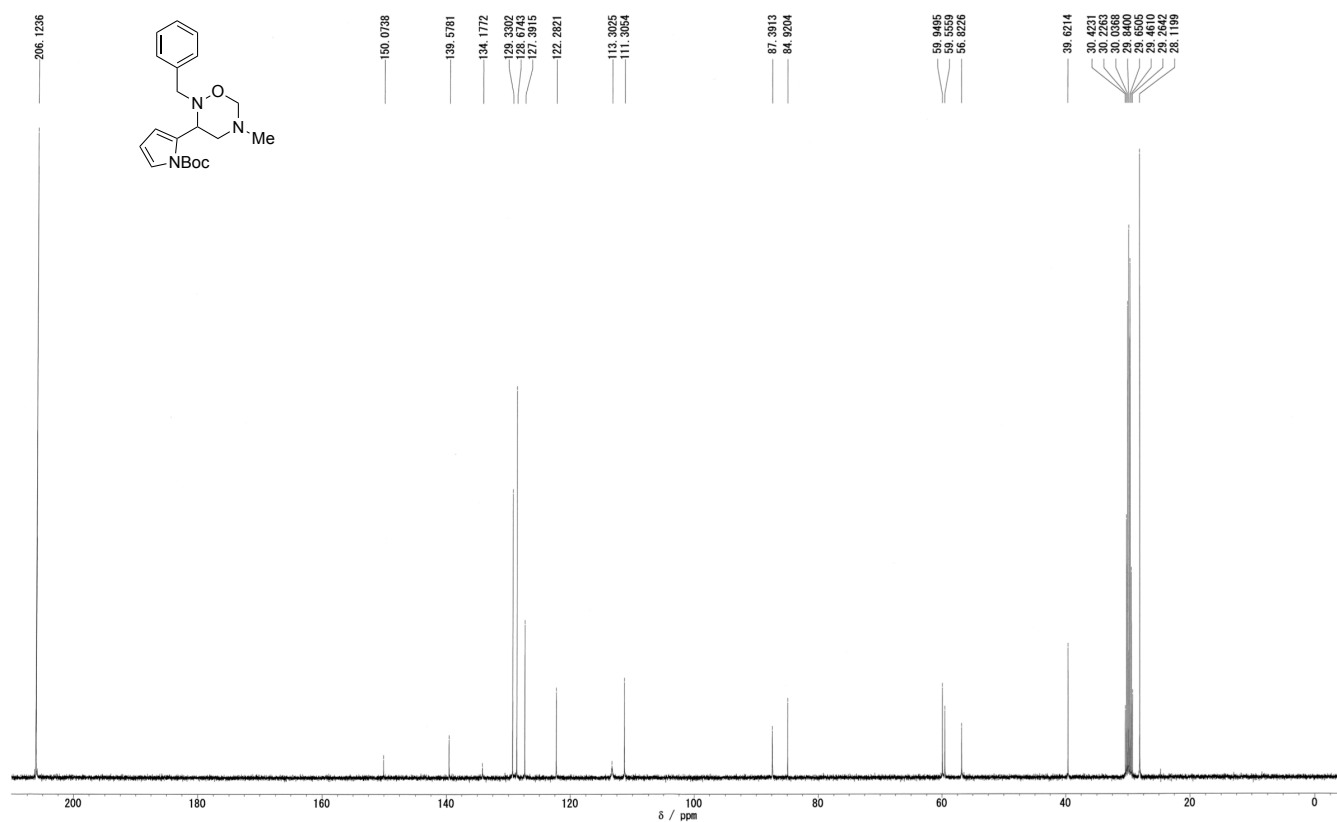

<sup>1</sup>H NMR spectrum of (±)-2-benzyl-5-methyl-3-(naphthalen-2-yl)-1,2,5-oxadiazinane (**3ja**)

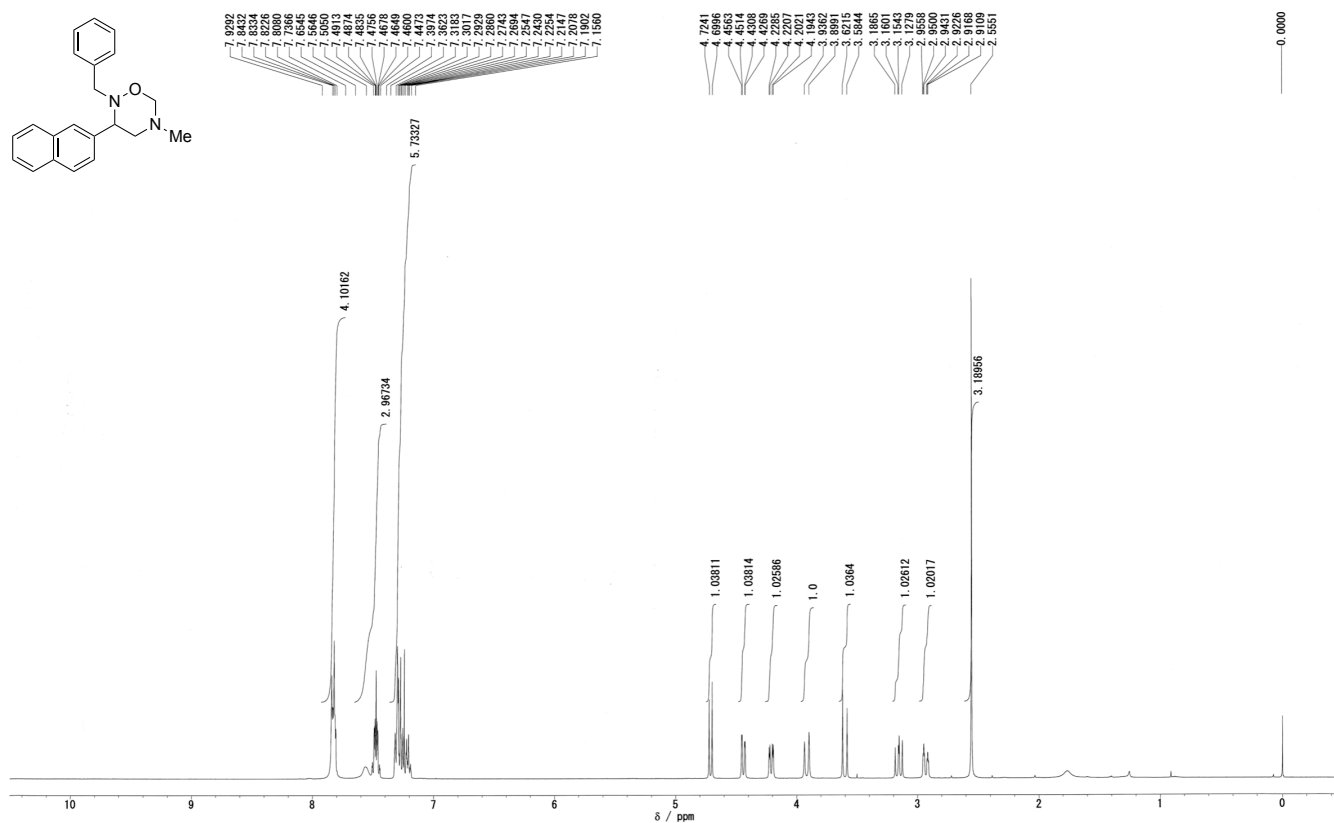

<sup>13</sup>C NMR spectrum of (±)-2-benzyl-5-methyl-3-(naphthalen-2-yl)-1,2,5-oxadiazinane (**3ja**)

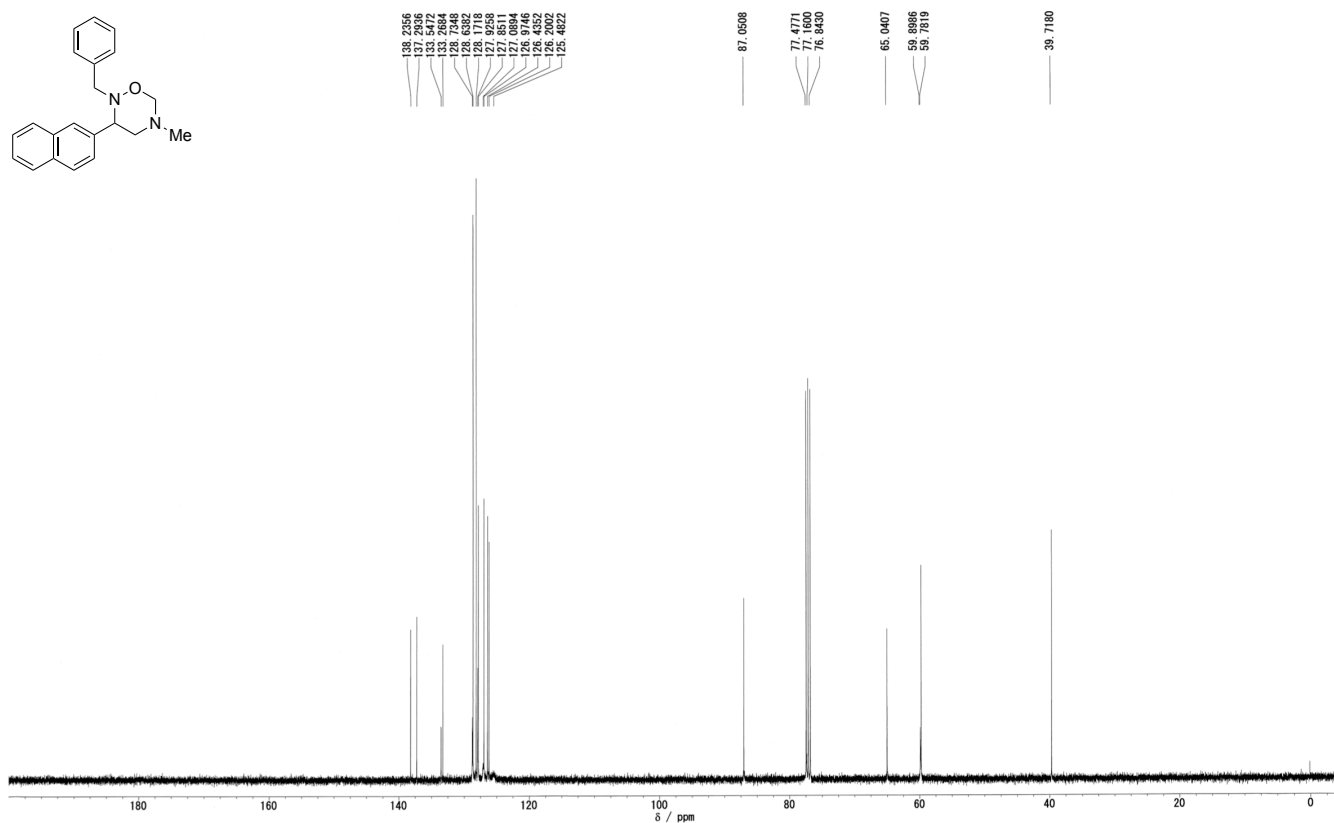

<sup>1</sup>H NMR spectrum of (±)-2-benzyl-5-methyl-3-(quinolin-4-yl)-1,2,5-oxadiazinane (**3ka**) at 80 °C

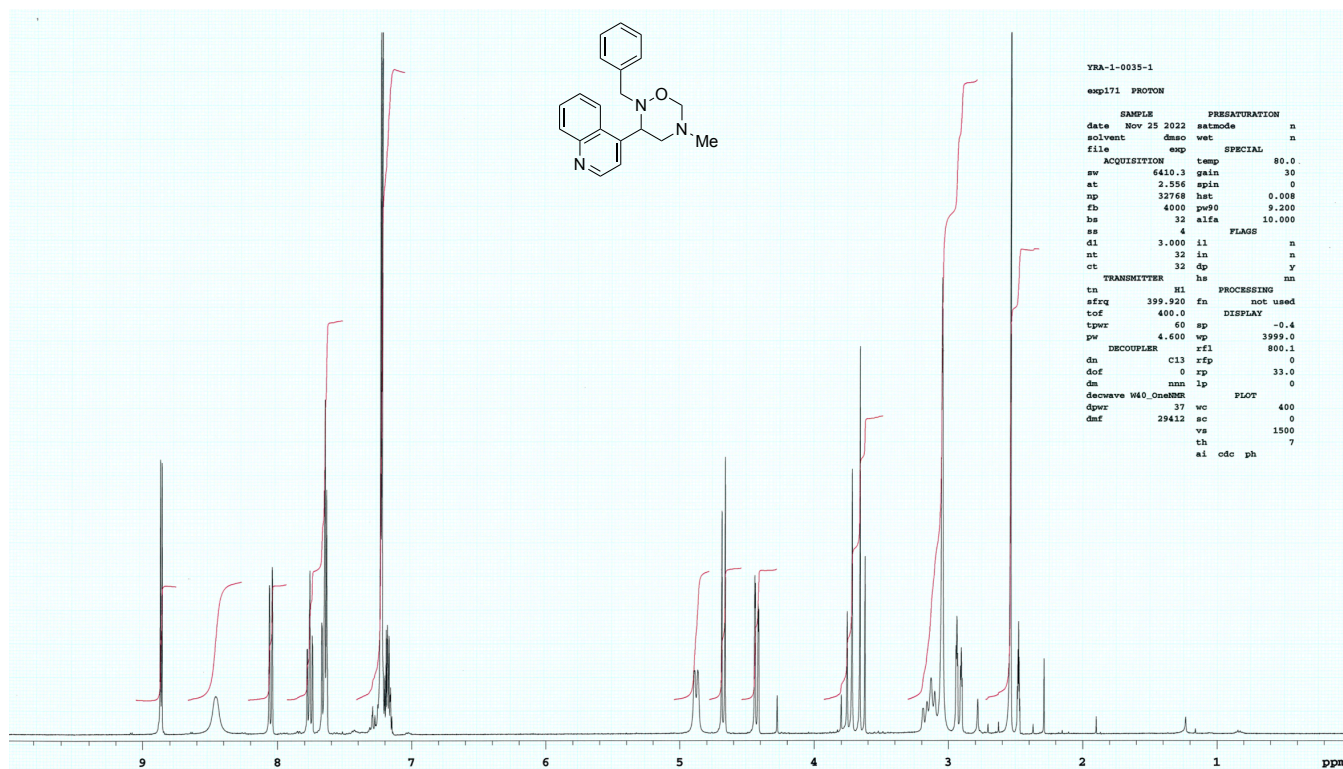

<sup>1</sup>H NMR spectrum of (±)-2-benzyl-5-methyl-3-(quinolin-4-yl)-1,2,5-oxadiazinane (**3ka**) at rt

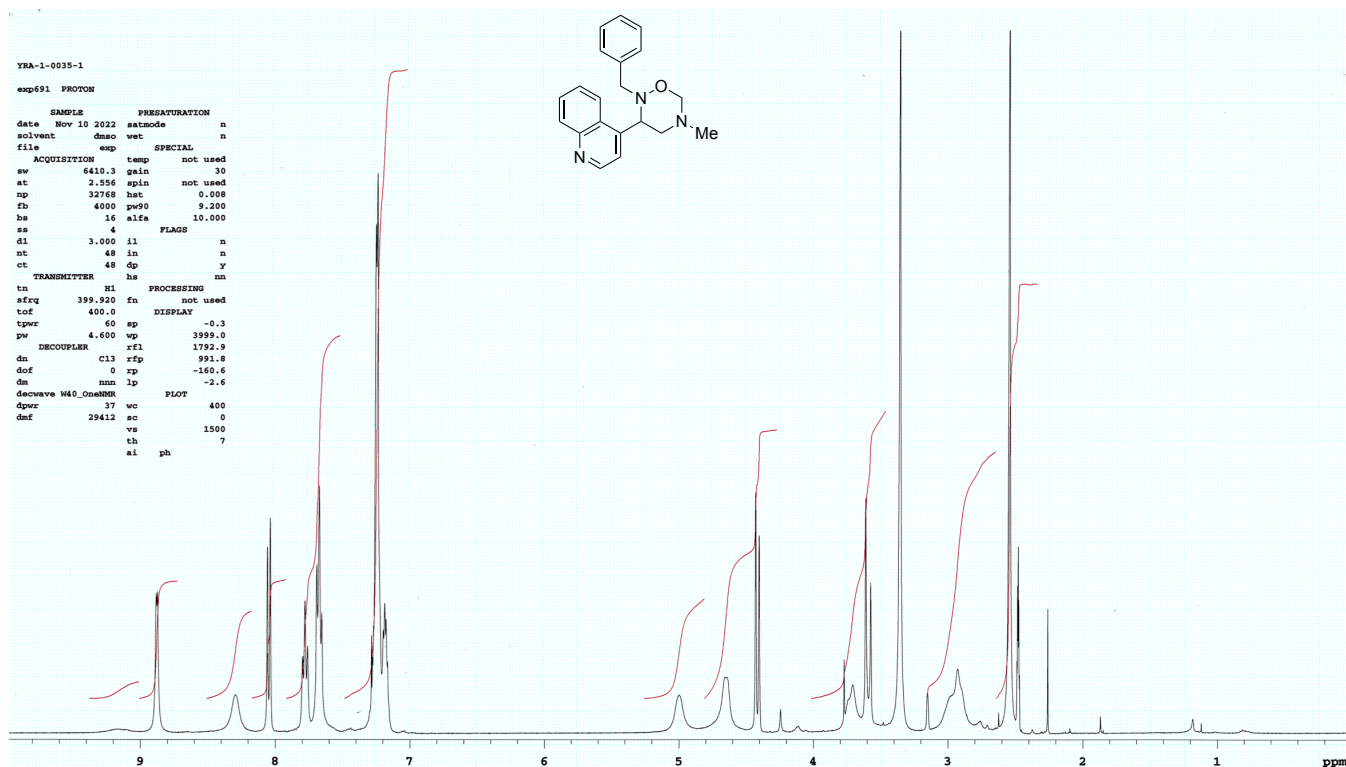



$^{13}\text{C}$  NMR spectrum of ( $\pm$ )-2-benzyl-5-methyl-3-(quinolin-4-yl)-1,2,5-oxadiazinane (**3ka**) at 80 °C

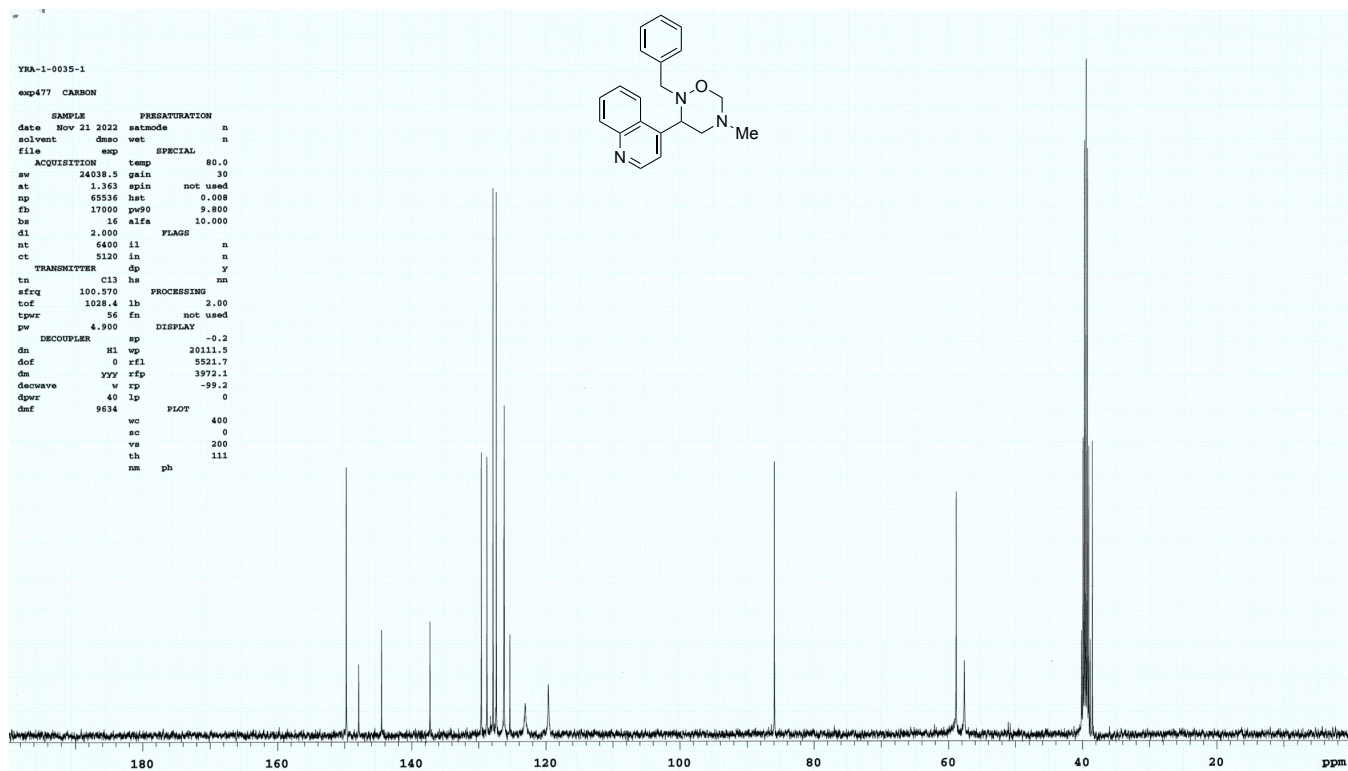

$^{13}\text{C}$  NMR spectrum of ( $\pm$ )-2-benzyl-5-methyl-3-(quinolin-4-yl)-1,2,5-oxadiazinane (**3ka**) at rt

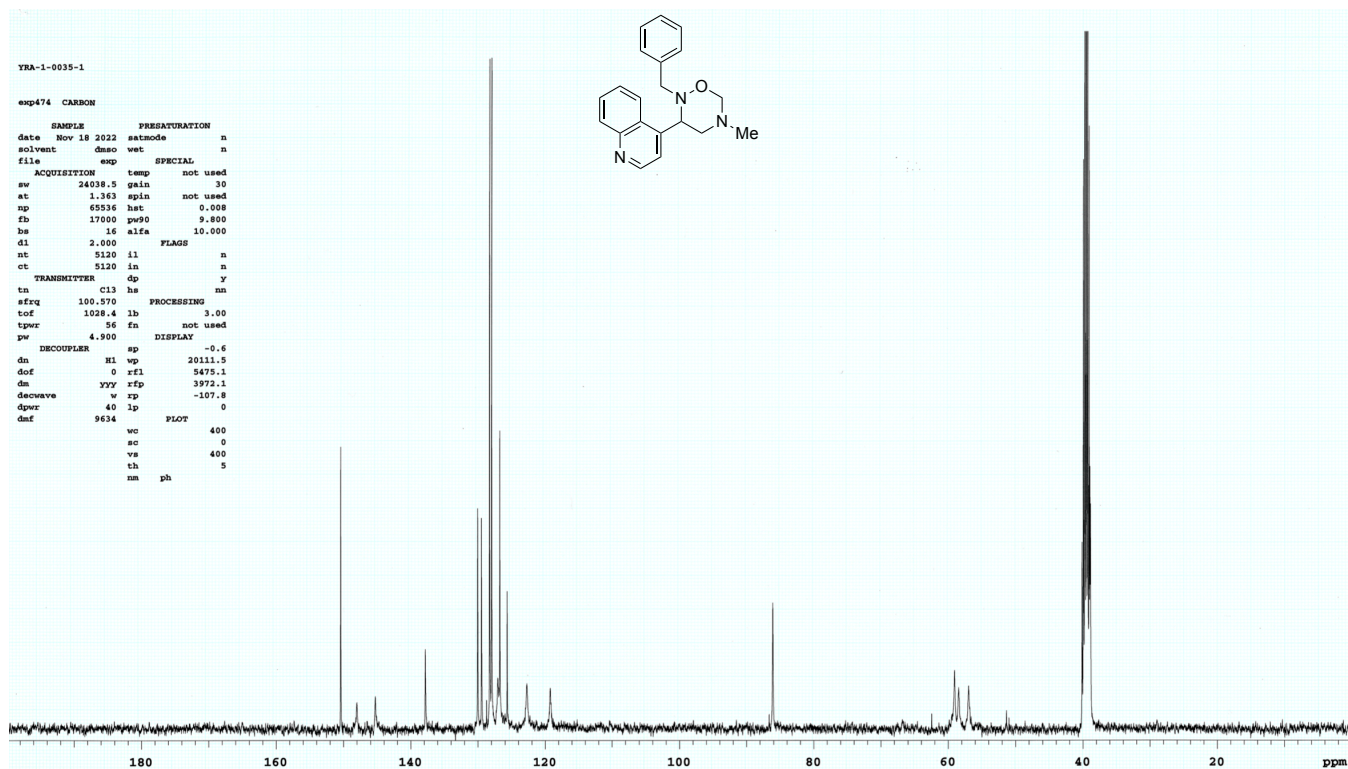

<sup>1</sup>H NMR spectrum of (±)-2-benzyl-3-cyclohexyl-5-methyl-1,2,5-oxadiazinane (**31a**)

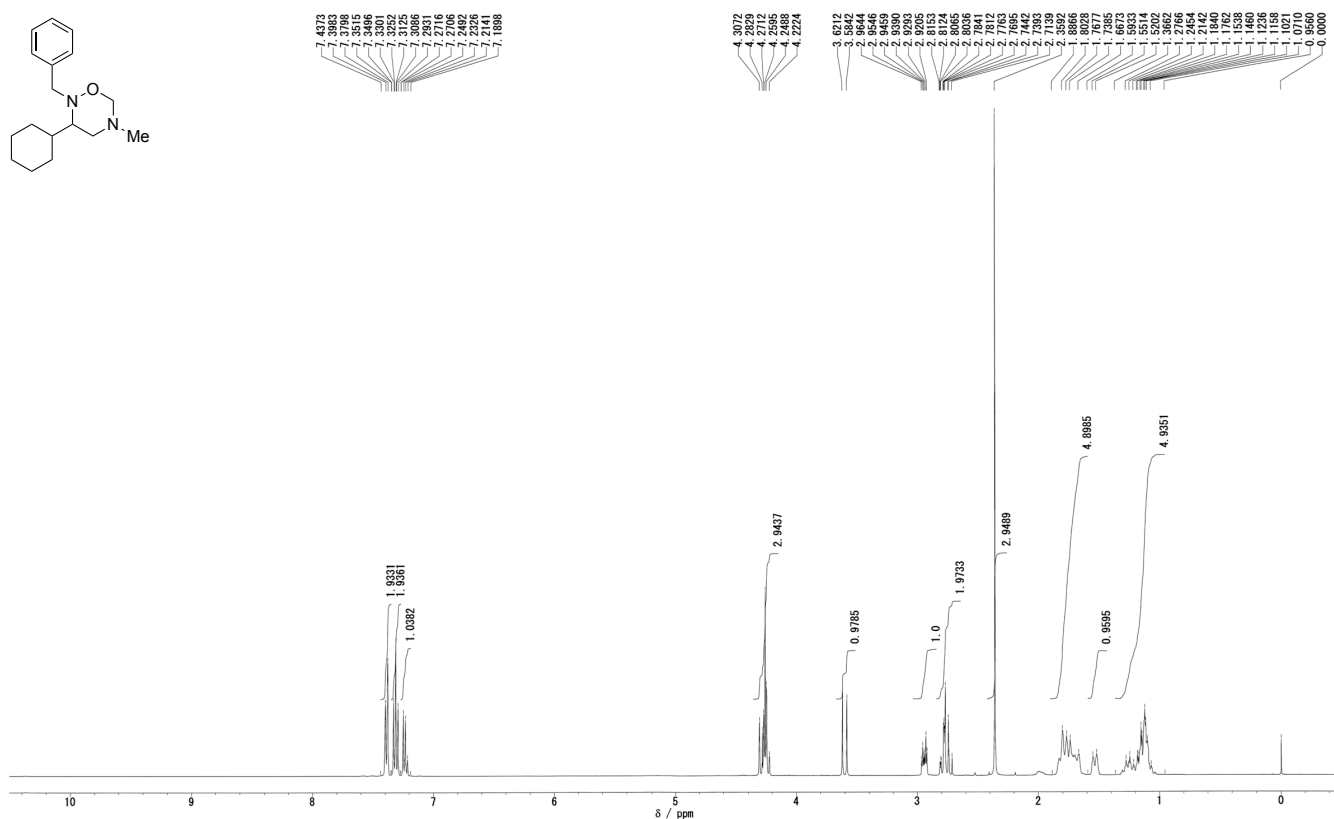

<sup>13</sup>C NMR spectrum of (±)-2-benzyl-3-cyclohexyl-5-methyl-1,2,5-oxadiazinane (**31a**)

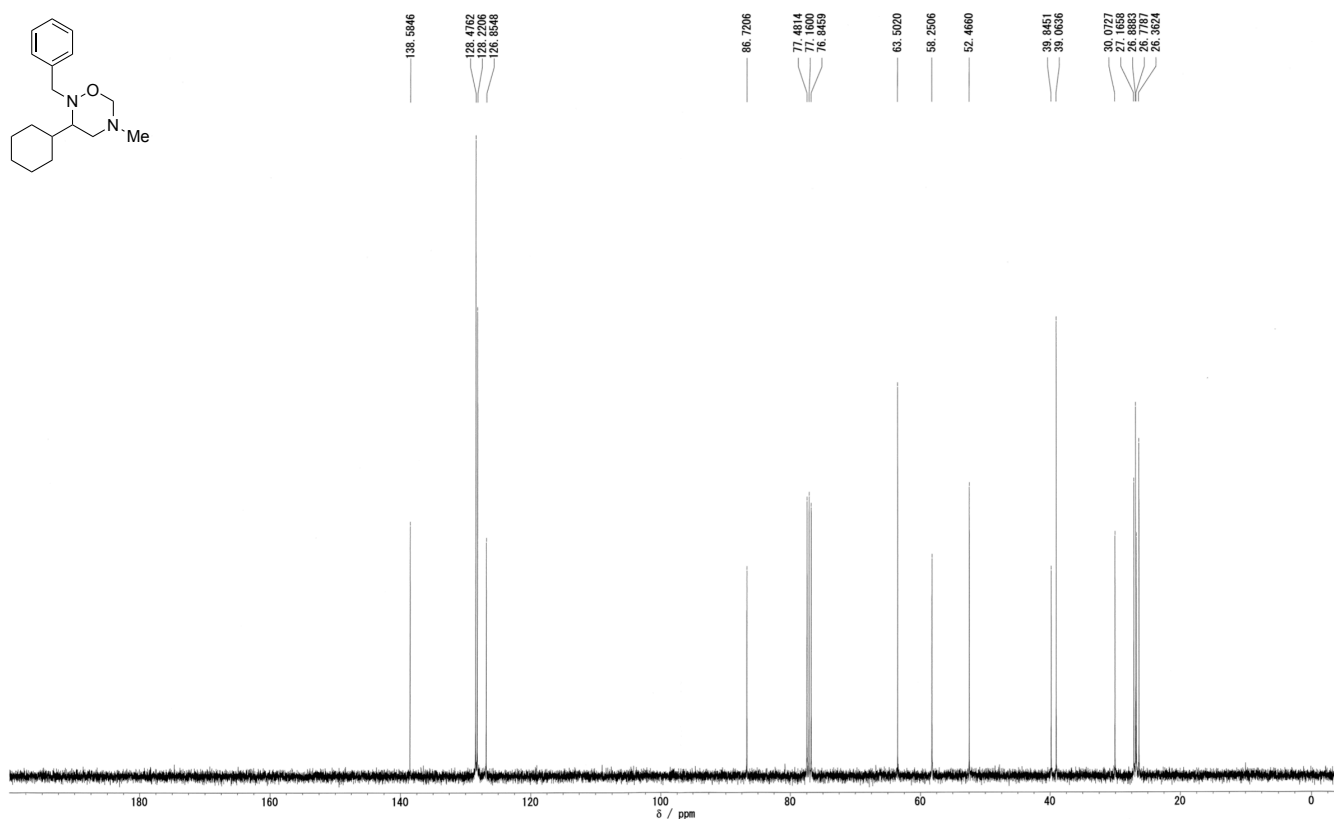

<sup>1</sup>H NMR spectrum of (±)-2-(*tert*-butyl)-5-methyl-3-phenyl-1,2,5-oxadiazinane (**3ma**)

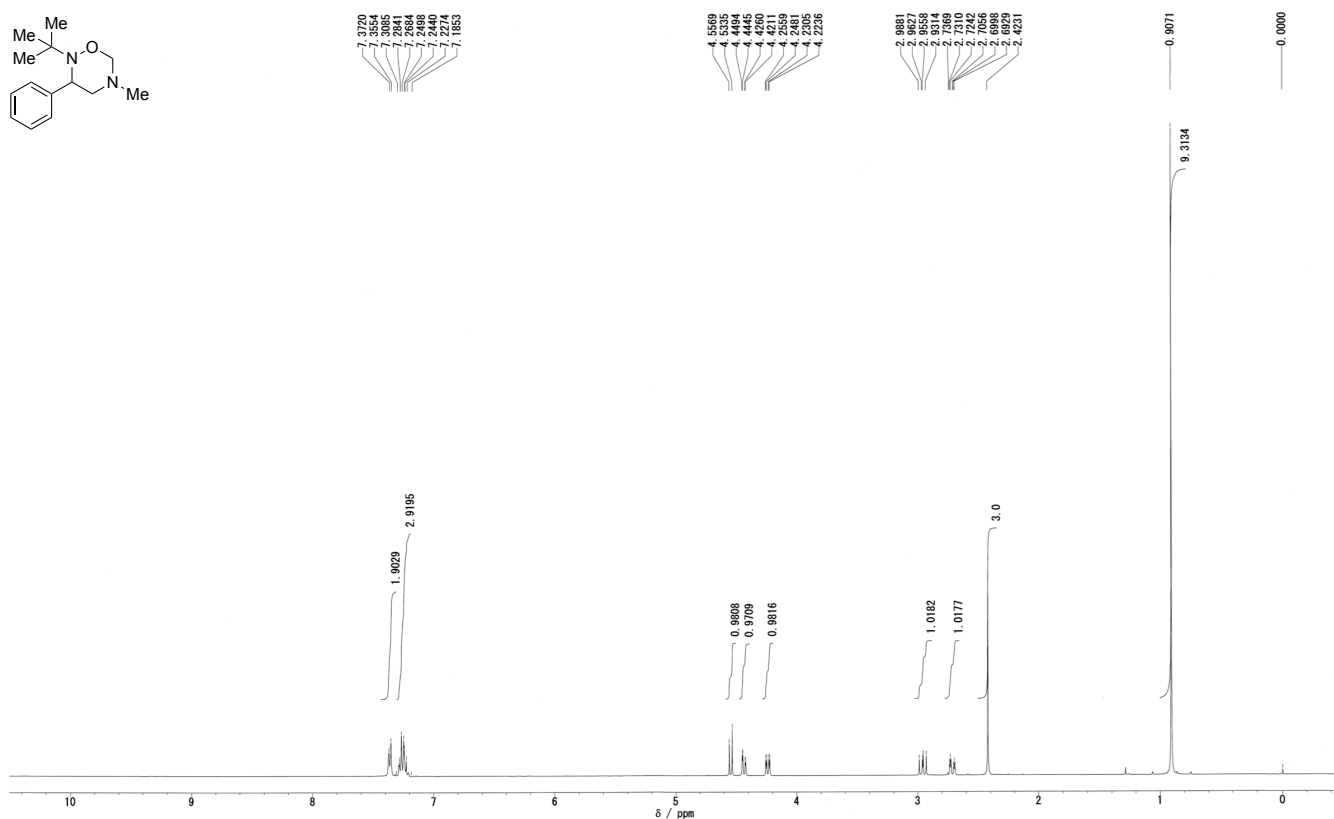

<sup>13</sup>C NMR spectrum of (±)-2-(*tert*-butyl)-5-methyl-3-phenyl-1,2,5-oxadiazinane (**3ma**)

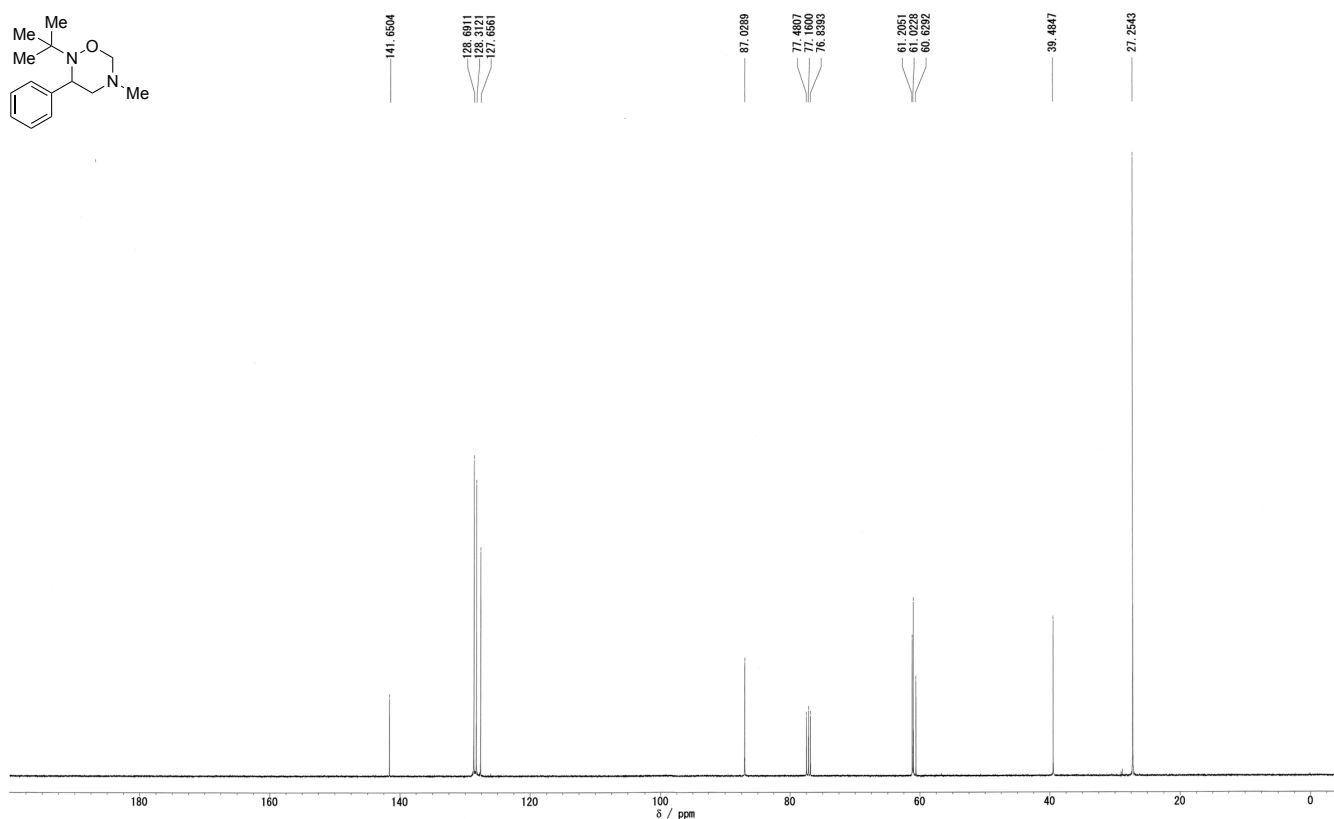

<sup>1</sup>H NMR spectrum of (±)-5-methyl-2,3-diphenyl-1,2,5-oxadiazinane (**3na**)

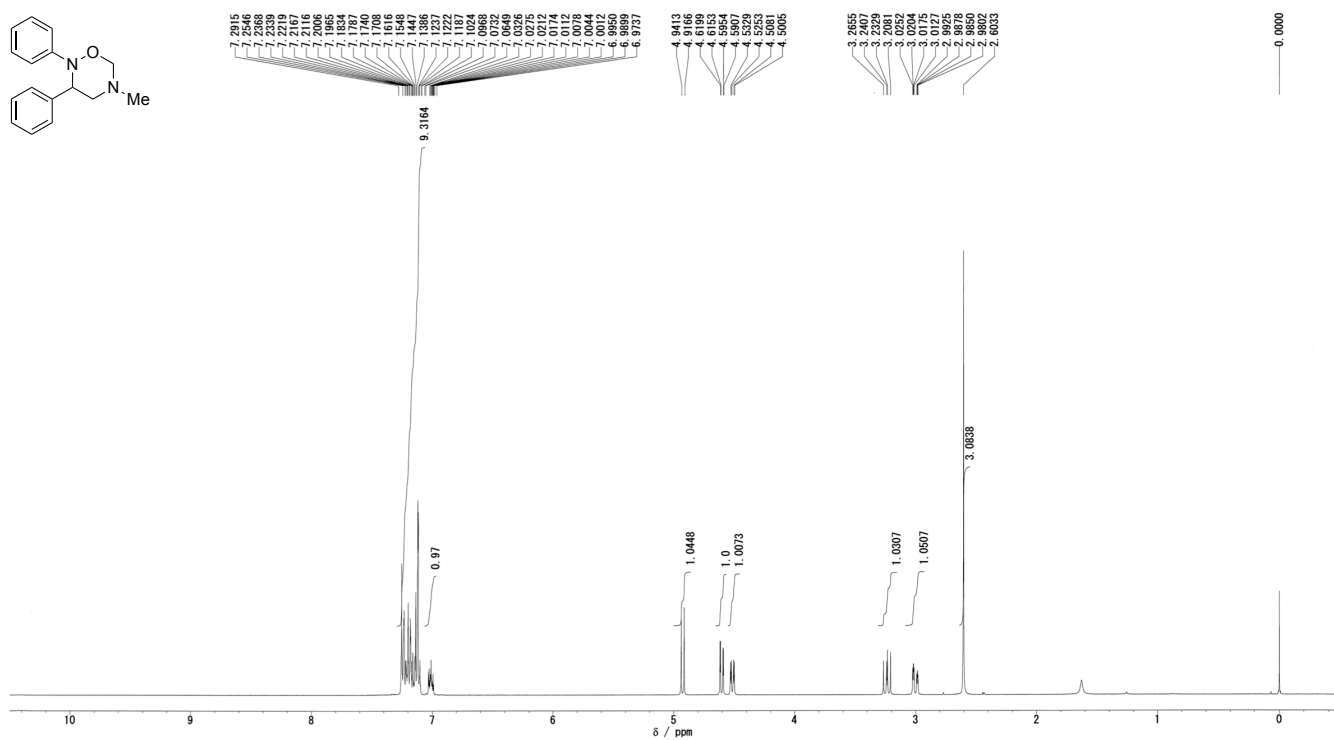

<sup>13</sup>C NMR spectrum of (±)-5-methyl-2,3-diphenyl-1,2,5-oxadiazinane (**3na**)

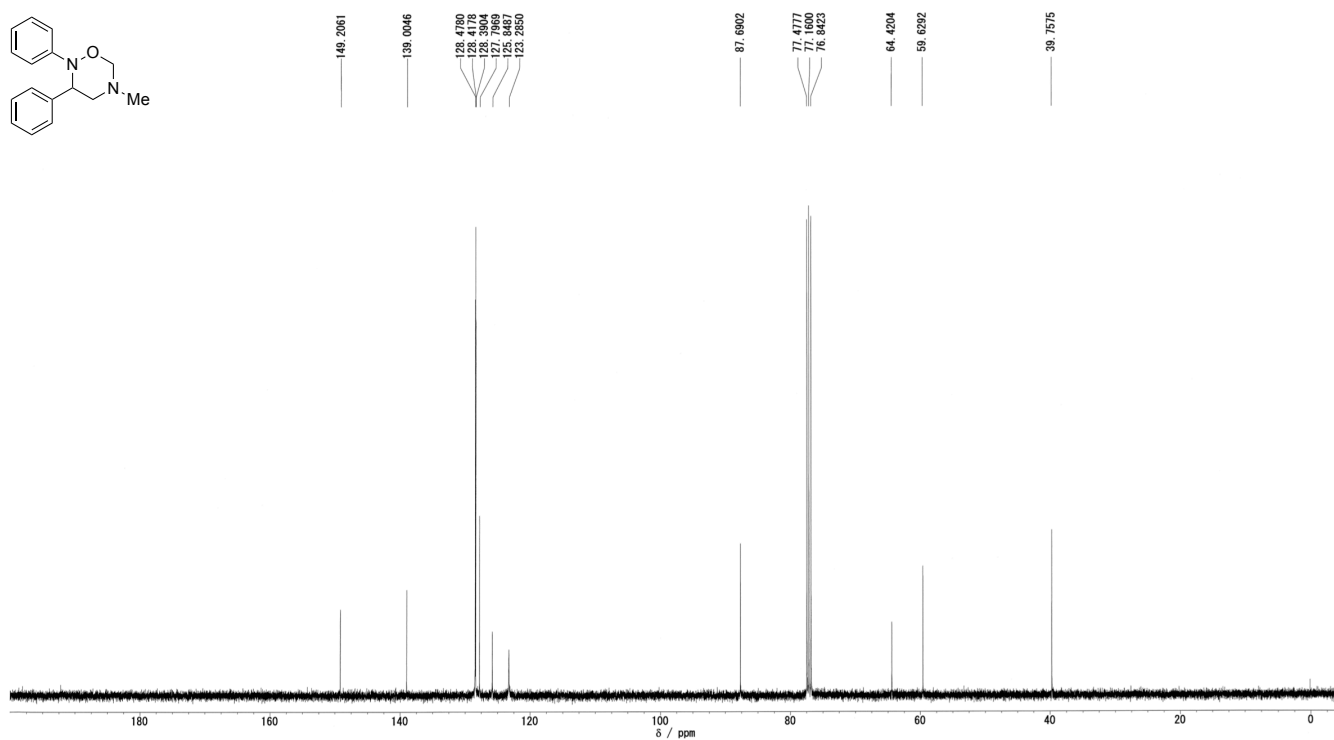



<sup>1</sup>H NMR spectrum of (±)-2-(4-fluorophenyl)-5-methyl-3-phenyl-1,2,5-oxadiazinane (**30a**)

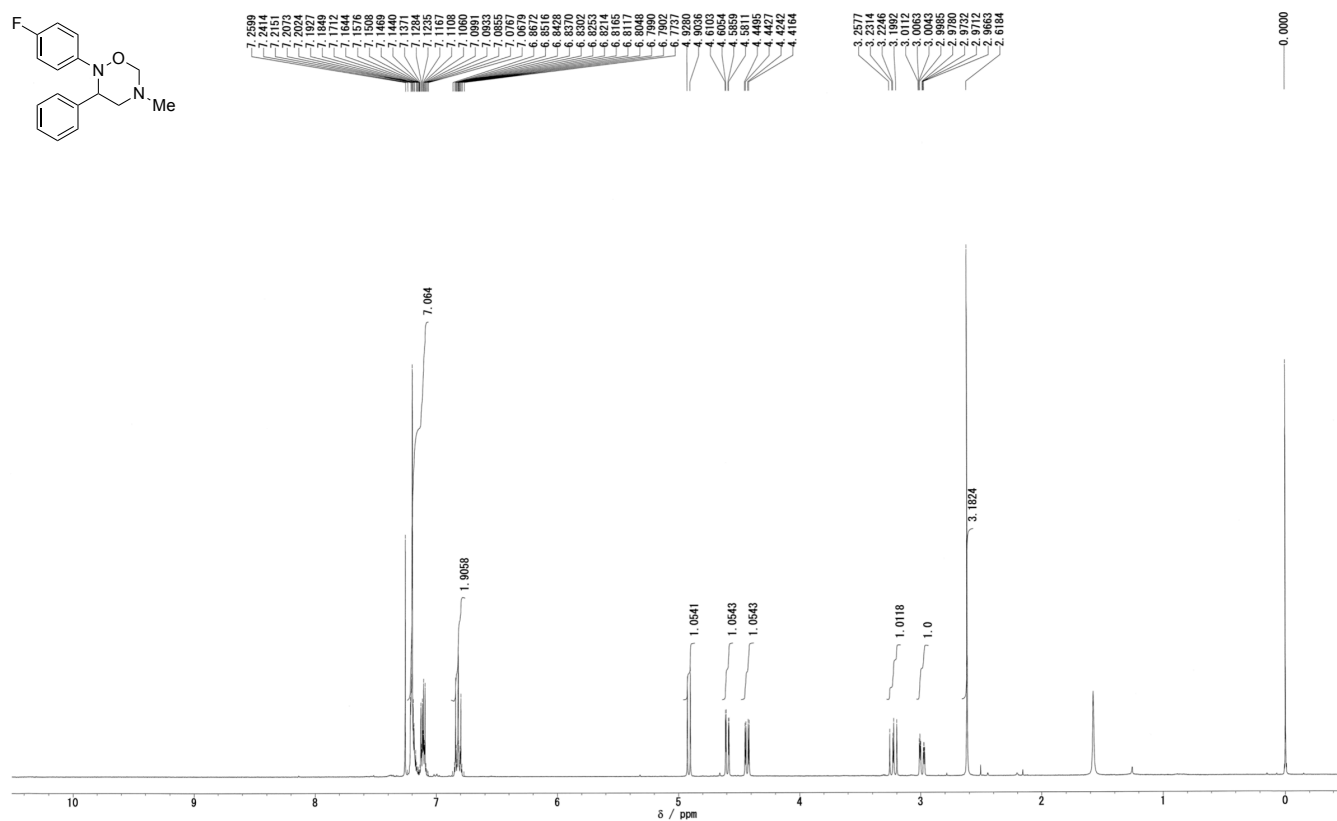

<sup>13</sup>C NMR spectrum of (±)-2-(4-fluorophenyl)-5-methyl-3-phenyl-1,2,5-oxadiazinane (**30a**)

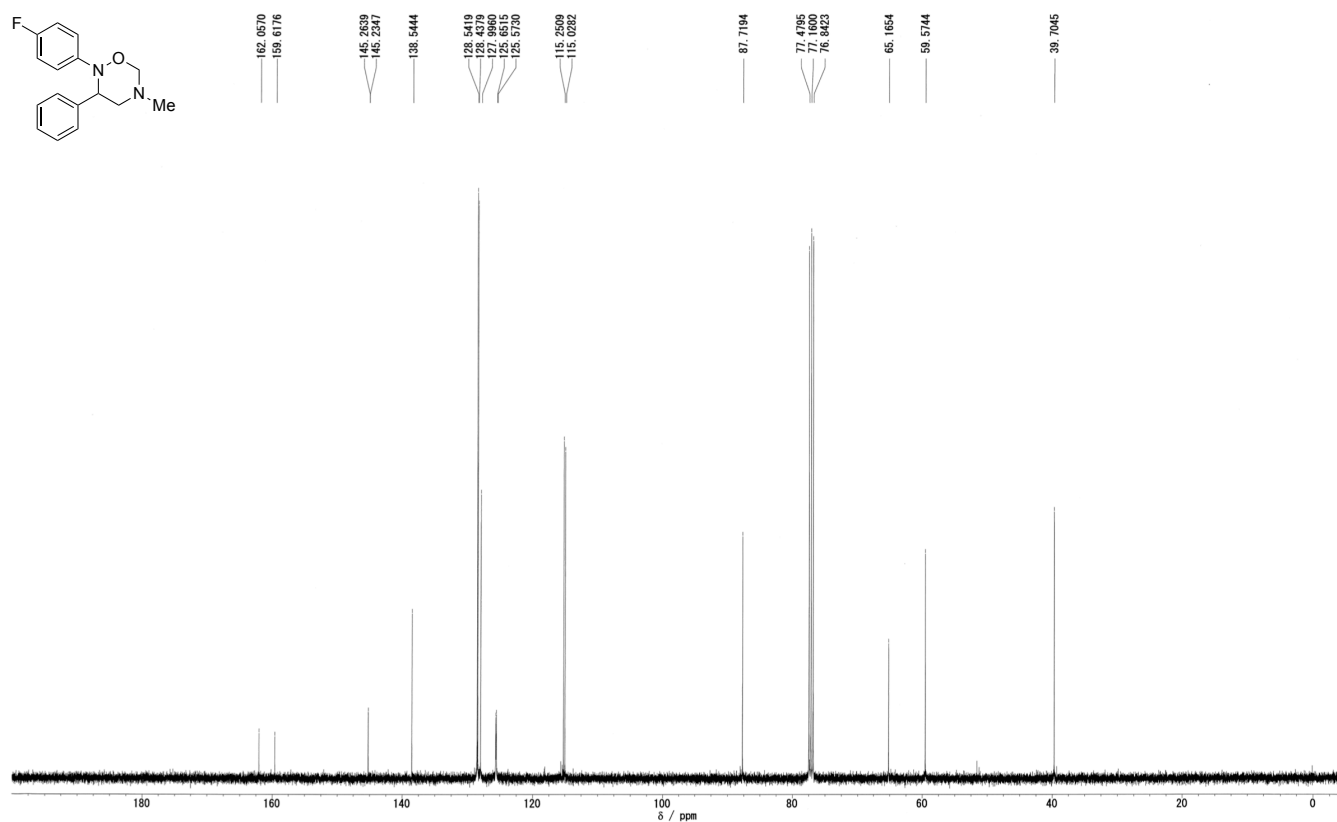

<sup>19</sup>F NMR spectrum of (±)-2-(4-fluorophenyl)-5-methyl-3-phenyl-1,2,5-oxadiazinane (**3oa**)

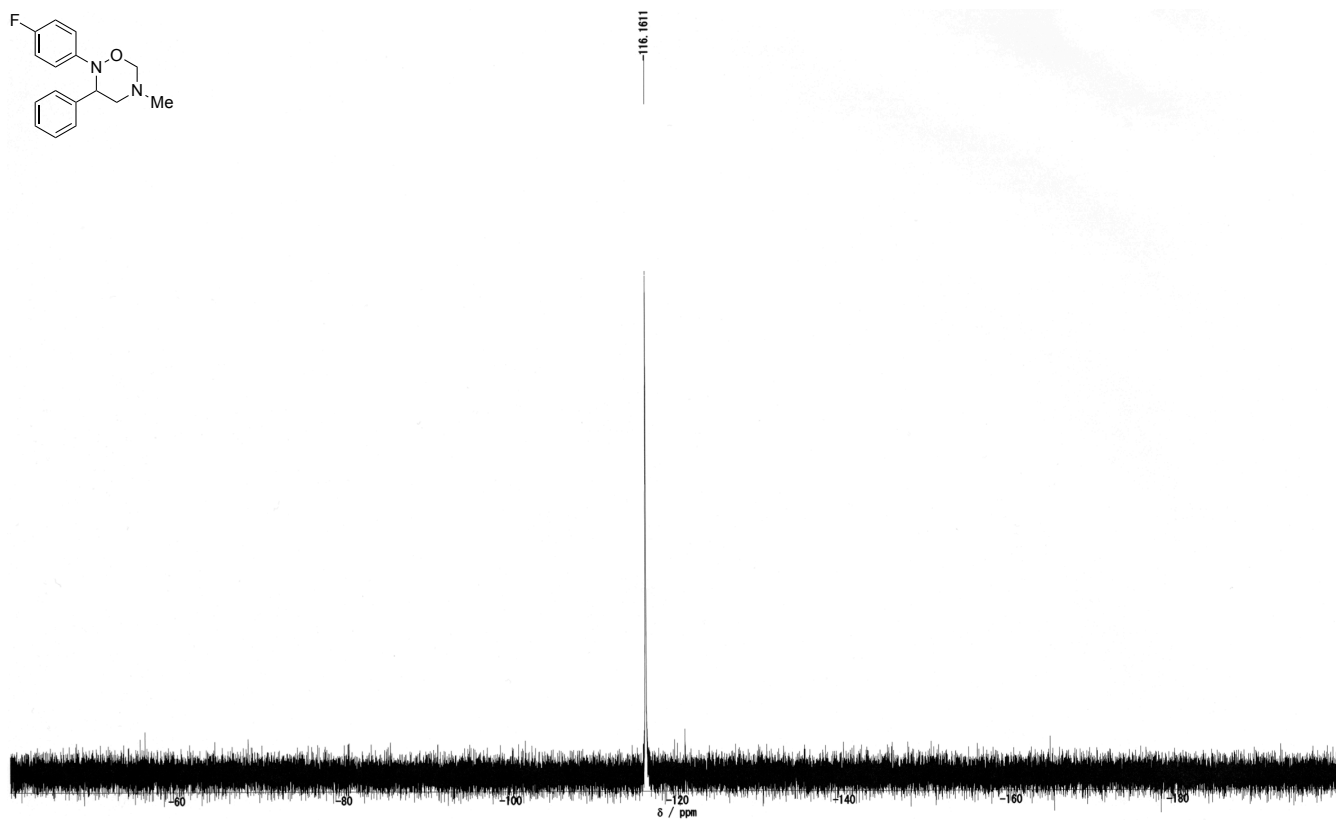

<sup>1</sup>H NMR spectrum of (±)-2-(4-chlorophenyl)-5-methyl-3-phenyl-1,2,5-oxadiazinane (**3pa**)

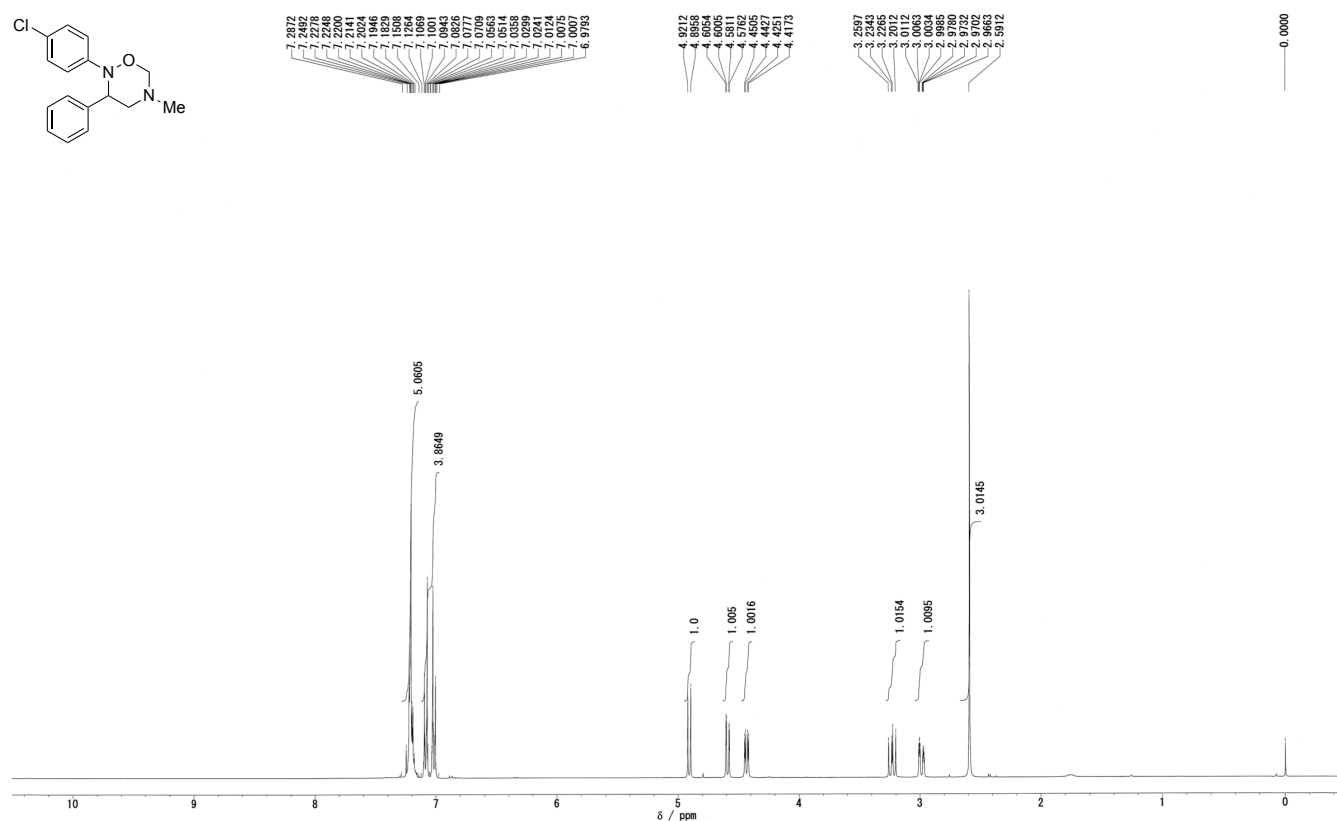

<sup>13</sup>C NMR spectrum of (±)-2-(4-chlorophenyl)-5-methyl-3-phenyl-1,2,5-oxadiazinane (**3pa**)

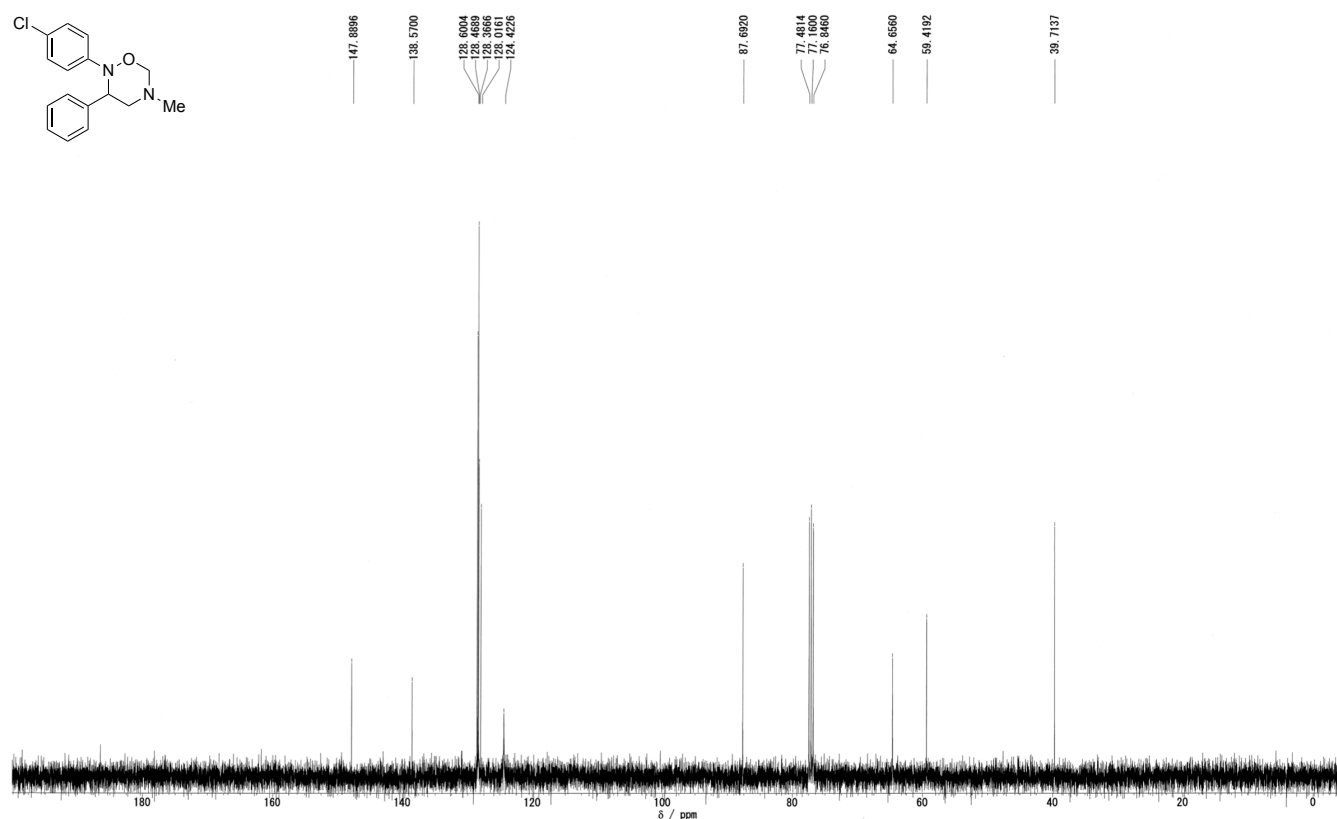

<sup>1</sup>H NMR spectrum of (±)-5-methyl-3-phenyl-2-(p-tolyl)-1,2,5-oxadiazinane (**3qa**)

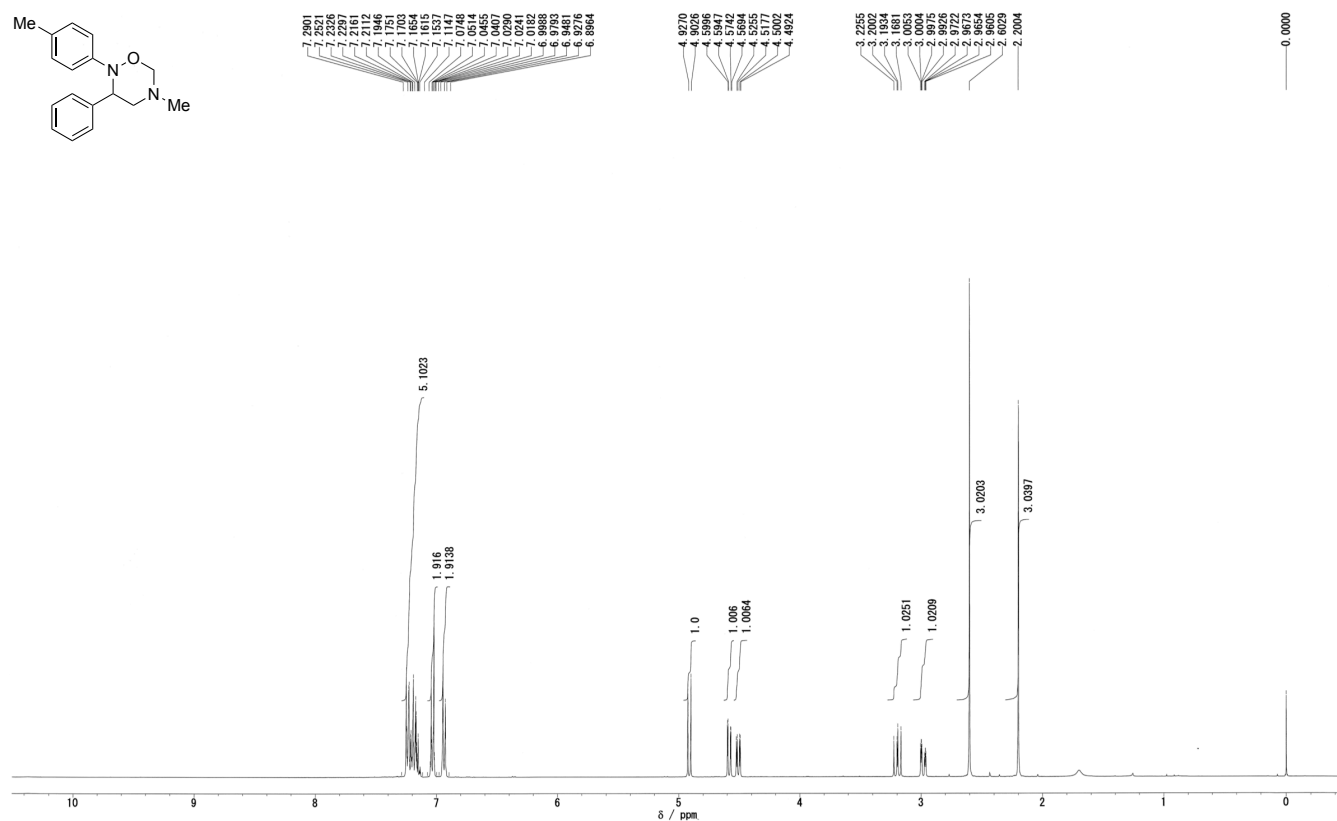

<sup>13</sup>C NMR spectrum of (±)-5-methyl-3-phenyl-2-(p-tolyl)-1,2,5-oxadiazinane (**3qa**)

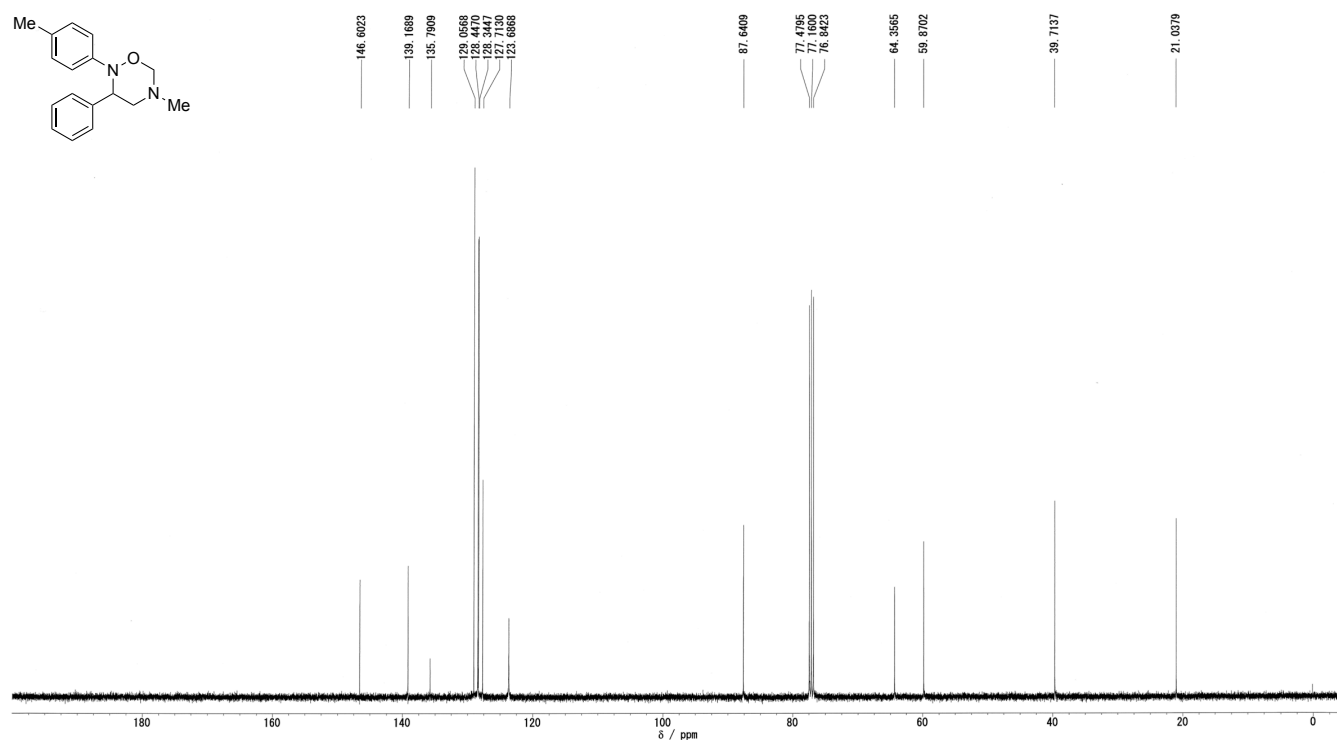

<sup>1</sup>H NMR spectrum of (±)-2-(3-methoxyphenyl)-5-methyl-3-phenyl-1,2,5-oxadiazinane (**3ra**)

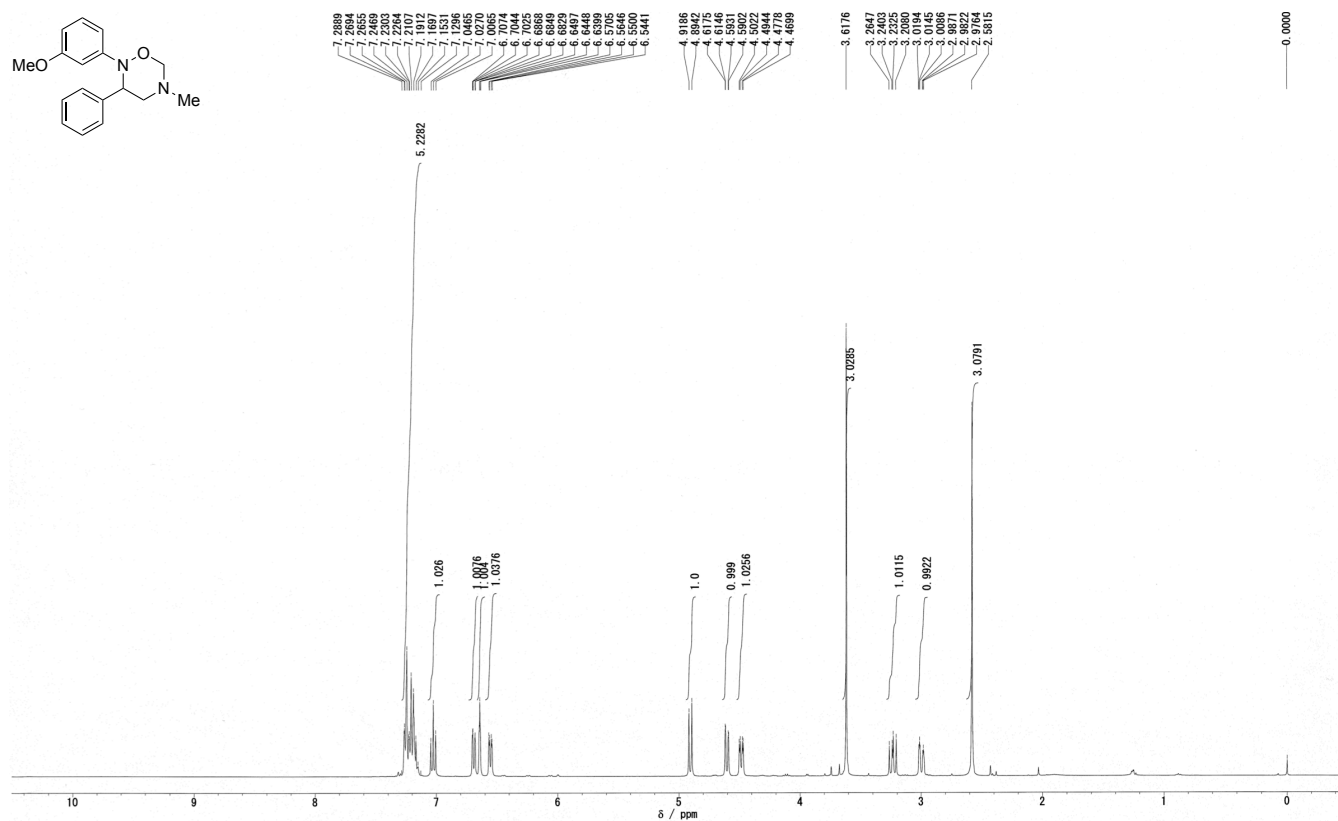

<sup>13</sup>C NMR spectrum of (±)-2-(3-methoxyphenyl)-5-methyl-3-phenyl-1,2,5-oxadiazinane (**3ra**)

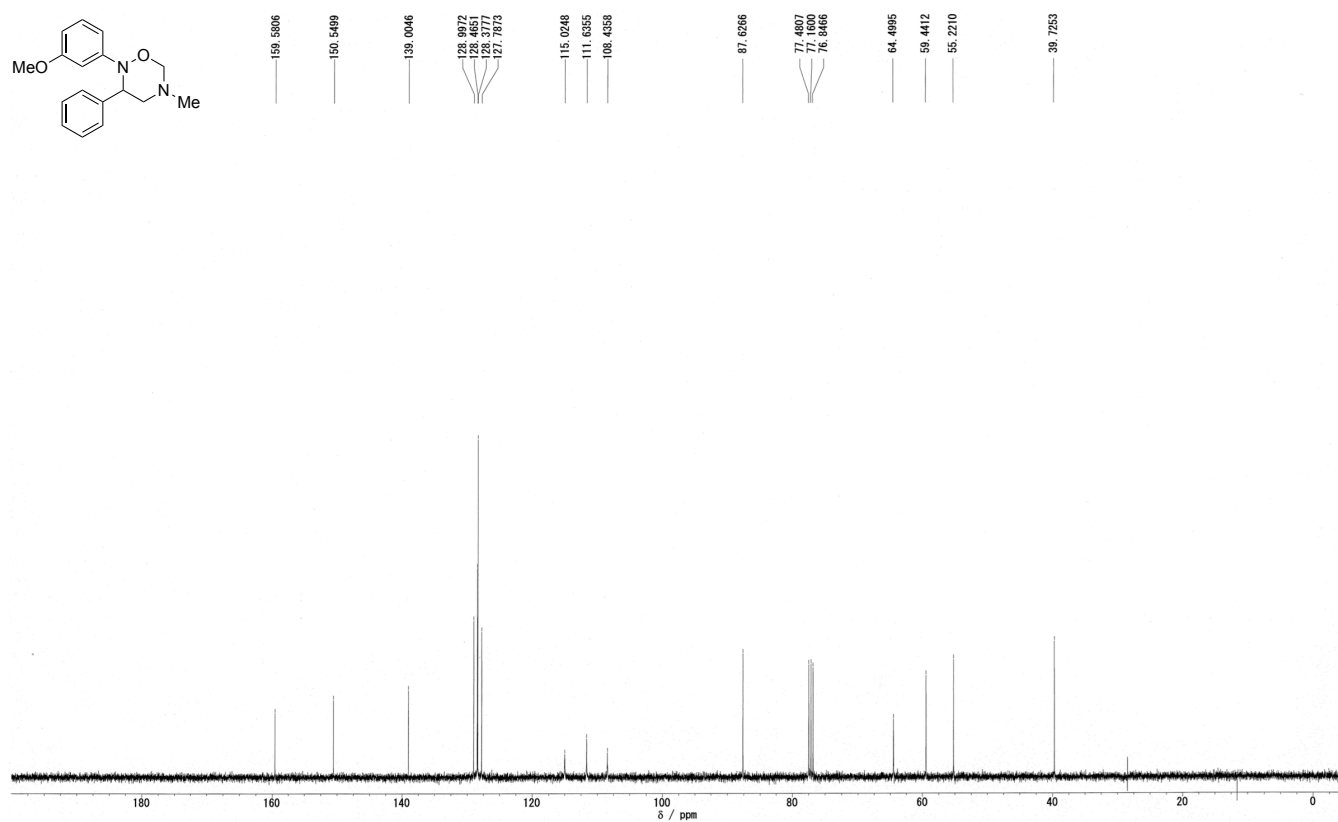

<sup>1</sup>H NMR spectrum of (±)-5-methyl-3-(naphthalen-2-yl)-2-phenyl-1,2,5-oxadiazinane (**3sa**)

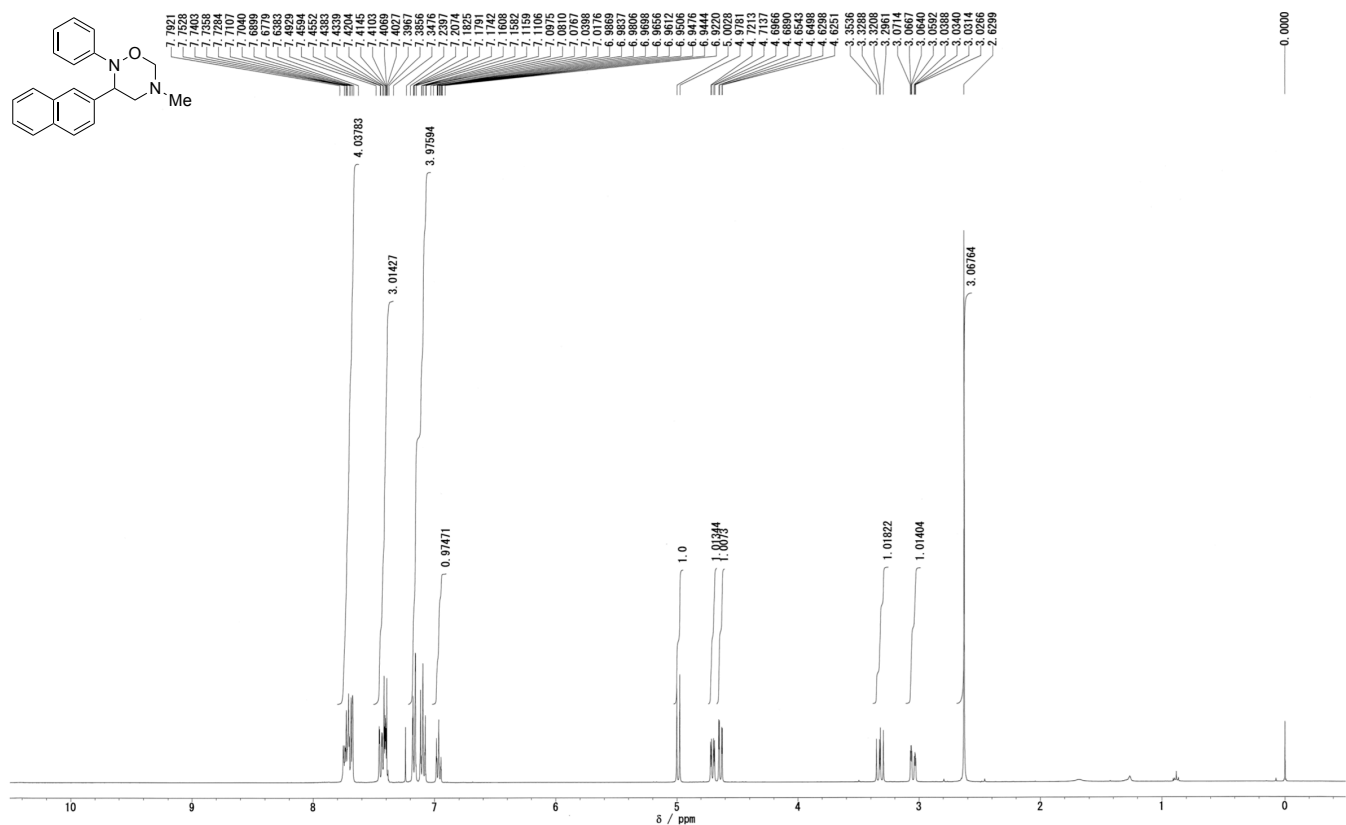<sup>13</sup>C NMR spectrum of (±)-5-methyl-3-(naphthalen-2-yl)-2-phenyl-1,2,5-oxadiazinane (**3sa**)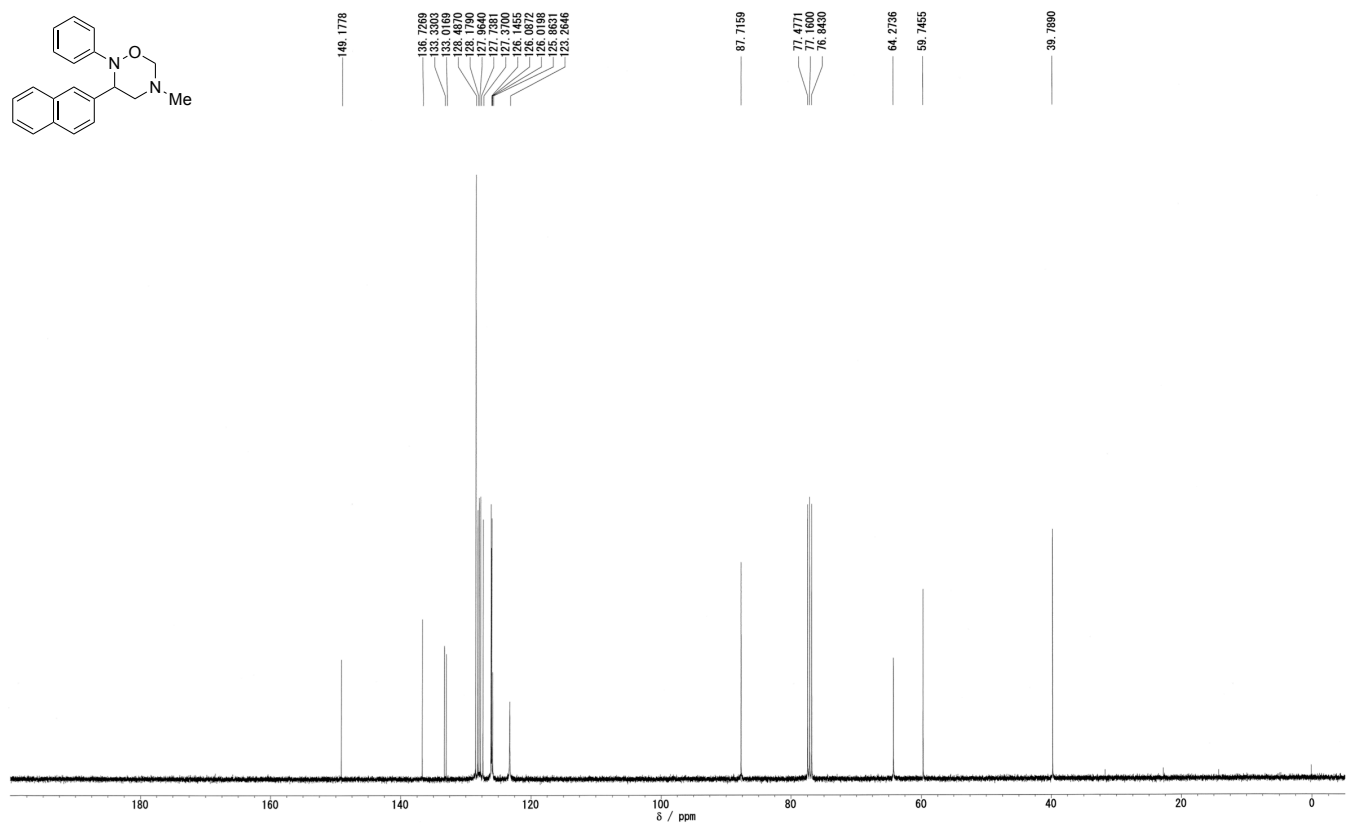

<sup>1</sup>H NMR spectrum of (±)-3-methyl-3,4,4a,9-tetrahydro-2H-dibenzo[c,f][1,2,5]oxadiazino[2,3-a]azepine (**3ua**)

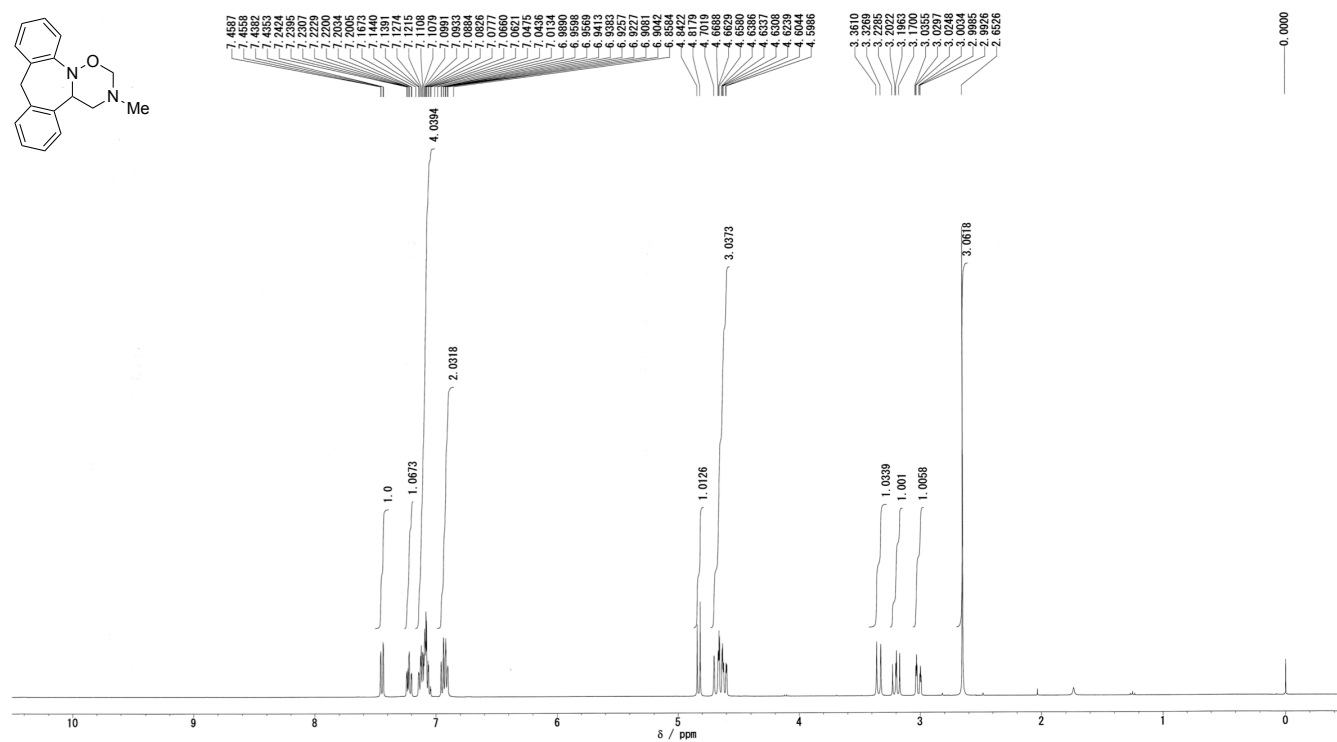

<sup>13</sup>C NMR spectrum of (±)-3-methyl-3,4,4a,9-tetrahydro-2H-dibenzo[c,f][1,2,5]oxadiazino[2,3-a]azepine (**3ua**)

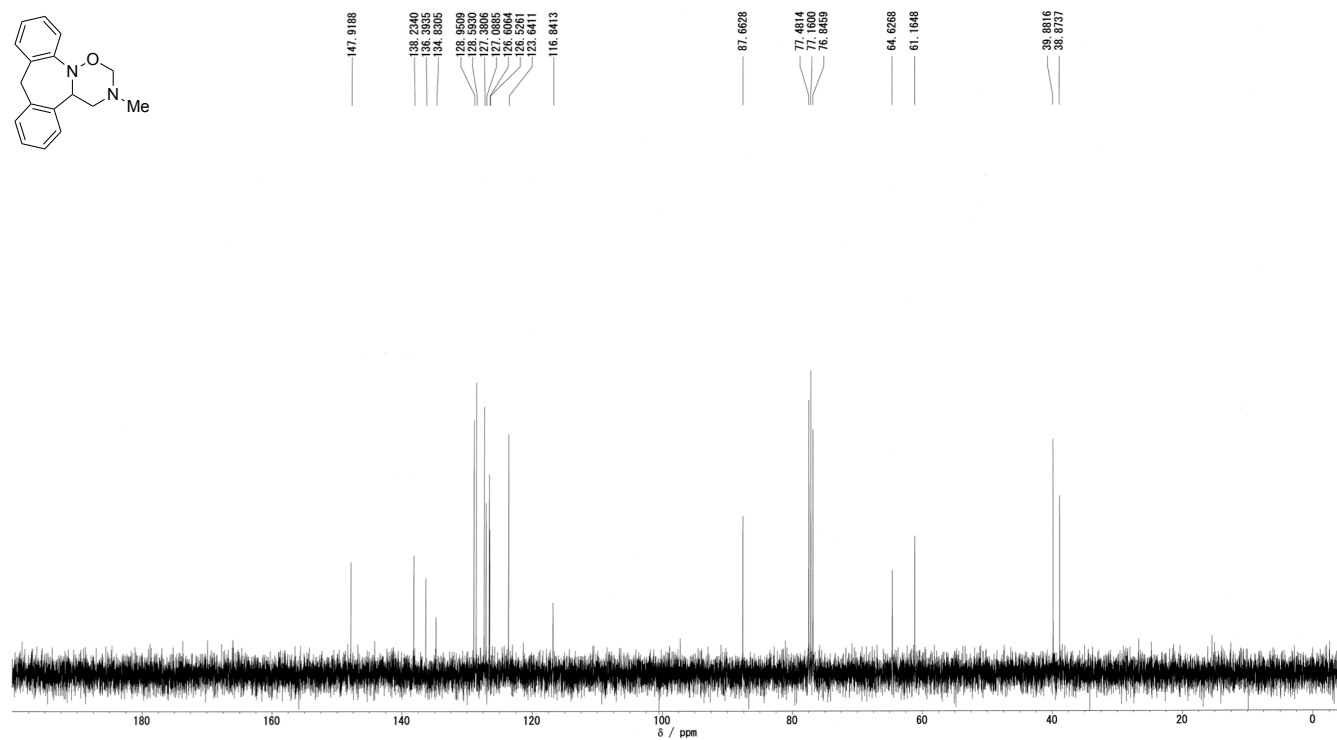

<sup>1</sup>H NMR spectrum of (±)-2,5-dibenzyl-3-phenyl-1,2,5-oxadiazinane (**3ab**)

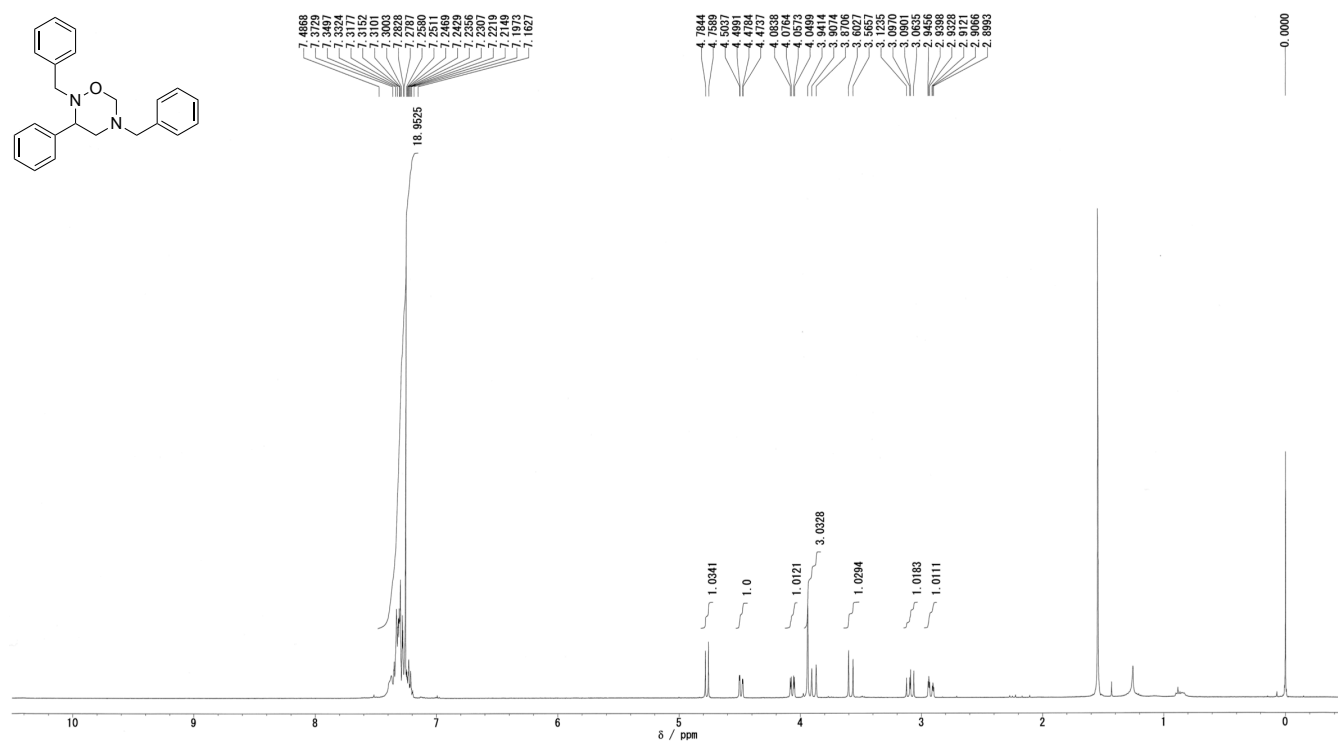

<sup>13</sup>C NMR spectrum of (±)-2,5-dibenzyl-3-phenyl-1,2,5-oxadiazinane (**3ab**)

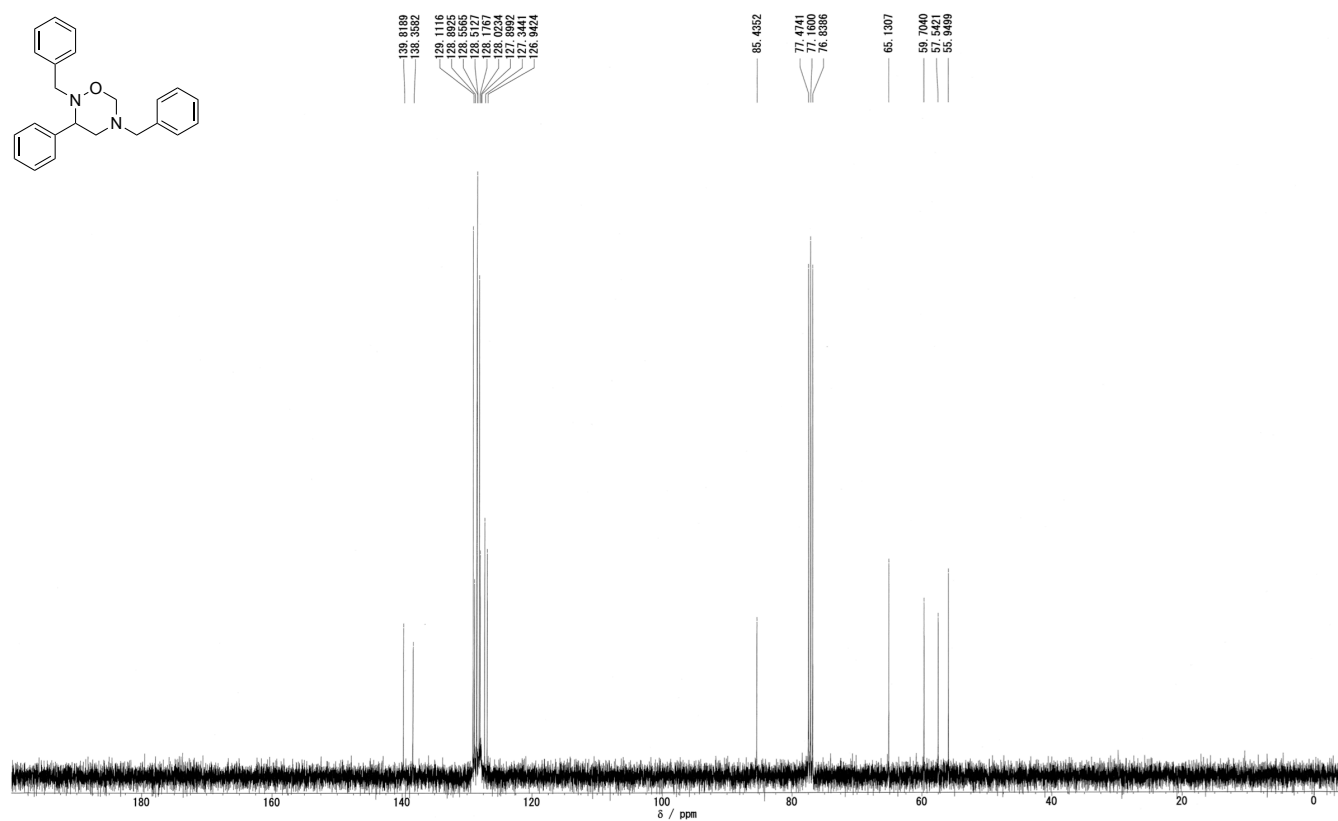



<sup>1</sup>H NMR spectrum of (±)-2-benzyl-1,2,3,6,7,11b-hexahydro-[1,2,5]oxadiazino[3,2-a]isoquinoline (**3tb**)

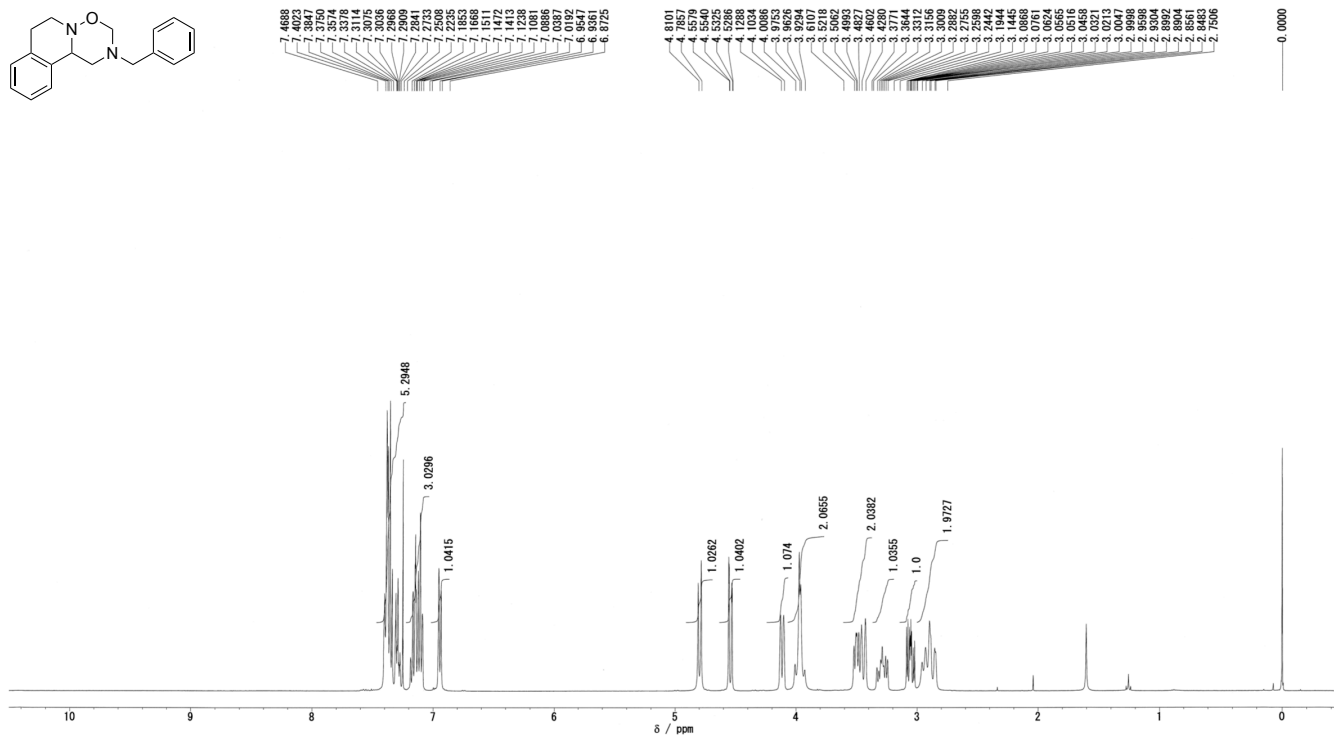

<sup>13</sup>C NMR spectrum of (±)-2-benzyl-1,2,3,6,7,11b-hexahydro-[1,2,5]oxadiazino[3,2-a]isoquinoline (**3tb**)

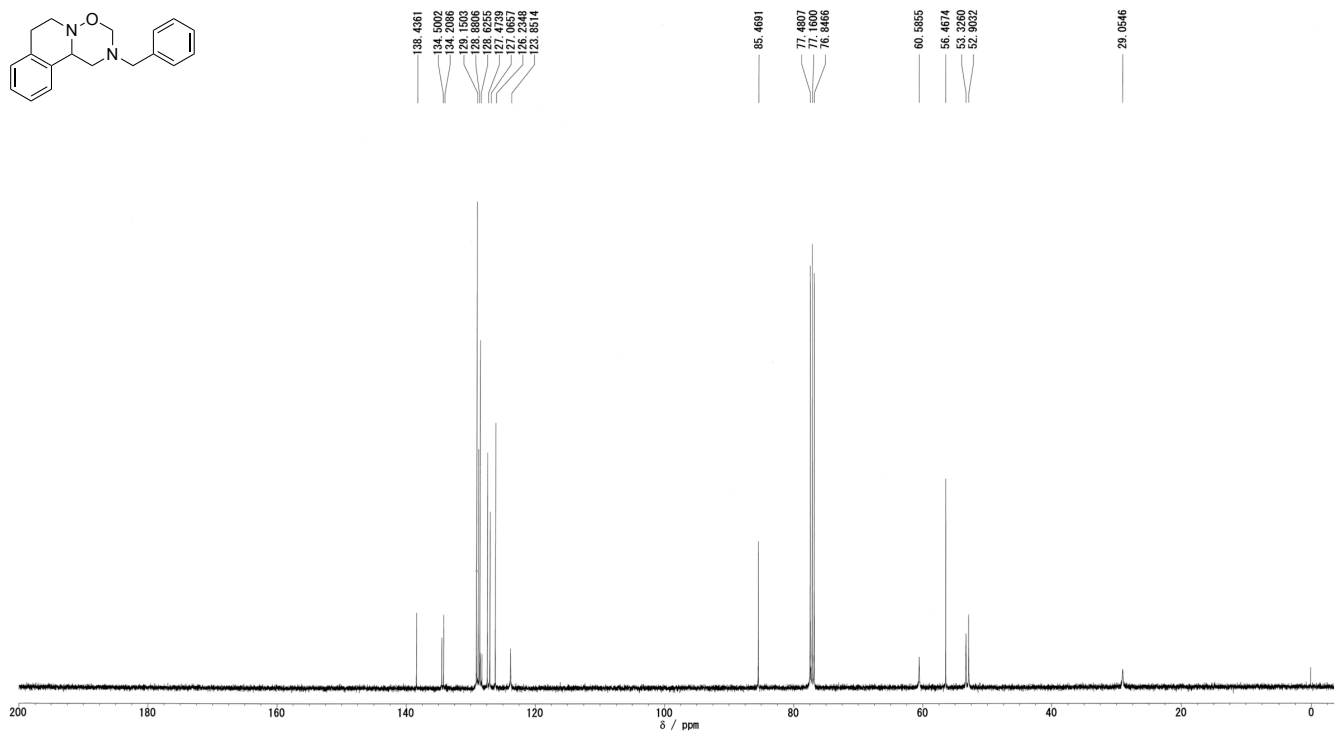

<sup>1</sup>H NMR spectrum of (±)-3-benzyl-3,4,4a,9-tetrahydro-2H-dibenzo[c,f][1,2,5]oxadiazino[2,3-a]azepine (**3ub**)

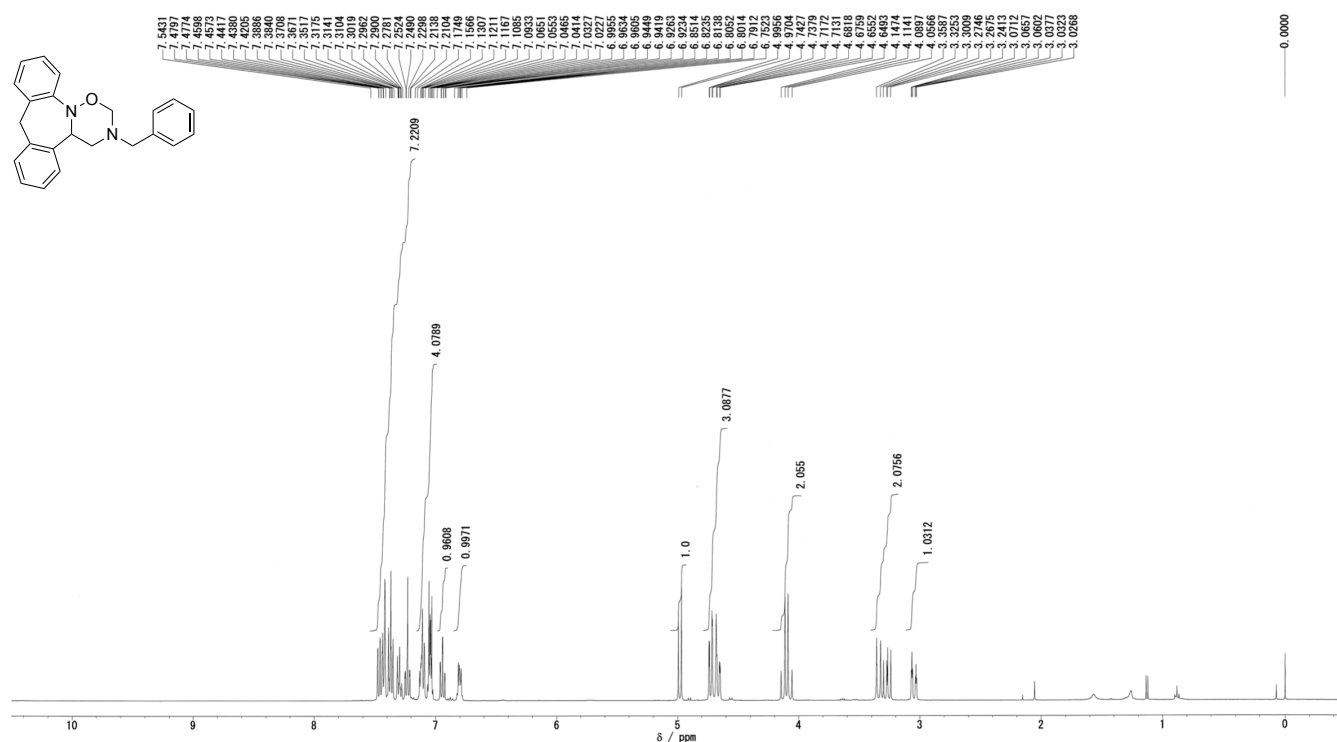

<sup>13</sup>C NMR spectrum of (±)-3-benzyl-3,4,4a,9-tetrahydro-2H-dibenzo[c,f][1,2,5]oxadiazino[2,3-a]azepine (**3ub**)

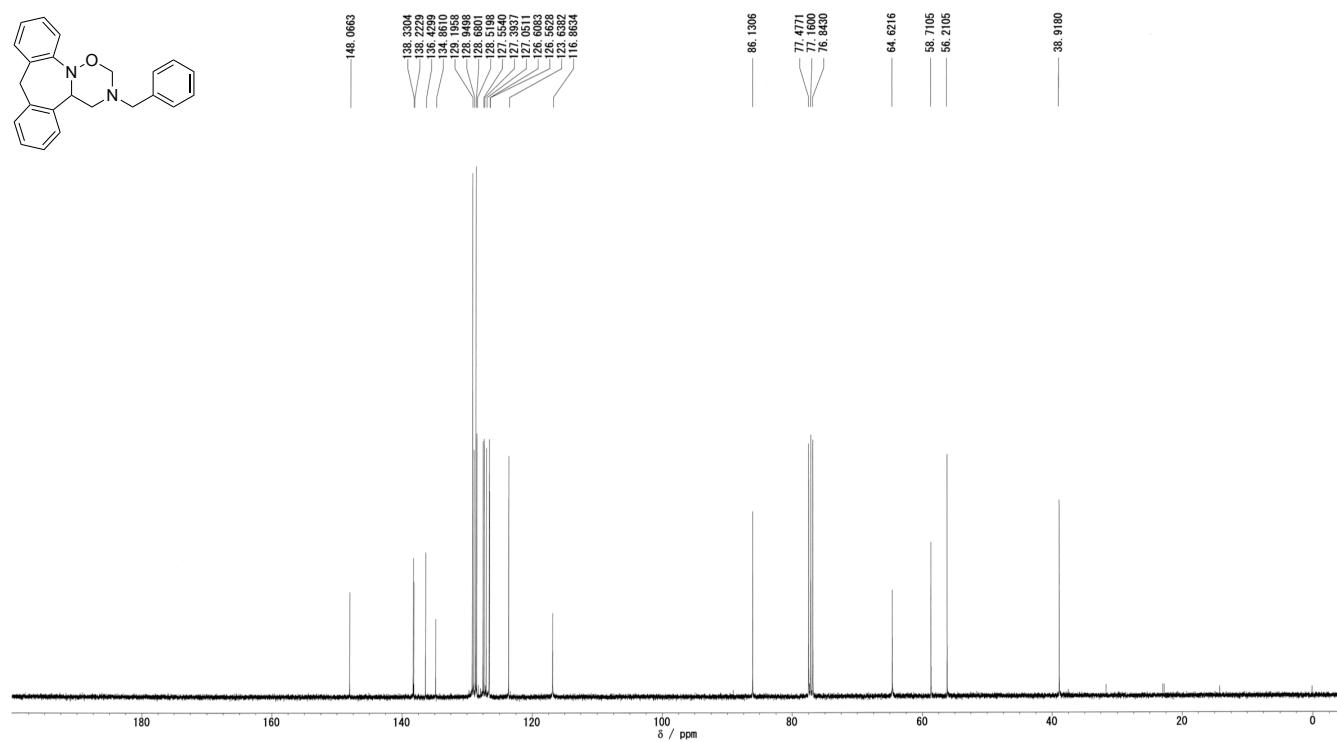

<sup>1</sup>H NMR spectrum of (±)-3-(4-methylbenzyl)-3,4,4a,9-tetrahydro-2H-dibenzo[c,f][1,2,5]oxadiazino[2,3-a]azepine (**3uc**)

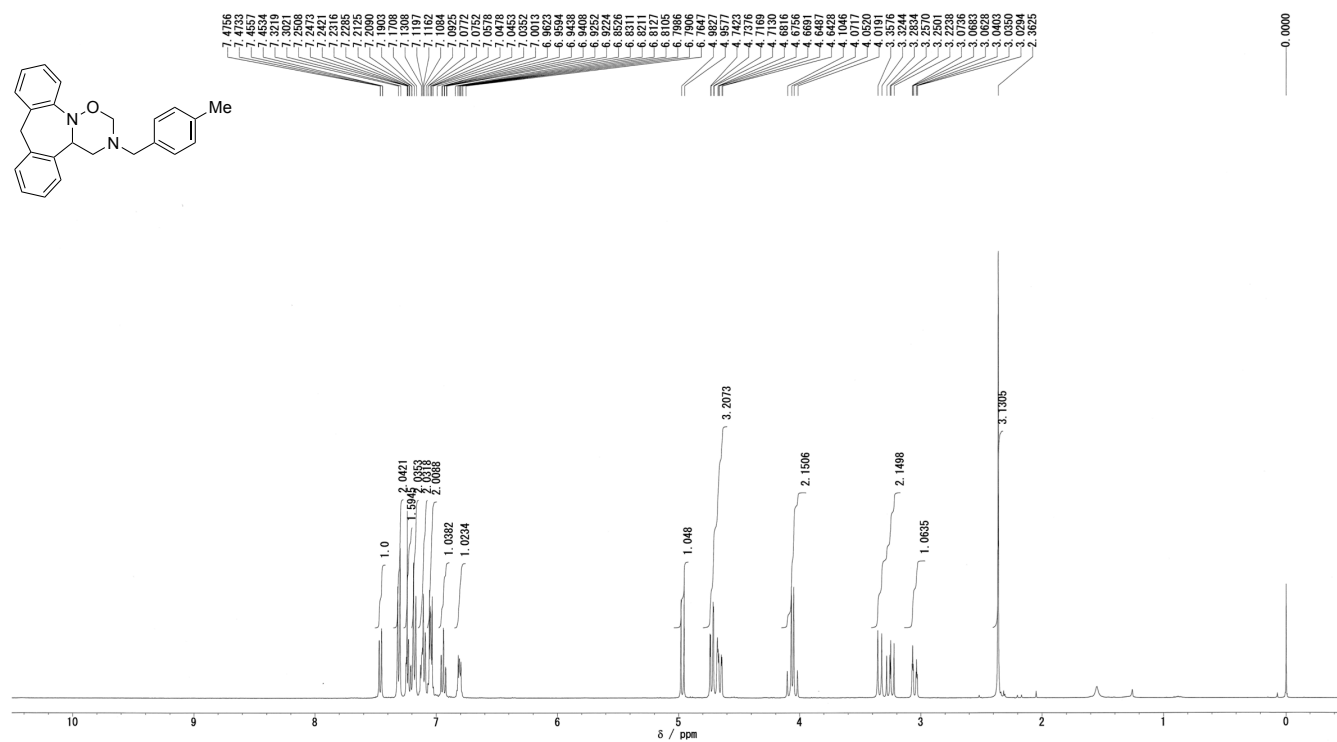

<sup>13</sup>C NMR spectrum of (±)-3-(4-methylbenzyl)-3,4,4a,9-tetrahydro-2H-dibenzo[c,f][1,2,5]oxadiazino[2,3-a]azepine (**3uc**)

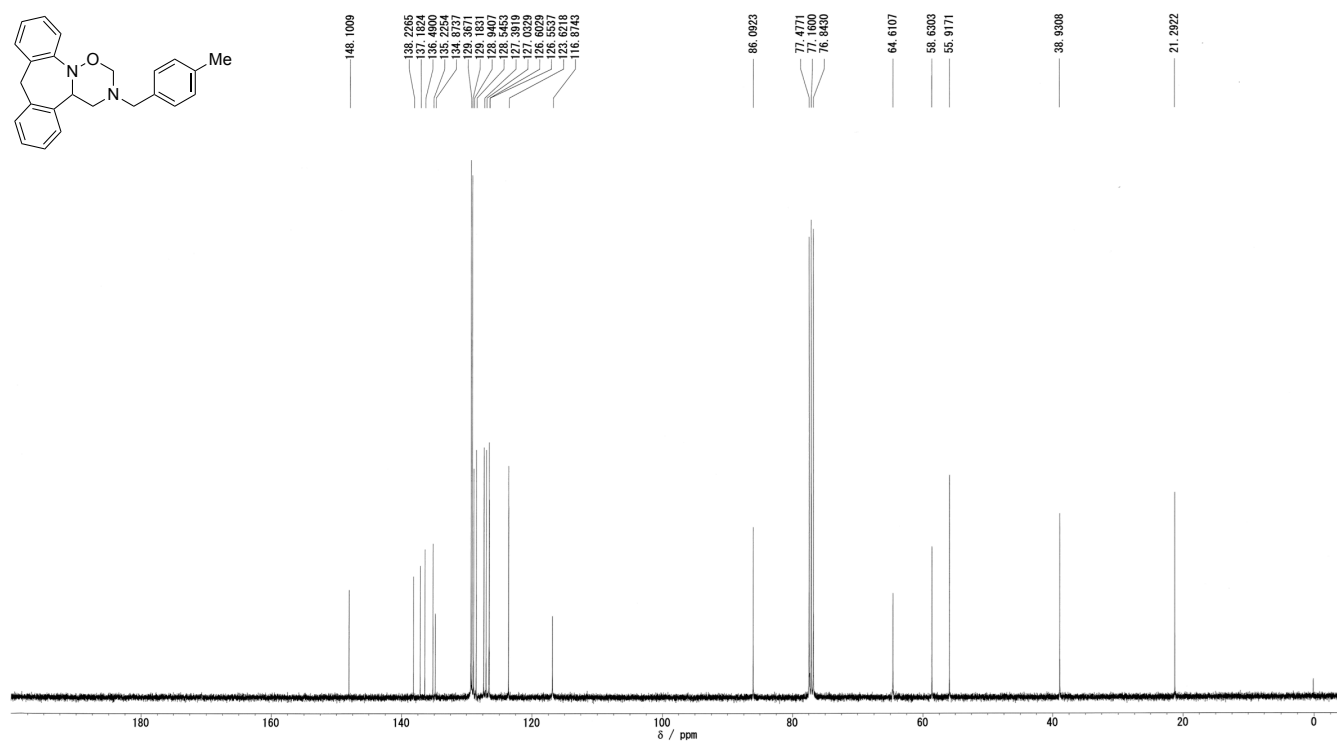


COc1ccc(cc1)CN2CCOc3c2ccc4ccccc34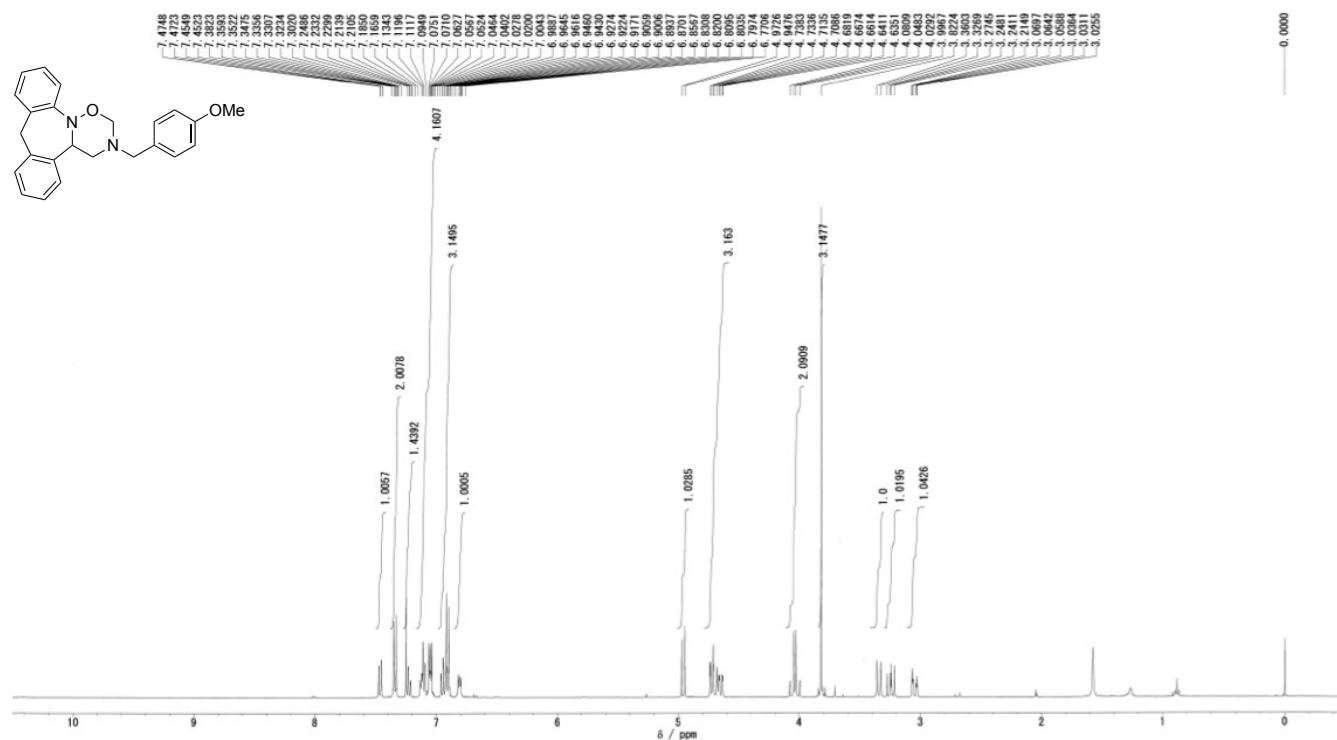COc1ccc(cc1)CN2CC3C4C5C6C7C8C9C10C11C12C13C14C15C16C17C18C19C20C21C22C23C24C25C26C27C28C29C30C31C32C33C34C35C36C37C38C39C40C41C42C43C44C45C46C47C48C49C50C51C52C53C54C55C56C57C58C59C60C61C62C63C64C65C66C67C68C69C70C71C72C73C74C75C76C77C78C79C80C81C82C83C84C85C86C87C88C89C90C91C92C93C94C95C96C97C98C99C100C101C102C103C104C105C106C107C108C109C110C111C112C113C114C115C116C117C118C119C120C121C122C123C124C125C126C127C128C129C130C131C132C133C134C135C136C137C138C139C140C141C142C143C144C145C146C147C148C149C150C151C152C153C154C155C156C157C158C159C160C161C162C163C164C165C166C167C168C169C170C171C172C173C174C175C176C177C178C179C180C181C182C183C184C185C186C187C188C189C190C191C192C193C194C195C196C197C198C199C200C201C202C203C204C205C206C207C208C209C210C211C212C213C214C215C216C217C218C219C220C221C222C223C224C225C226C227C228C229C230C231C232C233C234C235C236C237C238C239C240C241C242C243C244C245C246C247C248C249C250C251C252C253C254C255C256C257C258C259C260C261C262C263C264C265C266C267C268C269C270C271C272C273C274C275C276C277C278C279C280C281C282C283C284C285C286C287C288C289C290C291C292C293C294C295C296C297C298C299C300C301C302C303C304C305C306C307C308C309C310C311C312C313C314C315C316C317C318C319C320C321C322C323C324C325C326C327C328C329C330C331C332C333C334C335C336C337C338C339C340C341C342C343C344C345C346C347C348C349C350C351C352C353C354C355C356C357C358C359C360C361C362C363C364C365C366C367C368C369C370C371C372C373C374C375C376C377C378C379C380C381C382C383C384C385C386C387C388C389C390C391C392C393C394C395C396C397C398C399C400C401C402C403C404C405C406C407C408C409C410C411C412C413C414C415C416C417C418C419C420C421C422C423C424C425C426C427C428C429C430C431C432C433C434C435C436C437C438C439C440C441C442C443C444C445C446C447C448C449C450C451C452C453C454C455C456C457C458C459C460C461C462C463C464C465C466C467C468C469C470C471C472C473C474C475C476C477C478C479C480C481C482C483C484C485C486C487C488C489C490C491C492C493C494C495C496C497C498C499C500C501C502C503C504C505C506C507C508C509C510C511C512C513C514C515C516C517C518C519C520C521C522C523C524C525C526C527C528C529C530C531C532C533C534C535C536C537C538C539C540C541C542C543C544C545C546C547C548C549C550C551C552C553C554C555C556C557C558C559C560C561C562C563C564C565C566C567C568C569C570C571C572C573C574C575C576C577C578C579C580C581C582C583C584C585C586C587C588C589C590C591C592C593C594C595C596C597C598C599C600C601C602C603C604C605C606C607C608C609C610C611C612C613C614C615C616C617C618C619C620C621C622C623C624C625C626C627C628C629C630C631C632C633C634C635C636C637C638C639C640C641C642C643C644C645C646C647C648C649C650C651C652C653C654C655C656C657C658C659C660C661C662C663C664C665C666C667C668C669C670C671C672C673C674C675C676C677C678C679C680C681C682C683C684C685C686C687C688C689C690C691C692C693C694C695C696C697C698C699C700C701C702C703C704C705C706C707C708C709C710C711C712C713C714C715C716C717C718C719C720C721C722C723C724C725C726C727C728C729C730C731C732C733C734C735C736C737C738C739C740C741C742C743C744C745C746C747C748C749C750C751C752C753C754C755C756C757C758C759C760C761C762C763C764C765C766C767C768C769C770C771C772C773C774C775C776C777C778C779C780C781C782C783C784C785C786C787C788C789C790C791C792C793C794C795C796C797C798C799C800C801C802C803C804C805C806C807C808C809C810C811C812C813C814C815C816C817C818C819C820C821C822C823C824C825C826C827C828C829C830C831C832C833C834C835C836C837C838C839C840C841C842C843C844C845C846C847C848C849C850C851C852C853C854C855C856C857C858C859C860C861C862C863C864C865C866C867C868C869C870C871C872C873C874C875C876C877C878C879C880C881C882C883C884C885C886C887C888C889C890C891C892C893C894C895C896C897C898C899C900C901C902C903C904C905C906C907C908C909C910C911C912C913C914C915C916C917C918C919C920C921C922C923C924C925C926C927C928C929C930C931C932C933C934C935C936C937C938C939C940C941C942C943C944C945C946C947C948C949C950C951C952C953C954C955C956C957C958C959C960C961C962C963C964C965C966C967C968C969C970C971C972C973C974C975C976C977C978C979C980C981C982C983C984C985C986C987C988C989C990C991C992C993C994C995C996C997C998C999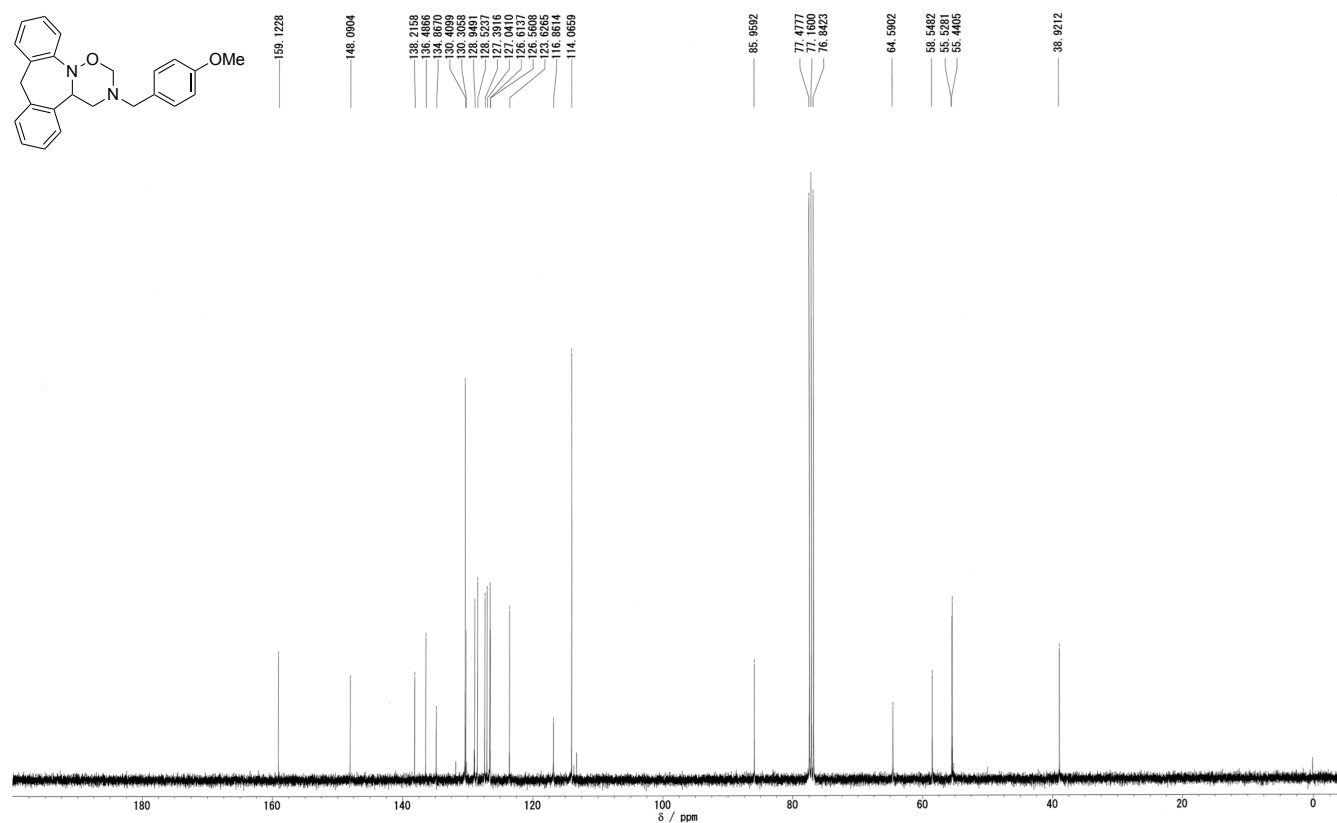

<sup>1</sup>H NMR spectrum of (±)-1,2,3,3a,3b,8-hexahydro-15*H*-dibenzo[*c,f*]pyrrolo[2',1':4,5][1,2,5]oxadiazino[2,3-*a*]azepine (**3ue**)

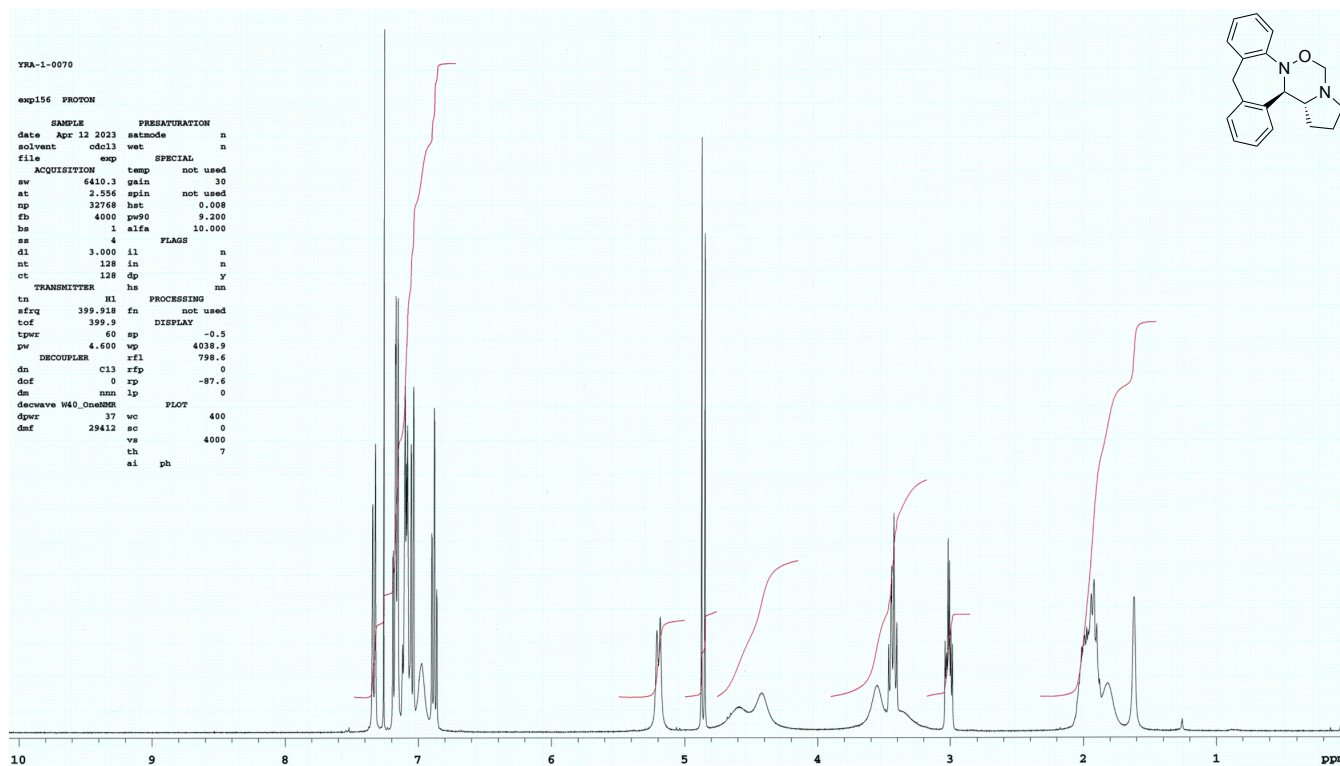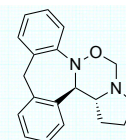

<sup>13</sup>C NMR spectrum of (±)-1,2,3,3a,3b,8-hexahydro-15*H*-dibenzo[*c,f*]pyrrolo[2',1':4,5][1,2,5]oxadiazino[2,3-*a*]azepine (**3ue**)

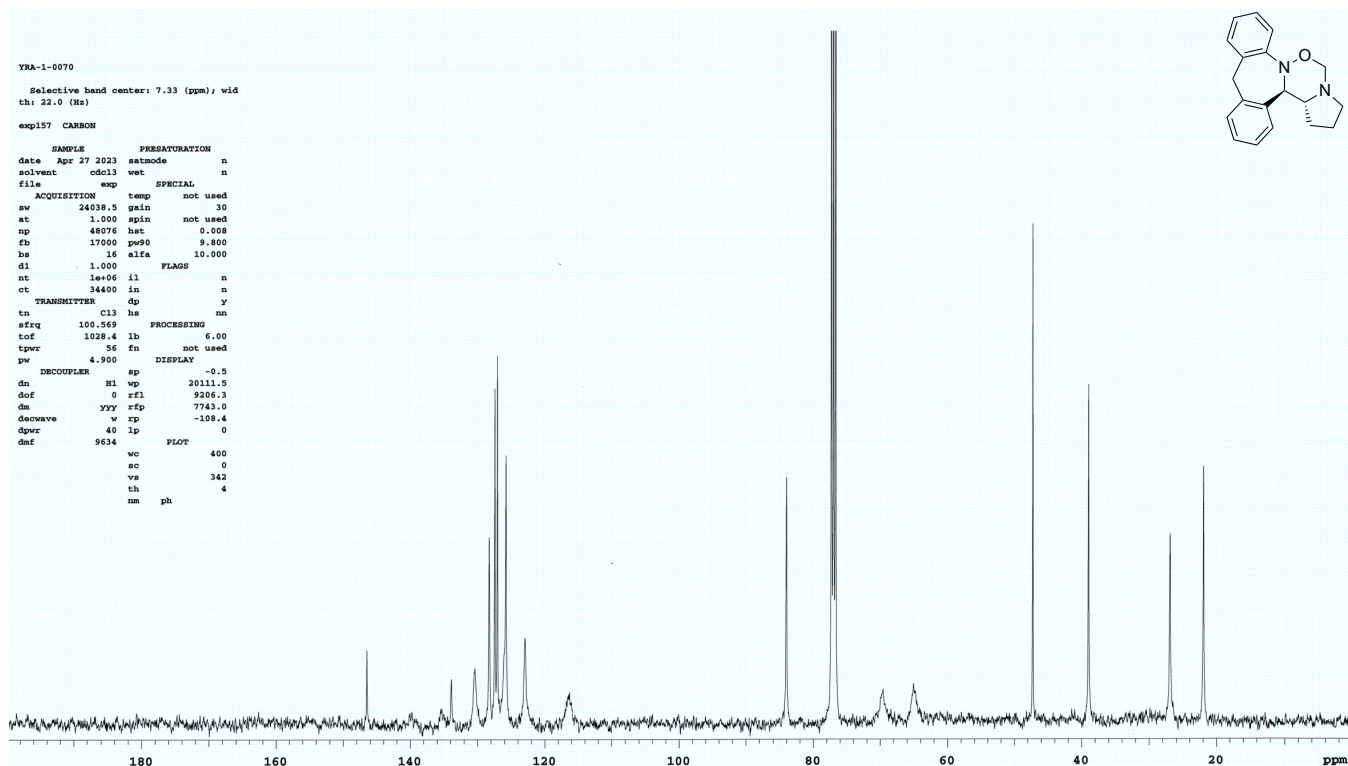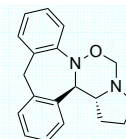



$^1\text{H}$ - $^1\text{H}$  ROESY spectrum of ( $\pm$ )-1,2,3,3a,3b,8-hexahydro-15*H*-dibenzo[*c,f*]pyrrolo[2',1':4,5][1,2,5]oxadiazino[2,3-*a*]azepine (**3ue**)

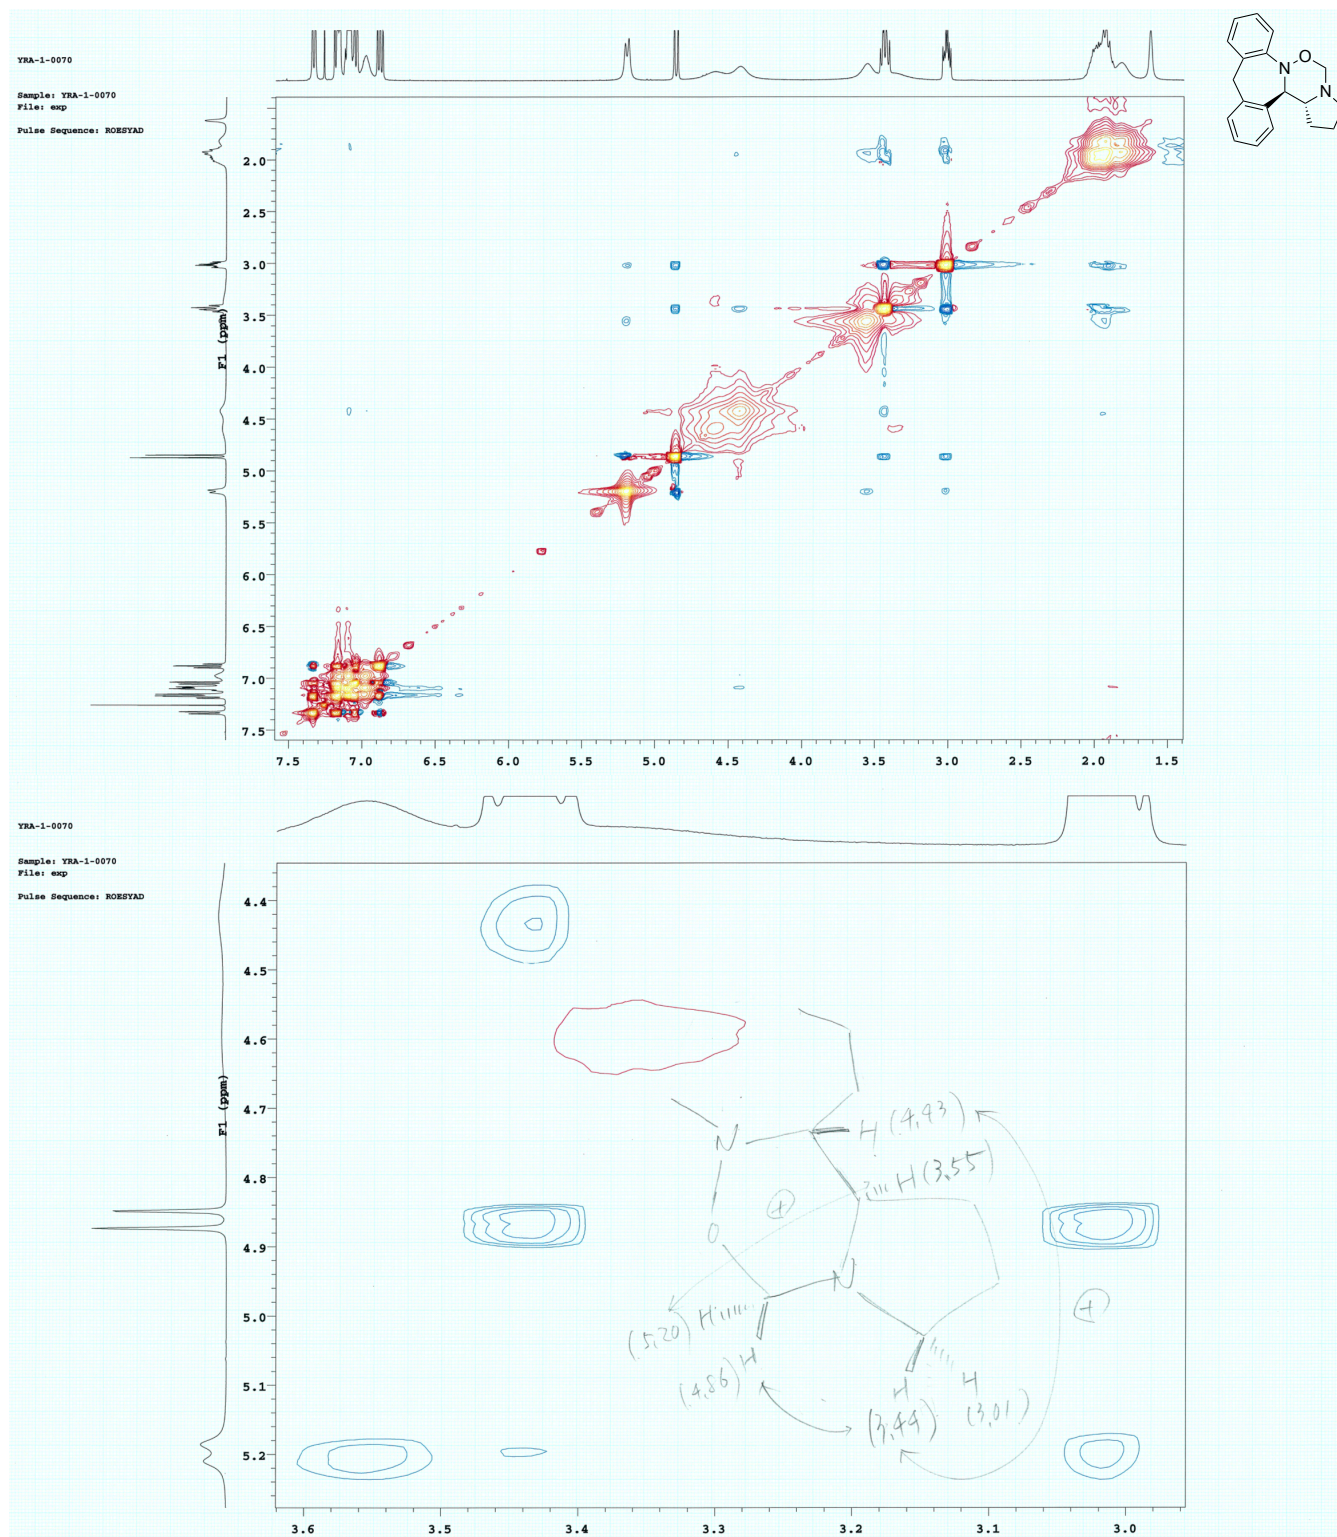

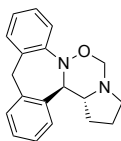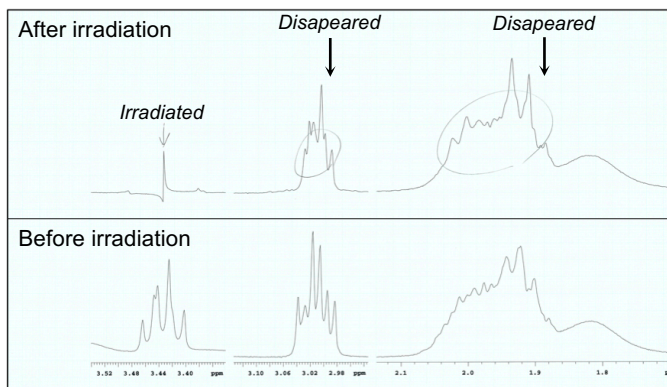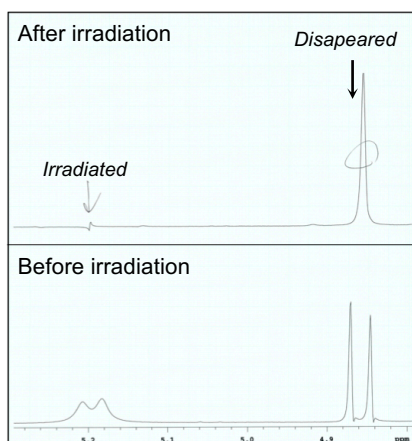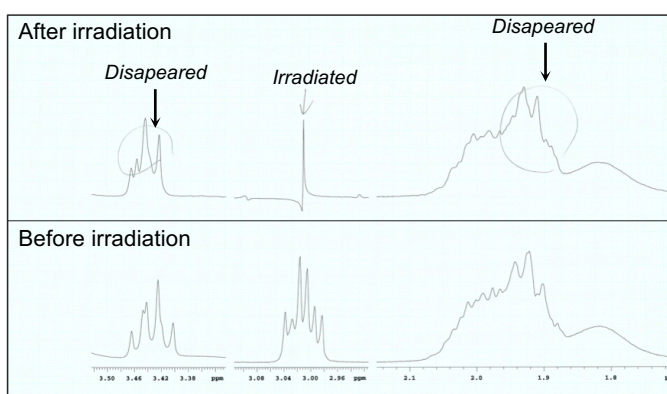



HSQC spectrum of (±)-1,2,3,3a,3b,8-hexahydro-15*H*-dibenzo[*c,f*]pyrrolo[2',1':4,5][1,2,5]oxadiazino[2,3-*a*]azepine (**3ue**)

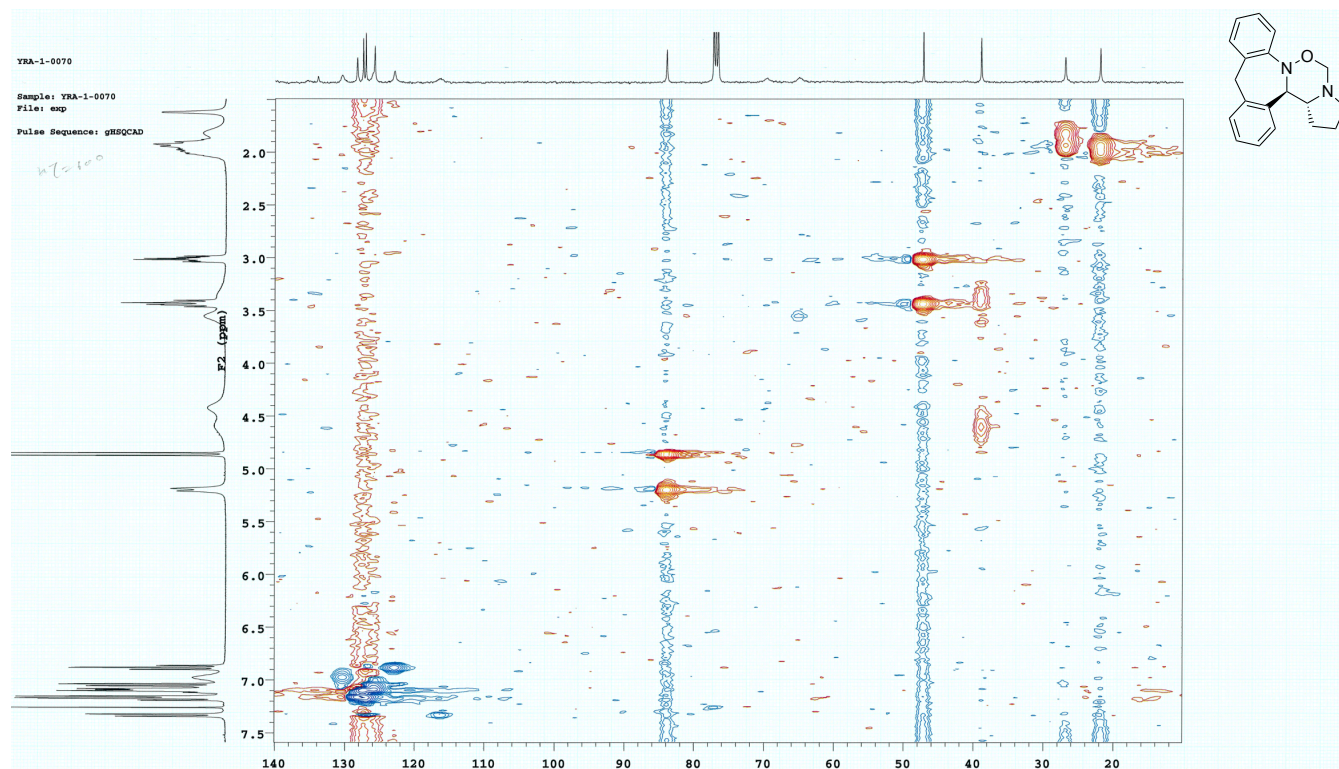

HMBC spectrum of (±)-1,2,3,3a,3b,8-hexahydro-15*H*-dibenzo[*c,f*]pyrrolo[2',1':4,5][1,2,5]oxadiazino[2,3-*a*]azepine (**3ue**)

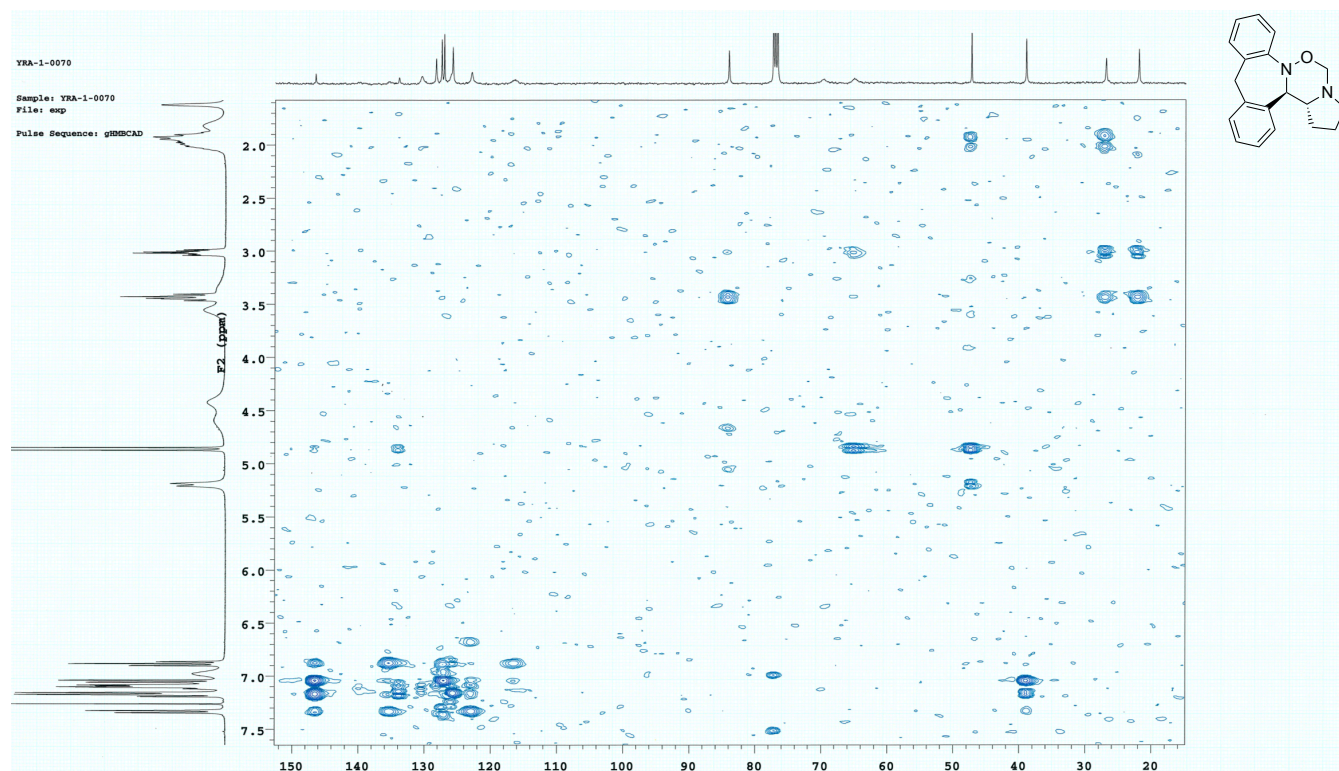



<sup>1</sup>H NMR spectrum of (±)-cyclohexyl(1,6,7,11b-tetrahydro-[1,2,5]oxadiazino[3,2-a]isoquinolin-2(3*H*)-yl)methanone (**4**) at 100 °C

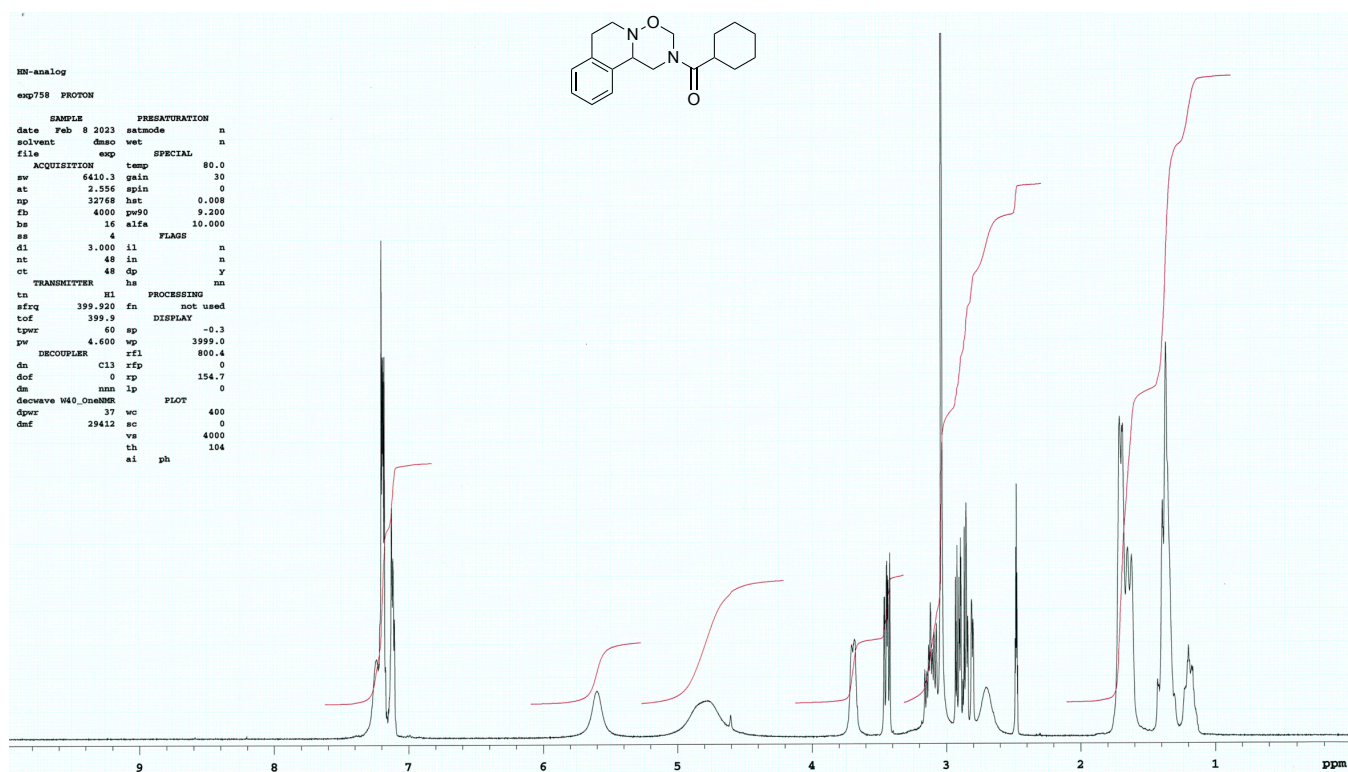

<sup>1</sup>H NMR spectrum of (±)-cyclohexyl(1,6,7,11b-tetrahydro-[1,2,5]oxadiazino[3,2-a]isoquinolin-2(3*H*)-yl)methanone (**4**) at rt

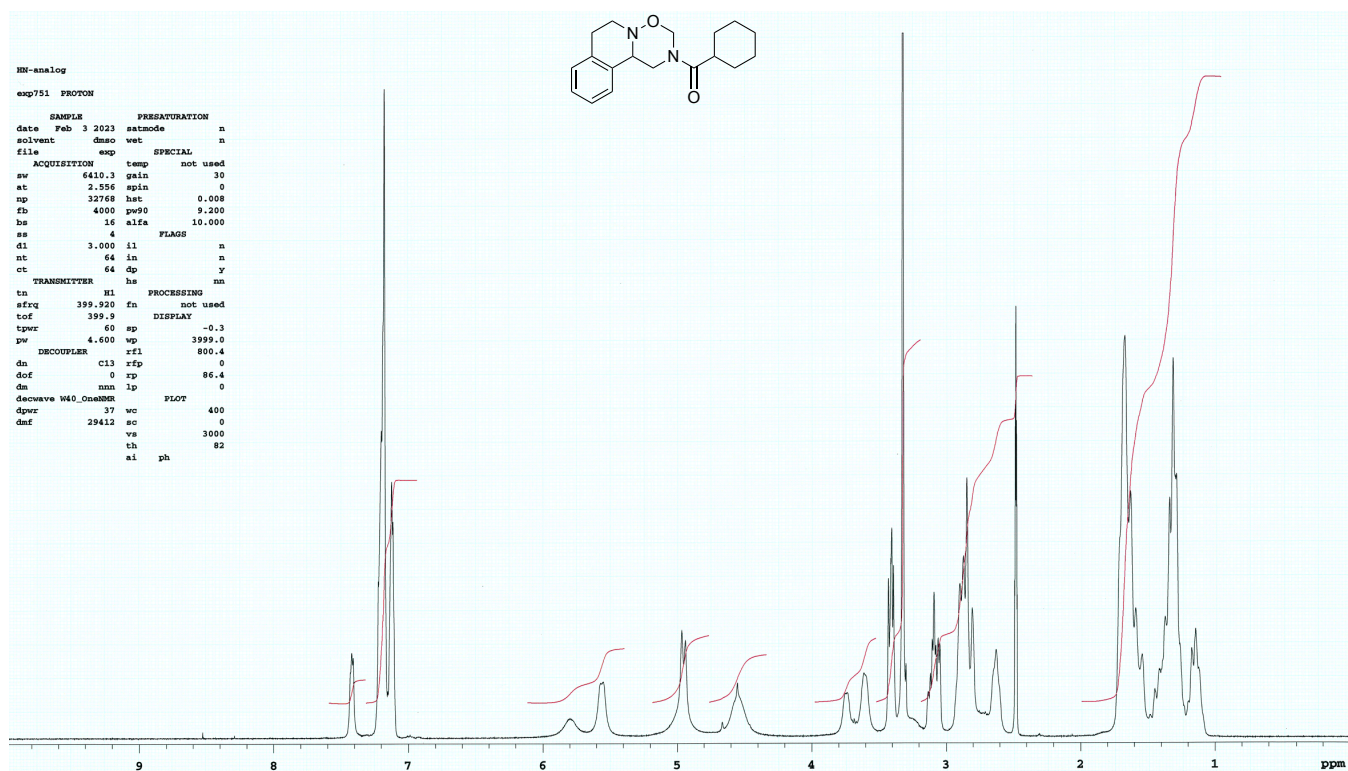



<sup>13</sup>C NMR spectrum of (±)-cyclohexyl(1,6,7,11b-tetrahydro-[1,2,5]oxadiazino[3,2-a]isoquinolin-2(3*H*)-yl)methanone (**4**) at 100 °C

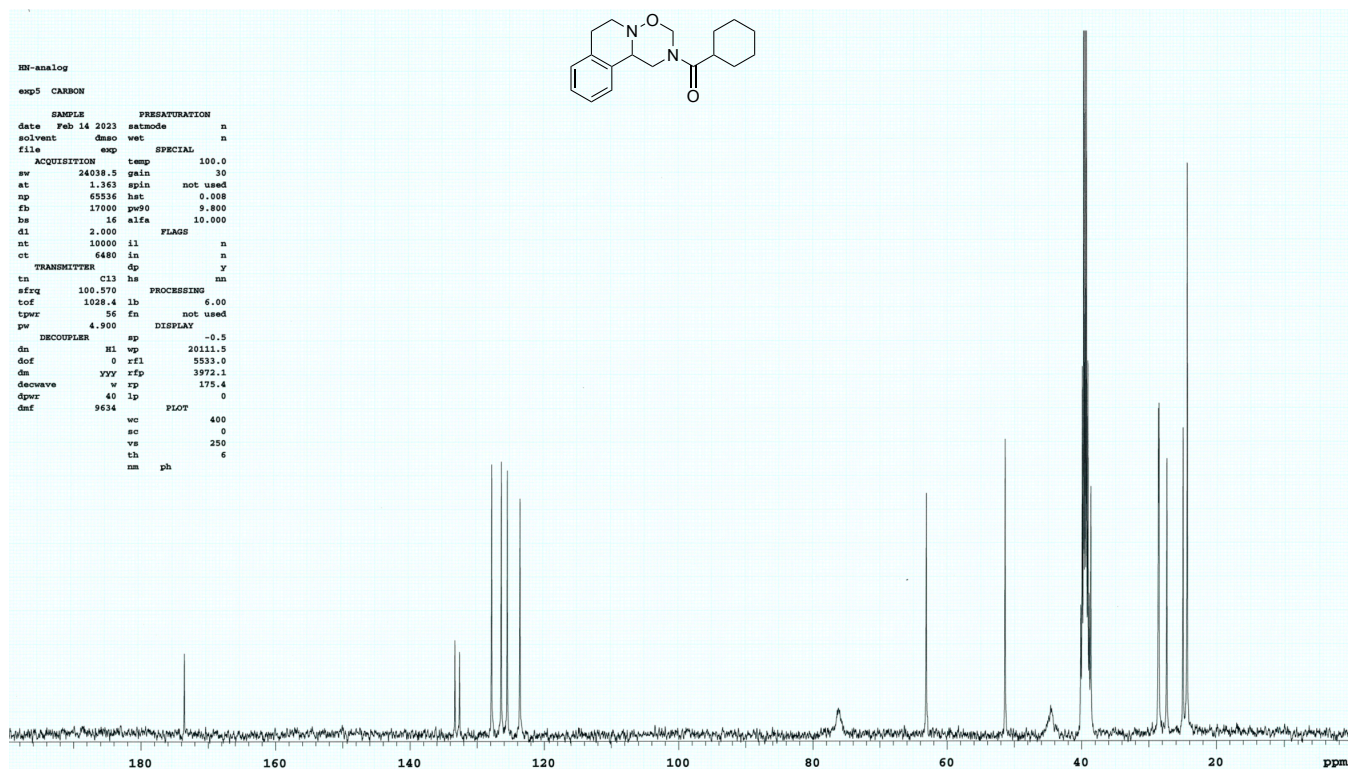

<sup>13</sup>C NMR spectrum of (±)-cyclohexyl(1,6,7,11b-tetrahydro-[1,2,5]oxadiazino[3,2-a]isoquinolin-2(3*H*)-yl)methanone (**4**) at rt

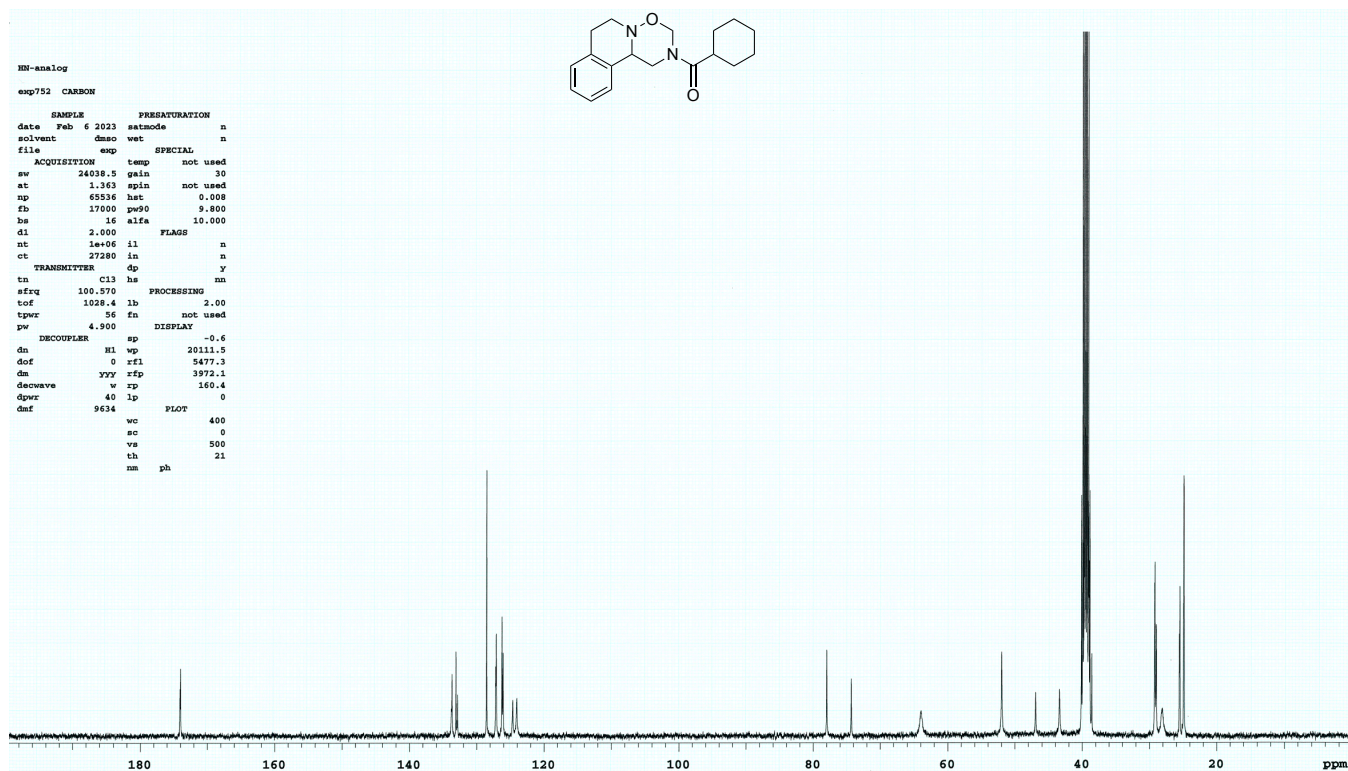



$^1\text{H}$ - $^1\text{H}$  COSY spectrum of ( $\pm$ )-cyclohexyl(1,6,7,11b-tetrahydro-[1,2,5]oxadiazino[3,2-a]isoquinolin-2(3*H*)-yl)methanone (**4**) at 100 °C

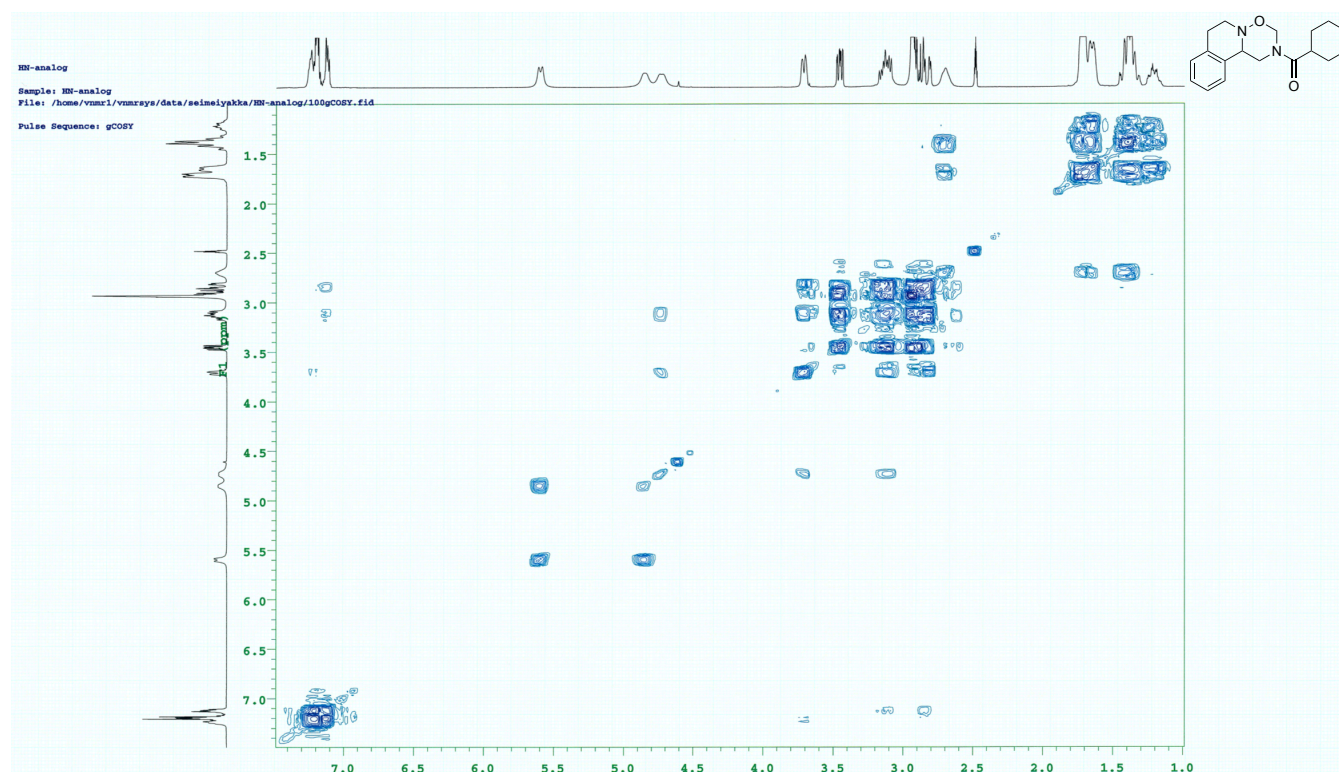

HSQC spectrum of ( $\pm$ )-cyclohexyl(1,6,7,11b-tetrahydro-[1,2,5]oxadiazino[3,2-a]isoquinolin-2(3*H*)-yl)methanone (**4**) at 100 °C

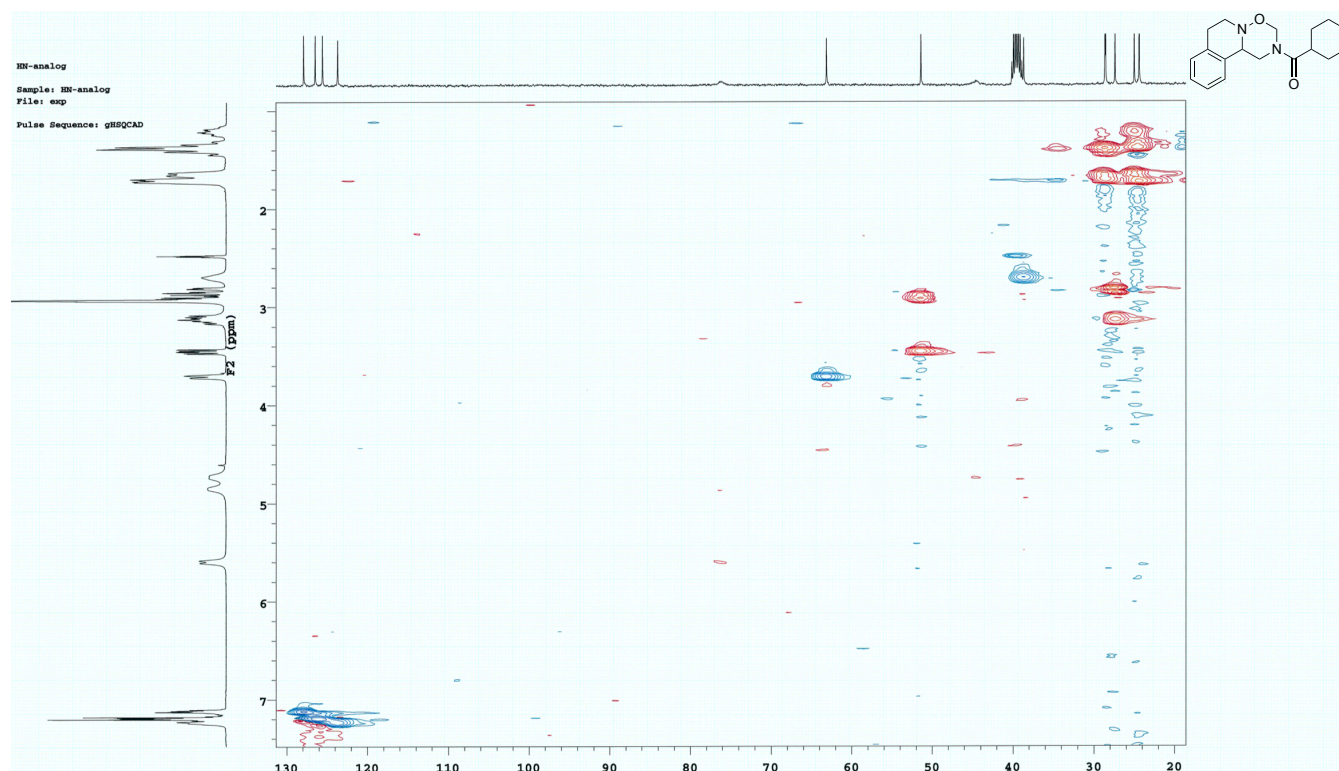

## 9. Quenching Experiment

Emission of Ir<sup>III</sup> complex **VIII** (excited at 380 nm, monitored at 475 nm) was quenched by nitron **1a**, *N,N,N',N'*-tetramethyldiaminomethane (**2**) in CH<sub>2</sub>Cl<sub>2</sub>. The Stern-Volmer plots is shown in Scheme 3 (a) in the article. The emission from the excited states of **VIII** was measured on Molecular Devices SpectraMax M5. The emission was quenched with **1a** and *N,N,N',N'*-tetramethyldiaminomethane (**2**) in Ar-saturated CH<sub>2</sub>Cl<sub>2</sub>. The relative emission intensities at 475 nm (excited at 380 nm) were determined with various concentrations of the quenchers. The Stern-Volmer relationship (equation 1) was obtained between the concentration of the quencher (Q) and the relative emission intensity ( $I_0/I$ ), where  $I_0$  and  $I$  represent the intensity in the absence and the presence of a quencher, respectively.

$$I_0/I = K_{SV}[Q] + 1 \quad (\text{eq. 1})$$

The slopes in the Stern-Volmer plots correspond to the Stern-Volmer constants ( $K_{SV}$ ). The quenching fraction of emission ( $\eta$  (%)) is calculated according to equation 2. The parameters for the quenching of emission of **VIII** are summarized in Table S1.

$$\eta = \{1 - I/I_0\} * 100 = \{K_{SV}[Q]/(K_{SV}[Q] + 1)\} * 100 \quad (\text{eq. 2})$$

**Table S1.** Quenching fraction ( $\eta$ ) of the emission of Ir<sup>III</sup> complex **VIII** in CH<sub>2</sub>Cl<sub>2</sub>.

| Quencher                                                 | Concentration (mM) | $K_{SV}$ (M <sup>-1</sup> ) | $K_{SV}$ [Q]       | $\eta$ (%) |
|----------------------------------------------------------|--------------------|-----------------------------|--------------------|------------|
| Nitron <b>1a</b>                                         | 50                 | $1.01 \times 10^4$          | $5.05 \times 10^2$ | 99.8       |
| <i>N,N,N',N'</i> -tetramethyldiaminomethane ( <b>2</b> ) | 500                | $2.86 \times 10^3$          | $1.43 \times 10^3$ | 99.9       |

## 10. Determination of Quantum Yield

The quantum yield of the reaction of nitron **1a** with *N,N,N',N'*-tetramethyldiaminomethane (**2**) was determined by using K<sub>3</sub>[Fe(C<sub>2</sub>O<sub>4</sub>)<sub>3</sub>] as the actinometer.<sup>6,7</sup> The photolysis of K<sub>3</sub>[Fe(C<sub>2</sub>O<sub>4</sub>)<sub>3</sub>] (0.15 M) was carried out in a room with dim light, as depicted in the previously reported literature from our group.<sup>1</sup> The volume of the solution in the photon flux reaction was adjusted to 1 mL. A plot of moles of Fe<sup>2+</sup> vs. irradiation time gave the average value of the three slopes of  $5.277 \times 10^{-8}$ . After that, the average value of the three slopes was divided by the quantum yield ( $\Phi_{std} = 1.14$ ) of the actinometer (0.15 M) at 405 nm, followed by the absorbed fraction of 1.0 to give  $4.629 \times 10^{-8}$  einsteins s<sup>-1</sup>. The plot of the formation of product **3aa** shown in Scheme 3 (b) in the article was drawn resulting from the following experiment. The mixture of nitron **1a** (10.0 mg,  $4.73 \times 10^{-2}$  mmol), *N,N,N',N'*-tetramethyldiaminomethane (**2**) (0.473 mmol), and Ir<sup>III</sup> complex **VIII** ( $2.37 \times 10^{-3}$  mmol), CH<sub>2</sub>Cl<sub>2</sub> (946  $\mu$ L), and a stirring bar was placed in a quartz cuvette (path length: 1.00 cm) with a silicon septum and deaerated by bubbling with Ar for 15 min. After irradiation with a definite time, the reaction solution was evaporated to dryness. The residue was dissolved in CDCl<sub>3</sub> with 1,1,2,2-tetrachloroethane as an internal standard and was transferred to an NMR tube. The resulting amount of 1,2,5-oxaziadinane **3aa** was determined with the <sup>1</sup>H NMR spectrum. The plots of the moles of **3aa** versus irradiation times gave the slope of  $1.053 \times 10^{-8}$ . The absorbance at 405 nm was >2, which corresponded to the absorbed fraction of >0.999. Finally, the quantum yield ( $\Phi_r$ ) of the formation of **3aa** was determined to be 0.23 according to equation 3.

$$\phi_r = \frac{(\text{Rate of product formation})}{(\text{Photon flux})} \quad (\text{eq. 3})$$

## 11. Determination of Redox Potential and Excited-State Potential of Ir<sup>III</sup> complex

### 11.1. Ir<sup>III</sup> complex VIII

Electrochemical measurements were conducted using a glassy carbon electrode and a coiled platinum as the working and the counter electrodes, respectively. A reference electrode was Ag/AgNO<sub>3</sub> in CH<sub>3</sub>CN, and the scan rate was 100 mV/s. Sample solutions were prepared by dissolving a sample (1 mM) in an electrolyte solution of [(Bu)<sub>4</sub>N][PF<sub>6</sub>] in CH<sub>3</sub>CN (0.1 M, 8 mL) (Figure S3). The reference electrode was calibrated before measurements using an external ferrocene standard. Electrochemical data of Ir<sup>III</sup> complex VIII are depicted in Table S2.

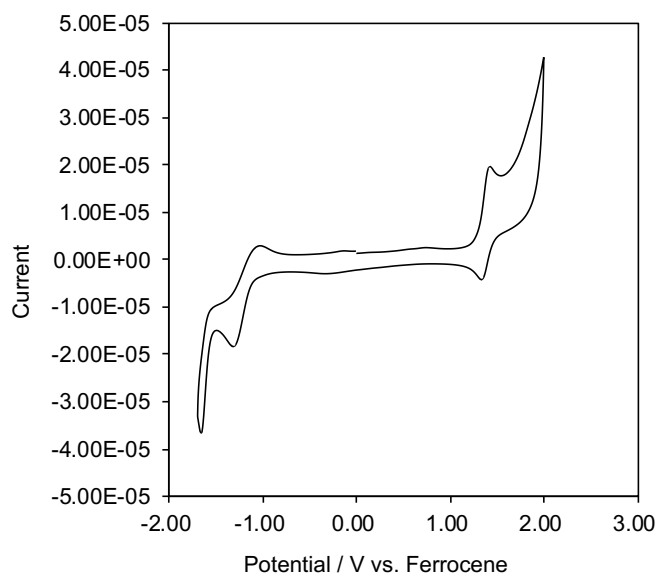

**Figure S3.** Cyclic voltammogram of Ir<sup>III</sup> complex VIII.

**Table S2.** Electrochemical data (potential in V vs. Fc/Fc<sup>+</sup>) of VIII in CH<sub>3</sub>CN at 298 K.

| VIII      | Fc/Fc <sup>+</sup> | Ir <sup>III</sup> /Ir <sup>II</sup> | Ir <sup>III</sup> /Ir <sup>II</sup> vs. Fc/Fc <sup>+</sup> | Ir <sup>III</sup> /Ir <sup>IV</sup> | Ir <sup>III</sup> /Ir <sup>IV</sup> vs. Fc/Fc <sup>+</sup> |
|-----------|--------------------|-------------------------------------|------------------------------------------------------------|-------------------------------------|------------------------------------------------------------|
| $E_{1/2}$ | +0.085             | -1.18                               | -1.26                                                      | +1.38                               | +1.30                                                      |
| $E_p$     | —                  | -1.03                               | -1.12                                                      | +1.43                               | +1.34                                                      |
| $E_n$     | —                  | -1.32                               | -1.40                                                      | +1.34                               | +1.25                                                      |

Excited-state potentials are estimated using the Rehm-Weller equations as given (equation 5 and 6):

$$E^{0*}_{Ox} = E^{0'}_{Ox} - E^{0-0} \quad (\text{eq. 5})$$

$$E^{0*}_{Red} = E^{0'}_{Red} + E^{0-0} \quad (\text{eq. 6})$$

Where  $E^{0*}$  and  $E^{0'}$  represent the excited state potential and the ground state potential, respectively.  $E^{0-0}$  means the 0-0 transition frequency of Ir<sup>III</sup> complex VIII, which was revealed as 2.67 V in the previous report.<sup>1</sup>  $E_{Ox}$  represents the Ir<sup>III</sup>/Ir<sup>IV</sup> couples, and  $E_{Red}$  to the Ir<sup>II</sup>/Ir<sup>III</sup> couple. Therefore, excited state potentials (potential in V vs. Fc/Fc<sup>+</sup>) of VIII in CH<sub>3</sub>CN at 298 K are depicted in Table S3.

**Table S3.** Excited-state potentials ( $E^*$ ) (potential in V vs. Fc/Fc<sup>+</sup>) of VIII in CH<sub>3</sub>CN at 298 K.

| VIII  | *Ir <sup>III</sup> /Ir <sup>II</sup> vs. Fc/Fc <sup>+</sup> | *Ir <sup>III</sup> /Ir <sup>IV</sup> vs. Fc/Fc <sup>+</sup> |
|-------|-------------------------------------------------------------|-------------------------------------------------------------|
| $E^*$ | +1.41                                                       | -1.37                                                       |

## 11.2. Ir<sup>III</sup> complex IX

The absorption spectrum and emission spectrum of Ir<sup>III</sup> complex IX in MeCN are shown in Figure S4.

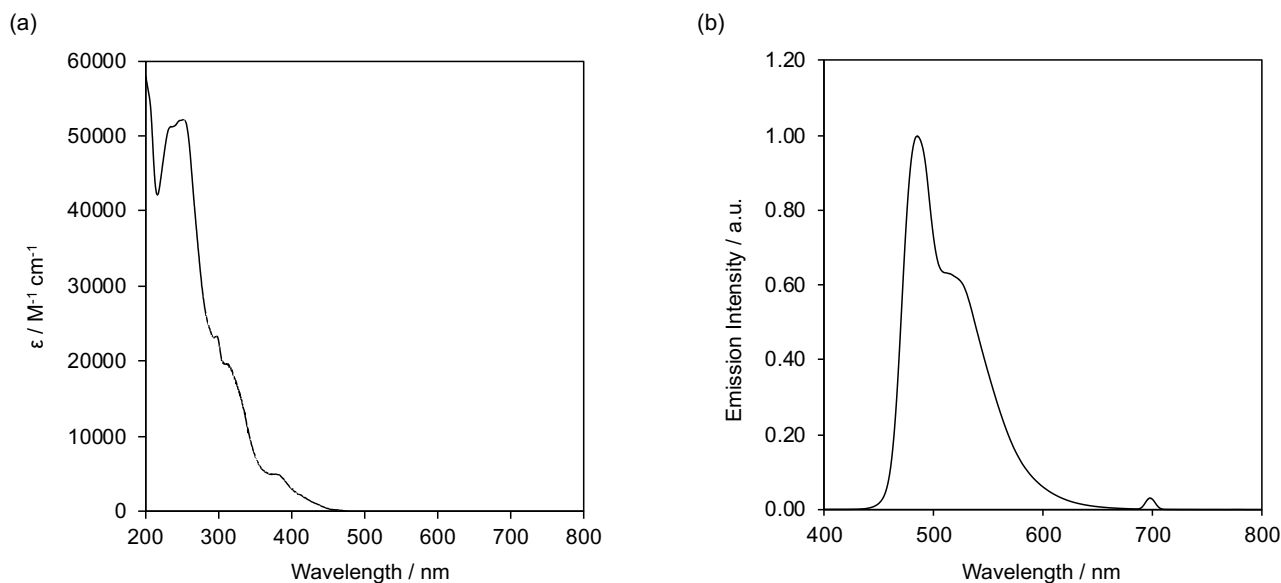

**Figure S4.** (a) Absorption spectrum of Ir<sup>III</sup> complex IX at 296 K ( $5.34 \times 10^{-6}$  M in MeCN). (b) Emission spectrum of Ir<sup>III</sup> complex IX at 296 K ( $5.34 \times 10^{-6}$  M in MeCN).

The emission spectrum of novel Ir<sup>III</sup> complex IX at 77 K in propionitrile/*n*-butyronitrile was measured in accordance with the previously reported method<sup>8</sup> to reveal that the maximum emission peak was observed at 2.63 eV (471 nm) as 0-0 transition frequency (Fig. S5a). Electrochemical measurements were conducted using a glassy carbon electrode and a coiled platinum as the working and the counter electrodes, respectively. A reference electrode was Ag/AgNO<sub>3</sub> in CH<sub>3</sub>CN, and the scan rate was 100 mV/s. Sample solutions were prepared by dissolving a sample (1 mM) in an electrolyte solution of [(Bu)<sub>4</sub>N][PF<sub>6</sub>] in CH<sub>3</sub>CN (0.1 M, 8 mL) (Figure S5b). The reference electrode was calibrated before measurements using an external ferrocene standard. Electrochemical data of Ir<sup>III</sup> complex IX are depicted in Table S4.

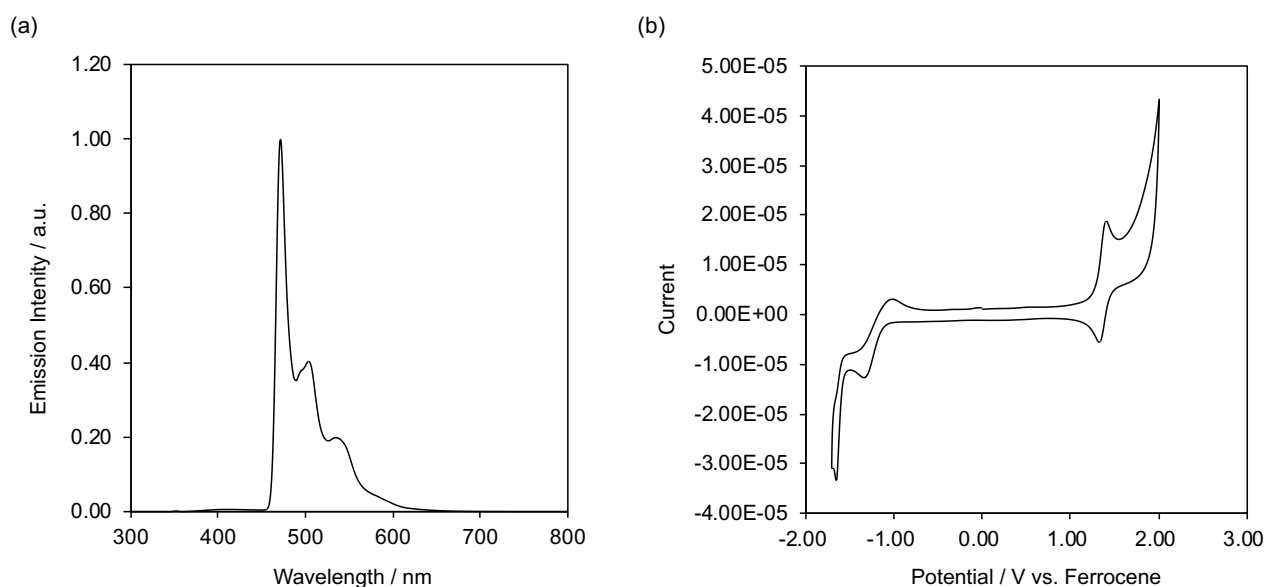

**Figure S5.** (a) Emission spectrum of Ir<sup>III</sup> complex IX at 77 K in propionitrile/*n*-butyronitrile. (b) Cyclic voltammogram of Ir<sup>III</sup> complex IX.

**Table S4.** Electrochemical data (potential in V vs. Fc/Fc<sup>+</sup>) of **IX** in CH<sub>3</sub>CN at 298 K.

| <b>IX</b> | Fc/Fc <sup>+</sup> | Ir <sup>III</sup> /Ir <sup>II</sup> | Ir <sup>III</sup> /Ir <sup>II</sup> vs. Fc/Fc <sup>+</sup> | Ir <sup>III</sup> /Ir <sup>IV</sup> | Ir <sup>III</sup> /Ir <sup>IV</sup> vs. Fc/Fc <sup>+</sup> |
|-----------|--------------------|-------------------------------------|------------------------------------------------------------|-------------------------------------|------------------------------------------------------------|
| $E_{1/2}$ | +0.085             | -1.18                               | -1.26                                                      | +1.36                               | +1.28                                                      |
| $E_p$     | —                  | -1.02                               | -1.10                                                      | +1.40                               | +1.32                                                      |
| $E_n$     | —                  | -1.34                               | -1.42                                                      | +1.32                               | +1.24                                                      |

Excited-state potentials are estimated using the Rehm-Weller equations depicted in equation 5 and 6. The 0-0 transition frequency of Ir<sup>III</sup> complex **IX**, which is revealed as 2.63 V. Therefore, excited state potentials (potential in V vs. Fc/Fc<sup>+</sup>) of **IX** in CH<sub>3</sub>CN at 298 K are depicted in Table S5.

**Table S5.** Excited-state potentials ( $E^*$ ) (potential in V vs. Fc/Fc<sup>+</sup>) of **IX** in CH<sub>3</sub>CN at 298 K.

| <b>IX</b> | *Ir <sup>III</sup> /Ir <sup>II</sup> vs. Fc/Fc <sup>+</sup> | *Ir <sup>III</sup> /Ir <sup>IV</sup> vs. Fc/Fc <sup>+</sup> |
|-----------|-------------------------------------------------------------|-------------------------------------------------------------|
| $E^*$     | +1.37                                                       | -1.35                                                       |

## 12. Computation of Dipole Moment

Structures of PZQ and **4** were optimized by B3LYP hybrid functional with 6-31G\*\* basis set using Gaussian 16. Solvent effect of water was considered using the polarizable continuum model with the integral equation formalism variant (IEFPCM). Optimized geometries and energies are shown in Tables S6 and S7. The values of dipole moments obtained by the same calculation method are 1.97 and 3.96 debye for PZQ and **4**, respectively. The vectors of dipole moments for both compounds are shown in Figure S6.

**Table S6.** Optimized geometry of PZQ. Energy of PZQ is -998.512628364 a.u.

| No. | Element | x (Å)     | y (Å)     | z (Å)     |
|-----|---------|-----------|-----------|-----------|
| 1   | N       | -0.749748 | -0.160301 | 0.614772  |
| 2   | C       | 0.592694  | -0.715016 | 0.701638  |
| 3   | C       | 1.500074  | -0.053635 | -0.343687 |
| 4   | N       | 1.448925  | 1.408316  | -0.167480 |
| 5   | C       | 0.394671  | 2.069570  | 0.381451  |
| 6   | C       | -0.814592 | 1.270466  | 0.872658  |
| 7   | C       | 2.597366  | 2.174162  | -0.657441 |
| 8   | C       | -1.817297 | -0.986162 | 0.357733  |
| 9   | C       | 2.926128  | -0.594000 | -0.253992 |
| 10  | C       | 4.034231  | 0.236782  | -0.017050 |
| 11  | C       | 3.853022  | 1.734915  | 0.091656  |
| 12  | O       | -1.647390 | -2.191834 | 0.150254  |
| 13  | C       | 3.126097  | -1.971813 | -0.430231 |
| 14  | C       | 4.398338  | -2.530611 | -0.339047 |
| 15  | C       | 5.497951  | -1.708782 | -0.078319 |
| 16  | C       | 5.310593  | -0.336997 | 0.070171  |
| 17  | C       | -3.213341 | -0.360203 | 0.292596  |
| 18  | C       | -4.295322 | -1.361272 | 0.774112  |
| 19  | C       | -5.669361 | -1.118111 | 0.110493  |
| 20  | C       | -5.887749 | 0.368841  | -0.194885 |
| 21  | C       | -4.850872 | 0.877922  | -1.224067 |
| 22  | C       | -3.517419 | 0.099021  | -1.154341 |
| 23  | O       | 0.357682  | 3.295505  | 0.518916  |
| 24  | H       | -1.675160 | 1.720676  | 0.379610  |
| 25  | H       | -0.905707 | 1.483153  | 1.947082  |
| 26  | H       | 0.521412  | -1.785660 | 0.527528  |
| 27  | H       | 1.005788  | -0.543867 | 1.704475  |
| 28  | H       | 1.100121  | -0.301269 | -1.338672 |
| 29  | H       | 2.713357  | 1.995279  | -1.733858 |
| 30  | H       | 2.376995  | 3.228588  | -0.501802 |
| 31  | H       | 4.729779  | 2.249024  | -0.316434 |
| 32  | H       | 3.767311  | 2.039572  | 1.142908  |
| 33  | H       | 2.278527  | -2.615284 | -0.649845 |
| 34  | H       | 4.531121  | -3.599452 | -0.475976 |
| 35  | H       | 6.495213  | -2.132726 | -0.008405 |



|    |   |           |           |           |
|----|---|-----------|-----------|-----------|
| 36 | H | 6.165866  | 0.310394  | 0.246799  |
| 37 | H | -3.246916 | 0.520495  | 0.940987  |
| 38 | H | -3.950098 | -2.376217 | 0.561212  |
| 39 | H | -4.388524 | -1.277182 | 1.863279  |
| 40 | H | -5.738230 | -1.686848 | -0.825947 |
| 41 | H | -6.464145 | -1.501946 | 0.759456  |
| 42 | H | -6.903501 | 0.545322  | -0.565260 |
| 43 | H | -5.798722 | 0.939418  | 0.738843  |
| 44 | H | -5.255558 | 0.788341  | -2.238873 |
| 45 | H | -4.663580 | 1.945303  | -1.059138 |
| 46 | H | -3.561236 | -0.794876 | -1.787741 |
| 47 | H | -2.701964 | 0.713817  | -1.551306 |

**Table S7.** Optimized geometry of **4**. Energy of **4** is -960.319474276 a.u.

| No. | Element | x (Å)     | y (Å)     | z (Å)     |
|-----|---------|-----------|-----------|-----------|
| 1   | N       | 0.691322  | -0.355127 | -0.560401 |
| 2   | C       | -0.628338 | -0.961512 | -0.409749 |
| 3   | C       | -1.515125 | -0.124253 | 0.551662  |
| 4   | N       | -1.086121 | 1.296069  | 0.422089  |
| 5   | C       | 0.647057  | 1.032059  | -1.055892 |
| 6   | C       | -2.160836 | 2.261256  | 0.655658  |
| 7   | C       | 1.817229  | -1.016603 | -0.153017 |
| 8   | C       | -2.994349 | -0.409129 | 0.319112  |
| 9   | C       | -3.889200 | 0.603818  | -0.065748 |
| 10  | C       | -3.393027 | 2.023308  | -0.223476 |
| 11  | O       | 1.761218  | -2.156602 | 0.321983  |
| 12  | C       | -3.473084 | -1.713915 | 0.511508  |
| 13  | C       | -4.814626 | -2.024809 | 0.299760  |
| 14  | C       | -5.702555 | -1.021040 | -0.097010 |
| 15  | C       | -5.238579 | 0.281521  | -0.267867 |
| 16  | C       | 3.151990  | -0.278316 | -0.277791 |
| 17  | C       | 3.496459  | 0.390419  | 1.074802  |
| 18  | C       | 4.759504  | 1.273420  | 0.956839  |
| 19  | C       | 5.777199  | 0.716199  | -0.066841 |
| 20  | C       | 5.671239  | -0.810507 | -0.167847 |
| 21  | C       | 4.288602  | -1.243735 | -0.704454 |
| 22  | H       | 1.310287  | 1.667216  | -0.459792 |
| 23  | H       | 0.909479  | 1.097171  | -2.118637 |
| 24  | H       | -0.485098 | -1.969571 | -0.027126 |
| 25  | H       | -1.114508 | -1.023582 | -1.388006 |
| 26  | H       | -1.264209 | -0.401372 | 1.584228  |
| 27  | H       | -2.424618 | 2.163846  | 1.715355  |
| 28  | H       | -1.746708 | 3.261235  | 0.504094  |

|    |   |           |           |           |
|----|---|-----------|-----------|-----------|
| 29 | H | -4.183603 | 2.733557  | 0.041321  |
| 30 | H | -3.127657 | 2.223868  | -1.268659 |
| 31 | H | -2.788248 | -2.494216 | 0.834303  |
| 32 | H | -5.166270 | -3.041455 | 0.448572  |
| 33 | H | -6.751728 | -1.250256 | -0.258876 |
| 34 | H | -5.930340 | 1.069173  | -0.556567 |
| 35 | H | 3.066975  | 0.510787  | -1.031719 |
| 36 | H | 2.652564  | 0.986100  | 1.441128  |
| 37 | H | 3.651286  | -0.406224 | 1.811797  |
| 38 | H | 4.472538  | 2.292105  | 0.671416  |
| 39 | H | 5.227016  | 1.349541  | 1.945456  |
| 40 | H | 5.587211  | 1.150697  | -1.057058 |
| 41 | H | 6.793172  | 1.018543  | 0.209722  |
| 42 | H | 6.459287  | -1.212538 | -0.814039 |
| 43 | H | 5.839484  | -1.245045 | 0.826115  |
| 44 | H | 4.313475  | -1.292446 | -1.799477 |
| 45 | H | 4.045229  | -2.247109 | -0.345119 |
| 46 | O | -0.683567 | 1.482139  | -0.974250 |

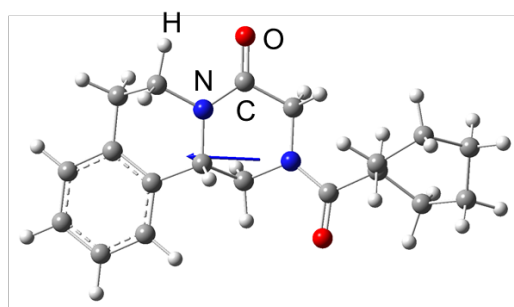

PZQ

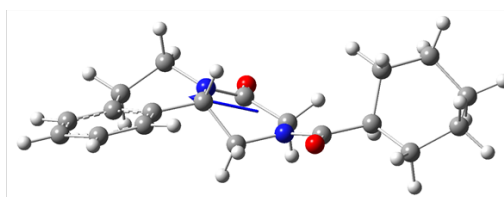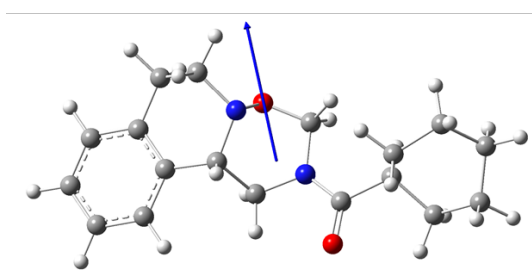

4

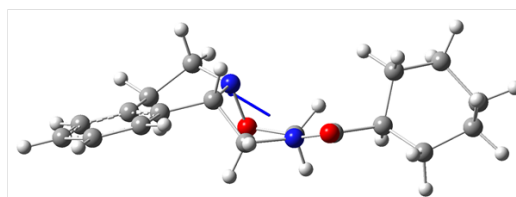

**Figure S6.** Vectors of dipole moments of PZQ (1.97 debye) and **4** (3.96 debye).

### 13. Single Crystal X-Ray Diffraction of **3ab**

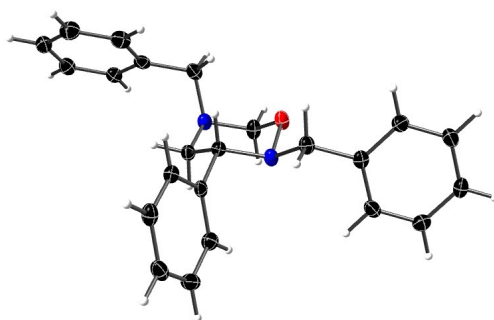

**Figure S7.** ORTEP drawing of **3ab** (CCDC deposition number: 2224678)

Suitable colorless crystals of **3ab** for X-ray diffraction measurements was obtained from the mixed solution of *n*-hexane and ethyl acetate at room temperature. Thermal ellipsoids are drawn at 50% probability level.

#### EXPERIMENTAL DETAILS

**Table S8.** Crystal Data.

|                      |                                                                                                                |
|----------------------|----------------------------------------------------------------------------------------------------------------|
| Empirical Formula    | C <sub>23</sub> H <sub>24</sub> N <sub>2</sub> O                                                               |
| Formula Weight       | 344.46                                                                                                         |
| Crystal Color, Habit | colorless, platelet                                                                                            |
| Crystal Dimensions   | 0.300 X 0.300 X 0.300 mm                                                                                       |
| Crystal System       | monoclinic                                                                                                     |
| Lattice Type         | C-centered                                                                                                     |
| Lattice Parameters   | a = 21.6310(4) Å<br>b = 5.52013(10) Å<br>c = 30.7878(6) Å<br>β = 90.895(6) °<br>V = 3675.80(12) Å <sup>3</sup> |
| Space Group          | C2/c (#15)                                                                                                     |
| Z value              | 8                                                                                                              |
| D <sub>calc</sub>    | 1.245 g/cm <sup>3</sup>                                                                                        |
| F <sub>000</sub>     | 1472.00                                                                                                        |
| μ(CuKα)              | 5.955 cm <sup>-1</sup>                                                                                         |

**Table S9.** Intensity Measurements

|                                              |                                                                       |
|----------------------------------------------|-----------------------------------------------------------------------|
| Diffractometer                               | R-AXIS RAPID                                                          |
| Radiation                                    | CuK $\alpha$ ( $\lambda$ = 1.54187 Å)<br>graphite monochromated       |
| Voltage, Current                             | 50kV, 40mA                                                            |
| Temperature                                  | -180.0°C                                                              |
| Detector Aperture                            | 460.0 x 256.0 mm                                                      |
| Data Images                                  | 180 exposures                                                         |
| $\omega$ oscillation Range (c=54.0, f=0.0)   | 80.0 - 260.0°                                                         |
| Exposure Rate                                | 30.0 sec./°                                                           |
| $\omega$ oscillation Range (c=54.0, f=90.0)  | 80.0 - 260.0°                                                         |
| Exposure Rate                                | 30.0 sec./°                                                           |
| $\omega$ oscillation Range (c=54.0, f=180.0) | 80.0 - 260.0°                                                         |
| Exposure Rate                                | 30.0 sec./°                                                           |
| $\omega$ oscillation Range (c=54.0, f=270.0) | 80.0 - 260.0°                                                         |
| Exposure Rate                                | 30.0 sec./°                                                           |
| $\omega$ oscillation Range (c=0.0, f=0.0)    | 80.0 - 260.0°                                                         |
| Exposure Rate                                | 30.0 sec./°                                                           |
| Detector Position                            | 127.40 mm                                                             |
| Pixel Size                                   | 0.100 mm                                                              |
| $2\theta_{\text{max}}$                       | 136.4°                                                                |
| No. of Reflections Measured                  | Total: 19648<br>Unique: 3366 ( $R_{\text{int}}$ = 0.0253)             |
| Corrections                                  | Lorentz-polarization<br>Absorption<br>(trans. factors: 0.683 - 0.836) |

**Table S10.** Structure Solution and Refinement

|                                       |                                                                                                                 |
|---------------------------------------|-----------------------------------------------------------------------------------------------------------------|
| Structure Solution                    | Direct Methods (SIR2008)                                                                                        |
| Refinement                            | Full-matrix least-squares on $F^2$                                                                              |
| Function Minimized                    | $\sum w (F_o^2 - F_c^2)^2$                                                                                      |
| Least Squares Weights                 | $w = 1 / [ s^2(F_o^2) + (0.0430 \cdot P)^2 + 2.8001 \cdot P ]$<br>where $P = (\text{Max}(F_o^2, 0) + 2F_c^2)/3$ |
| $2\theta_{\text{max}}$ cutoff         | $136.4^\circ$                                                                                                   |
| Anomalous Dispersion                  | All non-hydrogen atoms                                                                                          |
| No. Observations (All reflections)    | 3366                                                                                                            |
| No. Variables                         | 235                                                                                                             |
| Reflection/Parameter Ratio            | 14.32                                                                                                           |
| Residuals: R1 ( $I > 2.00\sigma(I)$ ) | 0.0382                                                                                                          |
| Residuals: R (All reflections)        | 0.0426                                                                                                          |
| Residuals: wR2 (All reflections)      | 0.0958                                                                                                          |
| Goodness of Fit Indicator             | 1.078                                                                                                           |
| Max Shift/Error in Final Cycle        | 0.001                                                                                                           |
| Maximum peak in Final Diff. Map       | $0.20 \text{ e}^-/\text{\AA}^3$                                                                                 |
| Minimum peak in Final Diff. Map       | $-0.20 \text{ e}^-/\text{\AA}^3$                                                                                |

---

## 14. Biological Assay

Freshly isolated adult schistosomes from the infected mice were cultured in RPMI 1640 medium containing 5% fetal bovine serum and penicillin/streptomycin with or without the tested compound including **4** or PZQ at concentrations of 0.1  $\mu$ M, 1  $\mu$ M, and 10  $\mu$ M or No.4..., at 37°C in an atmosphere containing 5% CO<sub>2</sub>.

## 15. ADMET Assay

### 15.1. Solubility and LogD

Each compound dissolved in PBS at a final concentration of 100  $\mu$ M in 1% DMSO. After shaking for 20 min, each solution was filtered using MultiScreen HTS MSSLBPC10 (Millipore) and filtrates were analyzed via UPLC (ACQUITY UPLC, Waters), using BEH C18 column (1.7  $\mu$ m, 2.1  $\times$  50 mm, Waters) with photodiode array detection (wavelength was 280 nm), and the solubility (%) of each compound was calculated by comparing the peak area with that of each well-dissolved (100  $\mu$ M in 5% DMSO) solution. Mobile phase A = 10mM ammonium acetate/5% acetonitrile/water, B = 10mM ammonium acetate/5% water/acetonitrile, and gradient system as follows: 0 min-2% B, 1.0 min-98% B. The flow rate was 0.8 mL/min. The logD (pH7.4) values were also calculated by comparing the retention times with that of standard compounds with a known logD value.

### 15.2. Caco-2 Assay

A caco-2 permeability assay was performed as follows. Briefly, 25  $\mu$ M each compound/HBSS solution was added to the upper wells of cultured Caco-2 cells in a trans-well-plate, and HBSS with 1% BSA was added to the lower wells. After incubation for 2 h, the solution on the top plate and the bottom plate was collected. Acetonitrile was added to the solution, which was vortexed and centrifuged at 3500 rpm for 20 min. The supernatant was analyzed by LC-MS/MS, and the apparent permeability coefficient (Papp) was calculated. The class "high" means that the Papp of compound was higher than the Papp of propranolol.

### 15.3. LC-MS/MS Analysis

LC-MS/MS analysis was performed using an ACQUITY UPLC® system (Waters) fitted with a cooling autosampler and a column oven with temperature control. Mass spectrometry was performed using a Waters Xevo TQ-S tandem quadrupole mass spectrometer (QQ-MS; Waters). Chromatographic separation was performed on an ACQUITY UPLC® BEH C18 1.7  $\mu$ m column (50 mm  $\times$  2.1 mm; Waters). The mobile phase A was 0.1% formic acid in water (v/v), and acetonitrile containing 0.1% formic acid was used as mobile phase B. The flow rate was set at 0.5 mL/min. The sample injection volume was 5  $\mu$ L. The injected sample was eluted from the column with the following gradient program: 1.8-min linear gradient in solvent B from 2% to 98%, 0.7-min linear gradient in solvent B from 98% to 2%, and 2.5-min hold at 2% B. Positive electrospray ionization was used to generate the parental ions.

### 15.4. Acid Stability Assay

For the acid stability assay, 5  $\mu$ M each compound was added to acidic (dissolution test solution 1, pH1.2) or neutral (phosphate-buffered saline, pH7.4) buffers, respectively. After incubation at 37°C for 0, 1, and 5 hours at 37 °C, acetonitrile was added to each mixture, which was vortexed and centrifuged at 3500 rpm for 20 min. The supernatant was analyzed by LC-MS/MS, and the ratio of unchanged chemical compound at 1 or 5 hr compared to the unchanged each compound at 0 hr as 100% was calculated.

### 15.5. Metabolic Stability in Microsomes

For the metabolic stability assay, 500  $\mu$ M each compound was mixed with liver microsomes (Sekisui XenoTech, LLC, final concentration 0.2 mg protein/mL), coenzyme group (1.3 mM NADPH, 3.3 mM G-6-P: Sigma, 3.3 mM MgCl<sub>2</sub>: Wako), and 0.45U/mL G6PDH (Oriental Yeast) at 37 °C, for 0 min and 60 min. Acetonitrile was added to each mixture, which was vortexed and centrifuged at 3500 rpm for 20 min. The supernatant was analyzed by LC-MS/MS, and the ratio of unchanged chemical compound at 60 min compared to the unchanged each compound at 0 min as 100% was calculated.

15.6. Cytotoxicity Assay

The Hela cells were plated to the 96 well microplate at 1,000 cells/well and incubated in the culture medium. Each compound was treated with 10, 20, and 30  $\mu\text{M}$  for 2 days, then WST-8 reagent was added and measured at 405 nm. Cytotoxicity was calculated using the cell viability of DMSO-treated wells as 100%.

15.7. Cardiotoxicity Assay

The human iPS cell-derived cardiomyocytes, iCell<sup>®</sup> Cardiomyocytes<sup>2</sup> (FUJIFILM Cellular Dynamics, Inc.) were plated to the gelatin-coated 96 well half-area microplate (Corning<sup>®</sup> 3882) at 30,000 cells/well and incubated in the culture medium. After 9 days of cells maintenance, cells were stained with EarlyTox<sup>™</sup> Cardiotoxicity Kit (Molecular Devices, LLC.), and were set on FDSS system (Hamamatsu photonics K.K.) for  $\text{Ca}^{2+}$  transient measurements, made pre and after compound treatment.

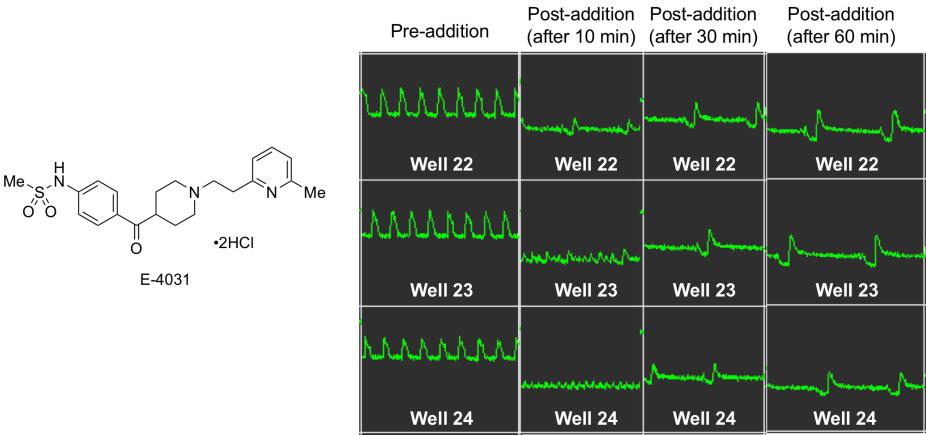

Figure S8. Time-course evaluation of the cardiotoxic effects of the hERG channel blocker E-4031.

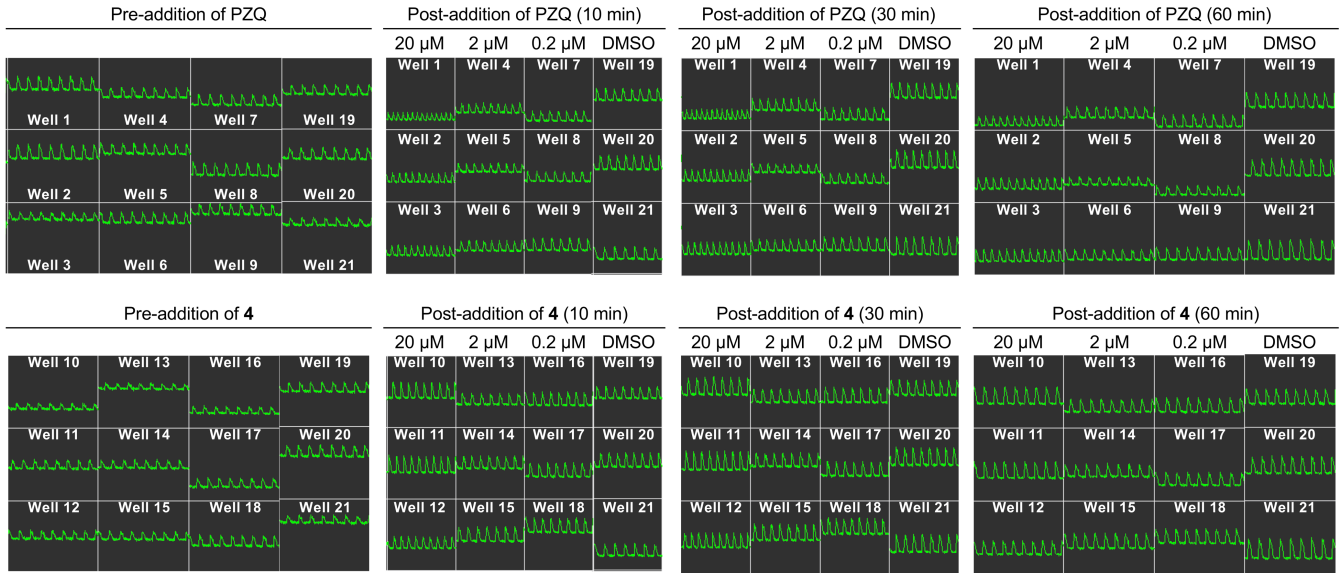

Figure S9. Time-course evaluation of the cardiotoxic effects of PZQ and 4.

---

## 16. References

- 1 K. Itoh, N. Ishii, A. Takashino, A. Hara, S. Kon, T. Mizuguchi, F. Karaki, S. Hirayama, Y. Shibagaki, K. Nagai, N. Sato, K. Tokunaga, M. Suzuki, M. Hashimoto, H. Fujii, *J. Photochem. Photobiol. A: Chem.*, 2022, **434**, 114293.
- 2 D. M. Schultz, J. W. Sawicki, T. P. Yoon, *Beilstein J. Org. Chem.*, 2015, **11**, 61–65.
- 3 H. Li, J. Oppenheimer, M. R. Smith III, R. E. Maleczka Jr. *Tetrahedron Lett.*, 2016, **57**, 2231–2232.
- 4 (a) C. Gella, È. Ferrer, R. Alibés, F. Busqué, P. de March, M. Figueredo, J. Font, *J. Org. Chem.*, 2009, **74**, 6365–6367; (b) K. S. Chan, M. L. Yeung, W.-K. Chan, R.-J. Wang, T. C. W. Mak, *J. Org. Chem.*, 1995, **60**, 1741–1747.
- 5 (a) Y. Xie, B. Qian, P. Xie, H. Huang *Adv. Synth. Catal.*, 2013, **355**, 1315–1322; (b) K. Itoh, A. Takashino, A. Ohtsuka, M. Kobe, S. Sawamura, R. Kato, S. Hirayama, F. Karaki, T. Mizuguchi, N. Sato, K. Tokunaga, Y. Toda, H. Suga, H. Ishida, H. Fujii, *ChemPhotoChem*, 2020, **4**, 388–392.
- 6 M. Montalti, A. Credi, L. Prodi, M. T. Gandolfi, in *Handbook of Photochemistry*, 3rd ed., CRC Press, Boca Raton, 2006, pp. 601–616.
- 7 G. J. Choi, Q. Zhu, D. C. Miller, C. J. Gu, R. R. Knowles, *Nature*, 2016, **539**, 268–271.
- 8 K. P. S. Zononi, B. K. Kariyazaki, A. Ito, M. K. Brennaman, T. J. Meyer, N. Y. M. Iha, *Inorg. Chem.*, 2014, **53**, 4089–4099.
